# Supplementary material for: High-Density Mapping of an Adult-Plant Stripe Rust Resistance Gene YrBai in Wheat Landrace Baidatou Using the Whole Genome DArTseq and SNP Analysis
Source: Front Plant Sci. 2018 Aug 2;9:1120. doi: 10.3389/fpls.2018.01120 (PMC6083057; doi:10.3389/fpls.2018.01120)
Supplement: Supplementary file 1 [file Table_1.xlsx]

## Sheet: Sheet1
Table S1 High-density genetic map of wheat developed using an F3 population derived from the cross Mingxian169/Baidatou
Clone ID	Sequence	Chromosome	Genetic position
1144874	TGCAGCTGAGCCGAGCCGCGGACTCTGCTGCACGCAGCCATGGACGAACGCCTCCG	1A-1	0
1091468	TGCAGCCTCGGGCGGCAGAGGTGGTGAACGTTTGGTTGTTGGGGAGAACGTCGCTCGTCACTGTAGCCA	1A-1	4.624
4009079	TGCAGCTCGCCGATGACGCCG	1A-1	6.059
3934878	TGCAGGGATGCGCTACGGCCTTGTACTCGGCCCACCG	1A-1	15.501
3026425	TGCAGACAGATCGTGCCTAATCGGGAAGGGAATAGATTTGGAGCCG	1A-1	17.108
1281103	TGCAGCTCCCTGCCCTTGCATTCTTCACACTTGACGATTCTTCCGATTGTGGTGATTGCTTTCTTGTTG	1A-1	17.658
1264920|F|0-59:G>T-59:G>T	TGCAGAATACTTGCGCTTCTTTGTCCTGGCAGAGGATCCTGATGCCTCGTTTACTAGCAGTTGGGTGCC	1A-1	27.402
1265391|F|0-41:G>C-41:G>C	TGCAGTTGCTGGCCAGTTGATTAAGATCTAGGGAGAGAGAAGAAAGAGAAGAAGCGAAGCAACAAAGAA	1A-1	29.02
4536993	TGCAGTGCCTGACAAGTGACAAGCCACCG	1A-1	31.173
1038481	TGCAGTCCTCCTCGCCTGCCAACAGCTGGTCTTGGCCTGATTCTCCCATTGATTTATCTAGCTGATGAA	1A-1	32.352
4538754	TGCAGGTGGTCCATGAAGCGGGCCTTGCCG	1A-1	37.201
3954360	TGCAGCGGCAGTCACCGCGCCG	1A-1	40.759
4398298	TGCAGTCACACACACGCCCACGGCCCG	1A-1	41.188
1219753	TGCAGCGACTCATGACGACCCGTATGATCCATCACGTCGGTCAGACCACGACCG	1A-1	42.552
3385385	TGCAGCGTCAAACTGTCAACTCTGTGACCATAAGCTGATGACACCCG	1A-1	43.213
1087917	TGCAGTCTGGAATTTGCACCTGAAACCTAATGCCATCAAGAGTGCGGCAATGGCAACTCCG	1A-1	43.415
3938417	TGCAGAGGGCGGCGATGGCGACAAGCAAGCGAGATGCACCG	1A-1	43.446
2336386	TGCAGGATAGATCAAGCCCATGTGGATGAGGTCTCGACAAGTGGGCGGCGGCAGCCG	1A-1	52.14
1094611	TGCAGCCGCGCAAGAGGAGGAGGAGGAGTTGGTGCTGGTGCTGGTGCTGGTGTGGGTGCGGTGGGCTCG	1A-1	53.297
3938531	TGCAGGAGTTTCGATCTGCTGGGTAACCAATCTTCAGTTTCTGGATCCATTCATGATGTGTCACGCACC	1A-1	54.016
1229007	TGCAGGTTAGCGGCCATGGTGGCGTCCAGCGTCGGGTTGGCCGAGCTCTTGGTGGACGCCAGCCGAGAT	1A-1	54.551
4537148	TGCAGCATCCCGCACTGGGCCG	1A-1	54.594
3937924|F|0-6:G>A-6:G>A	TGCAGAGAAAATCAAATCCCGCCG	1A-1	55.312
2294598	TGCAGTCGCTGAGCTCCCGTCGACAAAAGCCAGAATTGCCAGTCGCATGCCG	1A-1	55.38
3064754|F|0-9:A>C-9:A>C	TGCAGCTCCACCGCCCCTCCGCCTCCACCCCCGCCACCCGAATCGCCG	1A-1	56.866
4010069	TGCAGCGCTGCTGCCTCCCTTGTGCCACCTTCTTGTGCCGCACCTGCGTCGCCG	1A-1	57.51
4003014	TGCAGCAGCGGGGCTGCTGACGATGGCTTGCAAAGGAGGCCG	1A-1	57.854
4993660	TGCAGTTGATATCGATCCCAGTAAAAATAGTCTACTCTACTATTCGCCG	1A-1	58.24
1242827	TGCAGCGTTCCCGCCGTGTCAGATCTGAAGACCGAAGCCATGAGGAGTAAGGGTGAGCCTGGGCGTCCG	1A-1	58.358
5972464	TGCAGCACTGCTTGCCCGACCAGGAGGTCGACACCGCCGCCGCCGCCGCCGCTACCAAGTCCG	1A-1	58.442
5993305	TGCAGGCTCTTGCCGCCGCGCCGAATCCCG	1A-1	58.468
1386549	TGCAGAGGGAGACGAAGCGTGAAGGCGCCGTGGTTGTGAATACGCATTCTTTCCTCCAACCCCCGAGAT	1A-1	58.744
5570662	TGCAGCGTTCGAAGCTGAGGAGGCTGGTGGCGCCG	1A-1	58.935
7344130	TGCAGGCACCTCGGGCACGCTAGGGTCGGGTGAGGCAGCAACCAGCGCCTGGCCACCACGTCACGATGC	1A-1	58.952
1114966	TGCAGGCACGGGAAACAACGGGGATCCACCAGATCTGACGAGGCAATCCG	1A-1	59.026
1379284	TGCAGCGACGTCCCGTTCGGCTACTTCCCGCCGCCGTCCCCCAAGACGGAGTCCG	1A-1	59.048
7492316	TGCAGCCTCCTATGCCACGGACCTTGCCGCCGTCGCTGCCG	1A-1	59.139
1124420	TGCAGAGCGGCGCACACCTGAGCCGCCGCTTCTTCCTTGTCTCCGTCCAGCCTTCCCCTCAGGACCCGA	1A-1	59.38
3025434|F|0-18:T>C-18:T>C	TGCAGGGGTTGATGATCTTCTGGCCCCGAGCTCTGCCTCGCCG	1A-1	59.672
1257130	TGCAGATTGTACCTATCCACCGCGATGAGCAGCTGCGGCCACTGCCACATCGCATCTTCACCATCTTCC	1A-1	59.922
7488449	TGCAGAGCCTCGTCACCAGGGAGCCGTCGCCCCGCCTAATTCCCTCGCCACCG	1A-1	60.093
5360200	TGCAGCCGCCGCACGCACGCACGCACGCCGAGGCCGAGCCG	1A-1	60.484
3951968|F|0-7:A>G-7:A>G	TGCAGCCACCACACGCACGCACGCACGCCGAGGCCGAACCG	1A-1	60.671
1249756	TGCAGTGGGCAGTTGTGTAACCGCCGCTACCGAGCCGAGCGGCCGATGCTTTGCTCGGTGTCGCCGAGA	1A-1	60.851
6041134	TGCAGAAGAACATTCTAGTACGTACGCAATGAGCGAAAAGGACCG	1A-1	62.24
4398094	TGCAGCATCGGCCTAGGTTACTGCACCG	1A-1	62.301
3941919|F|0-11:T>A-11:T>A	TGCAGAAGAACTTTCTAGAACGTACGCAATGAGCGAAAAGGACCG	1A-1	62.329
5993151	TGCAGATTCATTGTTCTTGCCGTCGTTGGGCCG	1A-1	62.358
1265462	TGCAGGACTGAGAGGATGACACAGGTGGAGGGCCAGTGAACAACGAACACCCG	1A-1	62.555
7491370	TGCAGCCTCTCACTTCACCGTCGATGACACTGTGCTCCAACCCGTCTATGTCCAGTCCCG	1A-1	62.786
3025801|F|0-16:G>A-16:G>A	TGCAGTTGCCGCCTGCGCACGGTCTCACGTTCGCCATAAACCG	1A-1	63.43
1669409	TGCAGGTGAGGAGGTGTCCGCTGGGGGGGCGTGCCTCGGTCTCGGAGCGCACTGGCTCCTCCATCTCCA	1A-1	65.003
3064385|F|0-35:T>C-35:T>C	TGCAGACCGCAGCAAGAAAAGCTATCCTCGATGGTTCCCAACTCCG	1A-1	65.195
1109244	TGCAGCCAGATGTTGCTGCTAAGAACATCGCCGCCGATATGCTTGTGGCGTTGGGGCTGTTCCG	1A-1	68.348
1285618	TGCAGGGAGGGCGCCTCCATCTTGACACTGCATAGAGGCGGGGCCGCCG	1A-1	69.774
5011495	TGCAGCAGCTCCTTCATCTTCCTCCCG	1A-1	70.152
3937885	TGCAGAGGTGTTGTGCCATTGCTTCGGCGCTTGATTCTTTGGTACCTTCTCACCGTGCCAATGACGGCG	1A-1	71.106
3945977|F|0-12:C>T-12:C>T	TGCAGGCGCTGGCTAAAAGGCAATGTTCCTAACCG	1A-1	72.668
5332993	TGCAGGCCGCCTCCGAGTCGCGGCCGCCACCG	1A-1	77.404
1089606	TGCAGGTAGAGCAGCACGCCATAATCCATGATCCTGTTGTTGGAGACGACACTGAATACCG	1A-1	77.752
1268443	TGCAGTCCCCCATGTTTCACTTCATTGCTGGTACCACTTTCCTAACGACGAAAGAAGAAGCAAACGGTG	1A-1	80.653
1203934	TGCAGAGAAAGGCTCCCTCCTGACCTACATCAAGTATGCAATATGCTCAGCTAAAGGATCCG	1A-1	80.825
3022070	TGCAGATATCTACAATGAAGAGCACTACACTTTCTTTGCGGTCCCG	1A-1	82.816
5007726	TGCAGCACTGGTTGTTGGTGCACGTCGCGCCGCCG	1A-1	83.546
5360832	TGCAGCAGCTGTGATTTCCCTCGTCCATCGGCTAAACGCAAGTGCGTACGTGCAACGGCGCGAGACGTG	1A-1	84.603
4405135	TGCAGGCCTTTTCATCGCACGGGAAAGAAGAAGCCG	1A-1	85.186
7349646	TGCAGAGGTTGCCGACGCCGCCG	1A-1	86.322
1092436	TGCAGAACGTTCTGAACTATCGGCATGCACGTATACTGGATCGTGTAGAAAGGAGAAATAACCG	1A-1	86.942
4988910	TGCAGCAGGAGGCAGTAGCACAGGGCGCCG	1A-1	87.581
1207393	TGCAGCGATGCCCCTTCGCCAGCAGCTGTGGCACTACGGTGGGAACGTAGATCCATGGTGGGAAGGCAG	1A-1	89.235
3955510	TGCAGCCGCCTCCGCGACCGCTCCGCCCG	1A-1	92.54
3027433	TGCAGTCATGGTTTGCTGCATCGAACAGCAATGCATTTTTTTGGCCG	1A-1	92.725
1665599	TGCAGGGATTTTTCAAACAACGACTTCTGCGGCCCGATTCCGACCTCCG	1A-1	94.158
4536067	TGCAGGCCGAGCGTGGACATGCCG	1A-1	96.401
3935125|F|0-13:A>G-13:A>G	TGCAGCGGTTTTCATTACGGATAATTTTGACCG	1A-1	97.236
990457	TGCAGGAGCTCACCGCCGATAGGAGGCCGCAATACTACGTGGCCGGGATGCCGGGTTCTTTCTACACCA	1A-1	98.857
2275515	TGCAGATCTCCATCTCGATCTGTCTTGCTTCGAAACCTCTTTTCCGTTCGTTCTTCCCG	1A-1	99.433
982714	TGCAGACGAGGCGTTCGGGCTGAGAATCTAAAAAACAGCACGTTCGGCACTTATTGATTCCG	1A-1	100.109
4003244	TGCAGAGGGTGAGGAAACAGTACCG	1A-1	102.803
2331434	TGCAGCAGCCGACACTGCGGTGCGTGGTATGCCTCGACGTGCTCCCATGTGTGTTTTGCCACCG	1A-1	102.928
1066061	TGCAGCTTCAAGTACAAGTACATCTTACCATATCCACGGGGAATACCGCAGCCG	1A-1	112.663
988067	TGCAGCATCCACGTTCAATTTTGCATTACCAGTCATCGGGGCCAACCACGACCG	1A-1	113.947
3533517	TGCAGCTGCTTTGTCAACACGTGTGGGAAAGACTAGGGAAGACGCCG	1A-1	116.076
1108857	TGCAGACAGTTCGGCGGCTTAGACTTGTTAAGAGTTAACCACGATGTGCTATTCCAGTCCG	1A-1	120.17
3936654|F|0-16:C>G-16:C>G	TGCAGTACAGCGTCAACACTGGGCGCCTGTACCG	1A-1	121.298
1253088	TGCAGCAGCAGCAGCAGCAGCAGCCGCAGCCGCAGGAGCGGACATCAGGCCTTCTAACGGGCCCATGGC	1A-1	121.315
1124050	TGCAGGCGTCACCGTCACCTCCTGGATCAGCGCCTCAATCTCTGGGTAGGTGGCATGGTAGTTGATGGA	1A-1	122.048
4410113	TGCAGTCGCTGGCGCTGGACAACAACTATCTCACCG	1A-1	122.074
1012819	TGCAGATTGTCAATACTAGAACCAGAGCGAGTCCTGTGGTAAGGCAGGCGCCGATGGCTCGCCG	1A-1	122.104
2288948	TGCAGCATTGATCGATCTGAAGAGGAGTAGCCATATCTTTCTGGATGATGTCTGCCG	1A-1	124.12
992918	TGCAGTGGCGAGGGGCATCTTACCTGATGTGGTGAAGGAAGGAGACAGGGAGGTCGGAGATTGCAAGAC	1A-1	124.396
4539083	TGCAGGTGAAGCTTCGACATGAGCAGAGGCGGACGGTCTTCGAGTGGAGATGGAGCCG	1A-1	125.255
3951341	TGCAGGTAAGGGACGGAAGGGTCGAACGGGGCTGCTGCGCCGTCGCCG	1A-1	125.526
3947631	TGCAGGCAGGCAGACGGTAAGATTGTCATCATTCCTTGCTACTGACCG	1A-1	125.775
1104221	TGCAGGAAGAAGAAGCGCGAGGAGGCTCACCTCGTGCAGGCTGACGAGGAAGCGGACCCG	1A-1	126.217
1129063	TGCAGTGTGGGAACGGAGAGAGGGAGAGAGATTAGTGAGGAGAGGGACAGAAAAGGAAGAAGGGTGTTG	1A-1	127.188
2301074	TGCAGCGCTCCCACACCCAGCATGCCAAAAGAACCGTGTGGAGTATCGATCCTCACTGTTAGGCGGGGC	1A-1	127.79
1089882	TGCAGCCAACGTTGGCCTGATTGGACGACGCATCCAGGATGTTGGGCCAGTAGCCG	1A-1	130.588
7344649|F|0-8:T>C	TGCAGCGCTGGGACCTGGGCCG	1A-1	131.884
6042293	TGCAGCAAATCCATTTGCAGCCG	1A-1	143.592
1716459|F|0-27:T>C-27:T>C	TGCAGCGTTGACTAGTGAACGGTGATGTAGCAAGCTAGCGTGATTCGTTCCCG	1A-2	0
1083021|F|0-15:C>T-15:C>T	TGCAGCTCGGCCGCACGCGCCGCTGCGACCAGGAGATGGCGCCCACGCCACCG	1A-2	12.998
1159673|F|0-55:A>G-55:A>G	TGCAGCATCGCAGCATCCCCTTTGTTATGGAGATAGCATCTCAAGAAGATGCAGCATTCAGGATCGAGA	1A-2	14.673
1054654|F|0-66:C>T-66:C>T	TGCAGCAGCAACAACACATGAAGATCAGCATTTTGCACAACCAAGTAACCAAATTGAGCTGATCTCCAA	1A-2	17.279
1106808|F|0-20:G>C-20:G>C	TGCAGACTGGCACACCATCGGCAGAAGGAATTGAGAGCGTGATGTTCACGTACCGATTCATGGAGGACC	1A-2	18.708
977454|F|0-18:T>C-18:T>C	TGCAGCTCTAGCATCTCATGTTCATTGCTGTCCGCGACCTGGGCTGTGTGACTGTGTCGGCCTTCATCA	1A-2	21.287
1103396|F|0-23:C>T-23:C>T	TGCAGGCGGCACCGCGGGGCGCGCGCGCCCTCATGGTGTCCACGGAGGGCACCTCTATCATCAACTATG	1A-2	22.871
1126027|F|0-19:T>G-19:T>G	TGCAGACCACGGGGGCCGCTGTCGCGCGTAGATGGCGCCAGAGCGAGCGGGCAGCGCCG	1A-2	24.333
1082710|F|0-59:G>A-59:G>A	TGCAGATTGTGCAGATTCTTAACTAACTCAGTGTTGCTGCCAAACGAAGGTTTCTGTGAGGTTTGATCC	1A-2	26.992
1126925|F|0-46:C>T-46:C>T	TGCAGCGGCCGTTGTGCCCGCTGGGGTGGGCTGCTGTGCAGCACCACGCCG	1A-2	32.658
1160285|F|0-38:C>T-38:C>T	TGCAGTTACCGCGCCCAGGAGGAGGAGCATGTCTCCTACGTCGTCGCCG	1A-2	33.967
1119839|F|0-18:A>T-18:A>T	TGCAGGTCGACGAAGCACATGGTGGCGTGTTCTCTACCGATGGAGATGGCCTTGTGTGTGACAAAATCA	1A-2	35.84
1048305|F|0-12:G>T-12:G>T	TGCAGATACAGAGGAACGACATGTATCTACGATCGCTGTAGAGGGACATAGAGACGTGCATGCTACAAT	1A-2	36.79
1318644|F|0-10:C>T-10:C>T	TGCAGGCAGCCGAGTCTGGCGCACGGGCGAGGGCGGCAAGGAAGCCGCCCAGGGAGCGCTCGTGGACCG	1A-2	41.734
1124508|F|0-5:T>C-5:T>C	TGCAGTGCGCTCGTCGTCCTTGCGGTAGTGCCGCGGTCAGCCTGCAACATCCAACGTGGTCTTGCAACA	1A-2	43.914
3023260|F|0-47:C>G-47:C>G	TGCAGGGTATGATTGCAGACTTCGACATCCGCAGCTCACTCACGTTGCCATTGCAGATCTGCTCTTTCA	1A-2	46.441
1094246|F|0-48:A>G-48:A>G	TGCAGAAACACCACACGATCTGAAAAAACCGACAGAACATGTCGTCGGAGAAGCAGGAGACGGCGGCGG	1A-2	46.918
2253454|F|0-49:C>G-49:C>G	TGCAGCCCTTGTTCTTCTTCGAAGACACATGCATTCTGCTAAACCCGAGCTGCCACCCCAATTCTTCCC	1A-2	47.402
3948215|F|0-22:T>C-22:T>C	TGCAGTGGATGTGGTGACTACGTACCTTGTGGATGGAGAGGGCGTCGAGGATGGCGAGCACGTCGGCGA	1A-2	48.61
1076929|F|0-35:G>A-35:G>A	TGCAGATCAGGCACTTATACGGGTCTCTGCAATCAGCCTTGTTGTGGCCCTTCTCCAAGCATTTGTGAT	1A-2	49.592
2328274|F|0-17:A>G-17:A>G	TGCAGGTGAAGACCAACAGAGCAGCTTCGCTCGAGGCGGAGGCGAGACGAGCCATAGTCGCCCG	1A-2	49.883
1020599|F|0-5:C>A-5:C>A	TGCAGCGAATGAAGTTATTGTCATCGCTATCATCTTTAGTACCGTAACTAGCAAGACGATTAGCTACCG	1A-2	50.422
3028513|F|0-5:C>T-5:C>T	TGCAGCCTCTGCCGTCGCCAGGAGTGAACGCCAACCCG	1A-2	50.911
997000|F|0-23:T>C-23:T>C	TGCAGAACACCACCCAGTTCGGCTTCATGGCCGTCAGCCTCGGCTTCTACGACACCCTCATGTCCTGCT	1A-2	51.496
3950266|F|0-40:G>C-40:G>C	TGCAGCACGTCGAGTCCGTCGCCGACGAGATGGAGCTGCGGCGCCGCGAGCTGCGCCTCTACGCCAACA	1A-2	51.827
1091006|F|0-25:C>T-25:C>T	TGCAGGCGCAGTAGGCGAACACGAGCGCGACCAGGCGGAGGGGGAGGCCGAAGCCG	1A-2	52.286
1054139|F|0-63:A>G-63:A>G	TGCAGATTTAATTTAAATCTGCCTCAGTTAAATGATCATGCTGCACTGAACGACCTCAATTATAGTTCA	1A-2	53.163
1069488|F|0-52:A>T-52:A>T	TGCAGTCGTGTCCAGAAAATCCGCCGTCGTTCGCTTCTTCACCTTCGTCAATATGATCCAGCCG	1A-2	53.393
1138246|F|0-49:C>A-49:C>A	TGCAGTCGTGTCCAGAAAATCCGCCGTCGTTCGCTTCTTCACCTTCGTCCATTGGATCCAGCCG	1A-2	53.402
1218842|F|0-33:G>A-33:G>A	TGCAGCTGCAAGCCAAGCTGTGATGTGAAAATGGCTGCCTGCCCATGCATCCAGTGCAGAACCG	1A-2	53.532
1095019|F|0-5:A>G-5:A>G	TGCAGACAGACGTGTGATGCTTGCGACAGCGCACGGGAGGCGGAGGCATGCGAGTGAGAGCCG	1A-2	53.838
978646|F|0-67:C>A-67:C>A	TGCAGGGGGAATGGGGGATGGCCGTGCACAGGAGCAAGGCGGAAACGGCCTGCGCGGACCCAGCAACCC	1A-2	54.904
1209169|F|0-30:C>A-30:C>A	TGCAGCAATGCGCGCTTGTTACAACAATGCCTGTTCAGTATGTATGTAGCATTGGCATATCTTAAGTAC	1A-2	55.695
3570013|F|0-30:G>A-30:G>A	TGCAGGAGTCAGCTAAGGGACATCGACACAGACGCCG	1A-2	56.317
1364207|F|0-34:G>T-34:G>T	TGCAGGAAATGTCAAGGCAACTTCTTGCTCATCTGGCCAGCTGCTTTCCTTGTTTTGGCAGTTCGTTCG	1A-2	57.317
1032728|F|0-6:A>T-6:A>T	TGCAGTAAAGGCGGGCAGTTTGTGGAAACAACGTCGGCAAGGGCTGCCAAAGTCACCATGGCTGGATCC	1A-2	57.686
2276183|F|0-37:C>T-37:C>T	TGCAGGGAGGATGGATAGGCATCGGGCAATCACCAAGCGACAGGATAATGCTCCCTTCTCTTTGAGTGC	1A-2	58.13
1204450|F|0-39:T>C-39:T>C	TGCAGCTGCTCTTCCTGCGCGCCGCCTCCCTCGCTGAGCTCCGTGGCCTGGCCCTTCTACGGCAACTAG	1A-2	59.677
1089914|F|0-55:T>C-55:T>C	TGCAGATGGGCCCAAGGTTTTCATCAGATCATGATTTGTTTTGTTGTTATTAGTGTGGCACACCATGGT	1A-2	61.519
1070164|F|0-14:G>C-14:G>C	TGCAGAGCATGCAAGGGTAGGCTCTCTACTGAAGGATTTTACTAATTAAAGAACGTGTGTTCCG	1A-2	63.696
981496|F|0-36:T>C-36:T>C	TGCAGTGCTCTTCCATGACTTTTACTTAGAGCCCACTTCCGTGCTTGCTTAATGTTACTACTTAGGTAG	1A-2	65.386
1219432|F|0-19:G>C-19:G>C	TGCAGCATCTCCACCCAGAGAAGACATCTTCCAAACCAGCAGAAAACAGTTTCTCCGCGGTATAGCAGT	1A-2	66.877
2277220|F|0-46:G>A-46:G>A	TGCAGGAGGAGCACAGTAGTCTGGCTAGCTAGCTGTAAACACAGGCGAATTCGAGGACCCTCGGATCCA	1A-2	69.771
1057991|F|0-33:A>G-33:A>G	TGCAGCCCGCGTTGTTGACGCCGCGTCAGATGCAACCCGCAGTCGCATACAGTCGCCGTGGCACTACAT	1A-2	70.717
994411|F|0-50:G>C-50:G>C	TGCAGCCAGATTTGTGGTCTTGGGGGTGACTCATGGCAATGTATGCATGTGTGCGCGGTGGAGTGCACC	1A-2	73.694
1265562|F|0-34:T>C-34:T>C	TGCAGGCCGTGGTGGAGCTCAAGGACTTCCTGGATCACACCGCCATGCTCGCCATGCCCAGTCAGAGGA	1A-2	75.908
1023636|F|0-16:G>A-16:G>A	TGCAGGCCGTCGCCACGCCGCGCCTGGAGAATGAGGAGCTCTACAAGAGGGTCCCG	1A-2	81.494
1230905|F|0-48:G>A-48:G>A	TGCAGGTGAGGCAGGGCGCGGTAGTGAGGGGGGAGGCAGCAGCAGTGTGTGTACGCAGGAGCTCGGGCT	1A-2	82.103
1154273|F|0-8:G>C-8:G>C	TGCAGGTAGTCGAGCAGGTGTGCGCGTGTGTACGAGCGGCCGCGCGCCTATGCGGATGGAAGCGGTGAC	1A-2	83.915
1090990|F|0-13:G>A-13:G>A	TGCAGGCTAGCCTGCCCTACCACCACACCAGCAGGAGCGCTGGGCACTTGGCACGAGCATTTCACGCAA	1A-2	85.49
4396149|F|0-18:T>C-18:T>C	TGCAGAGCACCACAGCGCTGCCGCGGCCCTGCCG	1A-2	86.966
4262654	TGCAGGCACCGTGCCCTGTGCGCCCAGTGAATGTGATGGATGGCCG	1A-2	89.68
2275134	TGCAGATCAGAGACAACAGGGACCTCGACGAGGAAATACTTTCTCTCCCGTGCCTTATTGACCG	1A-2	92.767
3027804|F|0-28:G>T-28:G>T	TGCAGAAGCTCACCGCCGATAGGAGGCCGCAGTACTACGTGGCCG	1B	0
4439781	TGCAGTTAAGGATTCCAGTGGGCCG	1B	9.894
5323507	TGCAGACTTGTTGCCGACGGATTGCCG	1B	16.223
4537660	TGCAGCGGCAAGCGGCGGACAAGGCGCCTCGCACCATCGAGGAGGAGCCG	1B	27.714
2294594	TGCAGAACTGAAGTGCGAAACCCAAGCACTCGAAGATCTGCTCGACGGAAATCCGCACAAAAAAGCACA	1B	32.16
5410465	TGCAGCTCCTTTTGCTGCATCTCGAGATCCG	1B	32.678
3944551	TGCAGCAAGCAAGTAACTGATCCAAGGCGAGCCAGGAGCGGCCG	1B	36.105
1002994	TGCAGACGAGCATCAGCGACGCTGCCGTGGCGATGGTCTTGTCGTTTCCG	1B	37.697
1113378	TGCAGATGGGATCGTGTGAGAGGCATGTGACGTGGAGTGGGGGTGCCTGGCCCG	1B	41.828
4537683	TGCAGACTTTGCGATCAAAAGACCCCG	1B	46.408
5968517	TGCAGGCTACATGAGCAGCACCG	1B	50.247
4989982	TGCAGCTGCCTCCCCCACGGCCGCCG	1B	50.603
4404863	TGCAGCACCCTGCATGGCGAGCCG	1B	56.583
1000810|F|0-6:C>G-6:C>G	TGCAGACAAAGAGGAGGGCGTGGCAAGGGAGACGGGTGTGAGGCGGCGGCGGTAGGGGGATGCTGGCGG	1B	58.296
2300612	TGCAGCGTCTTCTTCAGCTCTGGGATGATGTGGATCTCCAGCTCCTGGAGCTTCTTGGATGCGTCGAAG	1B	58.421
4911107|F|0-18:C>G-18:C>G	TGCAGGACATCGACGGCGCCGCCGCCG	1B	60.352
7340540	TGCAGAGTCCCTAACTGGGCCG	1B	60.419
3952045	TGCAGCTGGGACTCCTTAGCAGGCAACATGGAGCACCTCACGTTGCTCAAGGAACTGCATATCGTGGGA	1B	61.529
7171709	TGCAGTCCCTCCACTCCTCCGCCGCCTCCTGCGTGGAGGTGCTCGCCGCCTCCGCCG	1B	62.231
1151931	TGCAGAGGGAATGTGCAGGCAGCATCCTACCAAGCAAAACTAAAGTCAGGAAAGGCTGCCG	1B	62.588
1120343	TGCAGGTAGGACTTGTCCTGAGACGTGGGCGAGACACACAAACTCAGGCCTGTGCCCG	1B	63.046
1130108	TGCAGCTCCAATACAGTCAGGTTCCAACGTCTAGTCACCATGGTTGAAACTTCCCTTGCTTCCCTGTCT	1B	63.371
4003336	TGCAGTGGGCACGAGACCTTTCCTTGTCTTTGTTCCTCCGACGCACGCCACAGGAGACTATTCCGAGAT	1B	64.388
4539373	TGCAGGTGCGCACTGGAGGCTGCCG	1B	65.568
5324458	TGCAGGACGACCACAGCTTCGCCG	1B	66.922
6005729	TGCAGCAGGCGCTGGCGGCGGCGACCGCCG	1B	67.33
7346289	TGCAGGACCAGCCCGCGCCCCGATGACCG	1B	69.214
1161479	TGCAGCAACTACGGACGCCACCGAGCACCACGGGCCGCTAGGCCATGGCGAGATCGACAACACCGAGAT	1B	73.567
4411311	TGCAGCTCGCCTCTCATTCTTTGATCCTCCCG	1B	73.73
5994083	TGCAGCAGCAGCAGCAGCAGCAGCAGCAGACCAGCTCGCTGGTCCG	1B	74.571
4541959	TGCAGCAGCAGCAGCAGCAGCAGCAGTTCCACCG	1B	74.714
7326559	TGCAGCTACGTCCTCTCCACAGGGCTGGTCCTGAGATTTCGGGGGGGGCCG	1B	75.708
4991375	TGCAGCAACGAAAATGGCAGGGCCG	1B	77.812
3953468	TGCAGGTAGTGAAGAGGAATCATGACGGGCGACTGAAACACTGCCG	1B	78.015
4541063	TGCAGGCCCCTGTTGTAACACCGCCG	1B	79.299
3941417	TGCAGCACATTCTCGTCGTAACACCTTCGGGGCTGGATCCG	1B	81.236
4396854	TGCAGTCGGACGGGAGCTAGCCG	1B	83.069
990828	TGCAGTTCAAGTCCGTGACGCATAATGCCTATGTGGCTGCCGAGCAGGGTGGCGGCGGGGCCCTCGTCG	1B	84.054
4439494	TGCAGGGGCATCCGCCGCCG	1B	86.883
4989300	TGCAGTCGTCGTCCTCCACGCCG	1B	87.342
12471086	TGCAGCGCCTTGTTAGGCCG	1B	89.142
7335726	TGCAGCGGCCGCTATCTGCCG	1B	94.422
1214988	TGCAGAACGTGTCGGCGCGGCGGCAGAGGTGTGGCGGAAGCGGCTCCGCGGATGGGCTGTTTCAGGCGA	1B	97.543
1132391	TGCAGCTCCTGCCCGCCATGGACGCCGCTCAGGAGGCTCGTCGGAAGCCAACCAGCGCCG	1B	103.954
7346032	TGCAGCGGCTGCGGTGCGCCACGTTCTACAGCACCG	1B	105.912
2303690	TGCAGTCGCCGCCATGGGTACCTGCGATCGACCGTCAATCAAGCGACGACAGCTTTGAACCCG	1B	107.789
3950468	TGCAGGAAGCAACACGCAACAAATCAGTCGAATCGTCTCGGCGGAGATGAAGGATCGTCAGCCG	1B	108.145
3939523	TGCAGATCGAATCGATCCCCTCCTCCG	1B	108.55
4407479	TGCAGCCGCAGACGCCCCCGCCAACCGCCG	1B	108.927
1082495	TGCAGGGACAAGGACATTGTTTCGTTATTGCCTTGAAGAAGATGAATGATTGCTTGGCCG	1B	110.045
4993719	TGCAGCCTCGACGTGTCCAACGCCG	1B	110.58
7342563|F|0-6:A>C-6:A>C	TGCAGCAGCTGGGCCCCCTCCG	1B	111.532
4004706	TGCAGAATTGAGCTCATCTCGAAGGCGGGAGCTCACGACCAGAGCCG	1B	111.561
1054863	TGCAGTTAGTGACAACTTTGTCTCCCTCCAGAGGCGACCAAGCTGATGTGCAGTTAGTGACAACTTCGT	1B	111.747
3945408	TGCAGCAGGACAGGGGGCTGACCCG	1B	112.245
3022615	TGCAGCTCTTCATGCCAGGTGCAGTGCAATTGTAGCCGCCG	1B	112.345
1092957	TGCAGGAGAGGGTGACACGGTGGTACATGCAGTCCCTGGCCTCGCGCGCCTCAAAGGGGGTCGGCTCCG	1B	115.59
7353167	TGCAGTCGCTATTCATGGGCCG	1B	121.802
3936801	TGCAGTCTTCGACGGCTACGTCCATCGACCGAAGACCTCGTCAACAGGATCAAGGGTGAAGCACCGAGA	1B	123.498
3939788	TGCAGGCCCTGCATCGGCGATCTCTCCG	1B	125.115
1234586	TGCAGCCCCCAATCCAAGCAGCAGCAGCAGCAGCAGCAGCTCCTTTCCGAGCAGCGACCG	1B	125.493
4705830	TGCAGGAGTCGCCAGTCACGCAGCGCACACTGCCCACCACCG	1B	126.775
4993475	TGCAGTTTAGGCACCCAAATAACCCG	1B	128.434
1263539	TGCAGGTCAACGCTTGCCTCATCGTCCAGGCCACAGCTGGTCTTTCCTCTCTACTGCCG	1B	129.132
3940549|F|0-10:T>G-10:T>G	TGCAGTCCACTCTGTGGCCGCTGGGCCACCCG	1B	130.537
5578423|F|0-15:A>G-15:A>G	TGCAGTCCGATCCGCATCAGCACACCG	1B	131.342
2291619	TGCAGATGAGAGGAGGTGAAGGCAAACCTGAACCGCCTCGACATCCTTGTTTCTGCTGTGTCCG	1B	131.724
1137897	TGCAGAGAGGTTGCGTCCTCTCAGGACCAACATGAATGTGACGCCTCGTCCCG	1B	132.073
3023738	TGCAGGGGTGATCTACAACAACAGAAGATGCAGAGTACCG	1B	132.527
3022659	TGCAGCGACAGAGAAAACTTGTTAGGAGGATAAGAAACCATTTTCCG	1B	132.823
1129684	TGCAGATCGTCCACGGCGAGGGGCGAAGTTGAGGGGACGGCGTGGCTTCTTTCCAGGGGCCG	1B	133.701
1267789	TGCAGCCTGCTGAGCCTGTATGTAGGCTTGAACATCGTCATCGTTCAGCTCAACTCCAACATCATCACG	1B	135.075
1164511	TGCAGGCCATTGAGGTACTCATAGTAGAGATGCAAGTCTTTGGGTTCAAGTACCAACAACAGCCACCGA	1B	136.802
1269329	TGCAGCTAACGTGAGGTGAGGCCGCGGGGATTGCAGCGAGTCACCGTGACGATGACTCGGGGTAAACCC	1B	136.825
5567902	TGCAGGGGAGCAGCACGGTGGTGGCCG	1B	137.912
1075055	TGCAGGTTCCCTTGCCCTCTGCCGACCACTATGGCAGTGTGATGGTGAGGGAACCCTGGATATGTGTGT	1B	142.383
4412053	TGCAGTACGTCAGGGGAGCCGAGTCCGCCCG	1B	143.845
4542723	TGCAGTCGCCCGCCGCCCCCCTGTAGTCCACCCCG	1B	144.752
3954099	TGCAGCCCGTGCGTGCCCGTGCACGTGTCCGTGCCGCCG	1B	145.669
1101205	TGCAGTCGCCACCCGTCGTTGCTCCTCCTCAGCGTATTCGCCGCTGACAACAAAGCCG	1B	145.872
7346349	TGCAGGATCGAACGGGACCCCG	1B	146.841
2276196	TGCAGGTCGAATCGATCGAGATCACAGGCCATACGCAAATACCAGCGCCAGCACAGAATTCCAACCCAG	1B	148.833
1126410	TGCAGGCAAACCACACTGACGGCATGTAAATTGATGAACGACCGAACAGCGGTCCTCCTCGCCG	1B	150.345
1128096	TGCAGGCTTCCTCTGGCGCTGCTTTGTCTTGCCCGTCAGGTAACACGGCGCCCCG	1B	151.734
12471086|F|0-9:T>C-9:T>C	TGCAGCGCCTTGTTAGGCCG	1B	154.756
1299157	TGCAGCAGCTGGGGACCTCAGATCCAGCTCCTAGAAAGAGCGCACTGCTGGTCCG	1B	155.159
3384781	TGCAGAGTAAGCGTCTGACCTTCAGACTACTCACCATCACACCG	1B	155.935
3021884	TGCAGTAGAAGCATCTGATAGAGCTGATGTTGCTGCACCG	1B	156.705
4008669|F|0-18:C>G-18:C>G	TGCAGCGCGAGCGTGACGCCGATGATGACCAGGAACATCCTGTTCTTGAGCACCCCG	1B	157.918
4002083	TGCAGGTGAGGAGGGGCGGCAGGTGGTTCCCGCTGGATCCGCTGCCG	1B	158.432
1020261	TGCAGTCGCAAGCTCGGGGGAGAGCGAGTGTGGCGGCGACGGACGCGGGGTTTGTGGCGCAGATTGTTG	1B	159.017
3944440	TGCAGCATTTGCAGCTGAATCCATGACGAGCACGTACGCCTGTCTCCG	1B	159.542
4404950	TGCAGGTTTCATAAGCATAGATTGCGGATTTCCG	1B	160.892
12765809	TGCAGAGGTTCTAAACAACACATTAGTCAAGGCCG	1B	162.791
991353	TGCAGACGCCAGATTCATACATGTACCCCGCGCATCCACCACGGCAGGAGCCTTCCTGCCCCAATGAGC	1B	163.316
2275207	TGCAGTGATTTGAACAGATCCATTCGACTATTCGTTGGAGCCACTCCAGCTAGCTAGCTATCATGTGGT	1B	164.433
1262196|F|0-66:A>G-66:A>G	TGCAGGGCACGGGGCCGCCACGGAGCGCGGGCGGGCACGGCCAGAGGCTGCGCGGCGCGGAGGCCGAGA	1B	165.79
4993260|F|0-5:A>C-5:A>C	TGCAGAGCCCTTGCCGCTGTTGCCG	1B	166.752
3947207|F|0-17:C>G-17:C>G	TGCAGAAAAAGTAGGCACTACAACAAAACCG	1B	168.186
1218849	TGCAGCCCCCTGCGTACAAGCTCTCCTTCCCTGGGGAGACTCGCCGCGCGCCATCTCCGTTACTAATCA	1B	171.239
5569487	TGCAGGACACACGCCTCCTTTCCG	1B	171.991
1250027	TGCAGTTCAGTGAGTTTGAGTCGGATTTGGAAAGCGAGGGAGAGATGACCG	1B	174.869
4260633	TGCAGCGGCAGCGGCAGCGGCGTTCACACGCGAGGAAATAGATCGAGAGAGGGATCGAGGCCAGAAAAA	1B	178.887
3949874	TGCAGGAGCTAGCAATGCCCCCCAAAGCATAAAACCG	1B	180.644
3935151	TGCAGGGTTCGCGTGTTCTTTGTGCCGTCTCGTCGGGGTATCCG	1B	181.33
1059913	TGCAGCTTTGTTTGGTCTAAAACTACTACTGTAGTTAATTAGCAGCAACTGGAACTAACGGCCG	1B	182.892
3937954	TGCAGATGGTGGAAATCAGCTCATCCTACGGACCCCG	1B	183.504
3533994	TGCAGCACGTTGCGCGCGAGGTCCAGCGAGACCAGGCCG	1B	184.144
5324058	TGCAGCCGTGGCGCGCAGCGCCG	1B	192.528
21743492	TGCAGTTGATTCCAGTGGGCCG	1B	195.354
1105562	TGCAGATTCGGATGAGTGTGGTCCGCGCGTCACCCACACTCGTCTCCTCCCGTCGCCG	1B	199.228
1034524	TGCAGGAGGAGCTTGTCTTGGAAGACGTTGCTTGGTACAATGGAGTGCTTTACTTGCTGACGAGTCGGG	1B	203.131
1201554	TGCAGGGACCTTCGCATCGTACATGGTCGTGAGCGCGTTCGCCCTCGTGTTCGTCATCCTTTGGGTGCC	1B	203.68
1261151	TGCAGCGGAGGACGAGGCATGGATGCACATGATGATGGTCTGATGGACCTCTGCACCG	1B	207.102
6048609	TGCAGGCCCTGCTCGCGCACCTGTGGCGCGCGGTGCGCCG	1B	208.068
3958668	TGCAGCAACAGCAGCGGAGGATGTGGTAGACCTAGCCCG	1B	212.803
4009104	TGCAGGAGGCCTGTCATGCCG	1B	214.496
1102414	TGCAGAGCGGGCAGGTGCTCTTGCTCTTGATCCACAGCGCGAGACAGCCCCGATGGAACACGTACCGAG	1B	215.594
1164928	TGCAGCTTAGGTTGTCACACAATGGAACGCTAGAAATCATTGCGGTAGCCG	1B	216.684
5410371	TGCAGGCGTCACCGACACCTCCTCGATCAGCTCCTCTATATCTGGATAGGTGGCATGGTAGTCGACGGA	1B	220.411
3936452	TGCAGTGTCGCCGCGCGCCGCAGCGCCACGAGCCCGATGGTGGACCG	1B	221.611
5563187	TGCAGAGTTGGACTTGGAGTGCTCCTCGTCGTCTTCCTCCCGCTGCTTGAGTTCGATGGTGCAGTCGAT	1B	222.719
3064765	TGCAGTTCACGCTCGCCCGCCCTGGTTAGTCTGGGGACCAGACAACCG	1B	229.252
5360124	TGCAGGAAGAACTGGTGTGTGTTGCTCCG	1B	231.02
19324042	TGCAGGGCCAGGTGCAAAGCCG	1B	236.902
3533419	TGCAGACAACCGATGGTGGTCTCGCGTTGGTCAGGAACAGCCG	1B	239.578
5968847	TGCAGCTGAAGGTAAAAAAAAAGGCCG	1B	243.838
4262249	TGCAGATTACTCGTCATTTTTCGCGAAAGGAACTACCG	1B	247.694
3022546	TGCAGATCGAGGAGCAGCTTAATCAATGTGTACTGTAGCCG	1B	249.921
1018209	TGCAGACAGTGCGGATGGTTCAGCAGCTCTGCCATCATCCACTCCACGGTGGTGGCCGTCGTGTCCGAC	1B	251.551
5991225	TGCAGCAGAAGTAGTAACCCTAGCTAGAATGCCCAGACCGAACATTAATCAAAAGCTGGCCCG	1B	254.491
1379914	TGCAGGCCGTAAGACAAAGAGTTGACGACCAAACACACACAGGCAAGCGCTCCCTGGGCCAGACCATTC	1B	258.814
4396047	TGCAGACTTGTGTGCTCGACACCCG	1B	277.921
4992081|F|0-8:G>A-8:G>A	TGCAGATAGGGTTGTGATTAAGCATACCTCCCG	1B	279.775
1228851	TGCAGGGTACGAGAAGTAGACCAGCTGCTGCTGCGGTTCACACCGCCGCAGGCGCCG	1D	0
1043427	TGCAGTGTCAGGTTGGTTAGTAGCTACTAATGGACAGCTACGAATGAAAAGAAAACGAAAATAAAGGCC	1D	1.863
1272027	TGCAGGCGCTTGCATAGGCGGCAGTTGAGCAGTAGCGGCGCGGCGGCGCTGCTAGTGGCCG	1D	6.762
1083021	TGCAGCTCGGCCGCACGCGCCGCTGCGACCAGGAGATGGCGCCCACGCCGCCG	1D	8.161
1123046	TGCAGAGCGGGCAGGTGCTGTTGCTCGTCATCCACAGCGCGAGGCAGCCCCG	1D	10.196
3937555	TGCAGCTCCCCCGCCCCTGTCCCACTCACCG	1D	10.407
1117038	TGCAGTGCAACGGTCGGTCTGCCGATGGAGTGCGCAGCCGCCCGTGCTGCAAGACAACACCCACCGAGA	1D	11.747
3954969	TGCAGGTGCAGCTTGCTAGCCCGACTTCGCTGCACAGCTGACCG	1D	13.142
1215709	TGCAGGAGGAGCGCGTGATGGCCATGCTTCGGACCTGTGCGCGGCGAGGCGAGGGCGGTGGTGAGCCGA	1D	18.619
4991047	TGCAGGGAGCGGCTCGATGGACCG	1D	19.273
3222502	TGCAGCAAGTTGTCGGGCGAAGATCCAACGAGCGTTCAGGCGTGGTCCG	1D	20.459
7358429	TGCAGCTGGGCTGGACGCGCCG	1D	21.739
3938773	TGCAGGTTTGCAATGCAATGCAACACTTCATTCCG	1D	21.76
1092377	TGCAGAAGAGACAGGGCATGGCTCCTGCTGCGGTGCGGAGCGCCGATTGTGAGCCG	1D	22.85
1201492|F|0-45:A>G-45:A>G	TGCAGGCTCGCGCTCCGCTGCTGCCACAACCTAGCCAAGGTATTCATCGCGGCCGACGGCAATCTCCAC	1D	24.656
4991062	TGCAGGTGCGCGAGTAAAGCGATCAAGAAACTGCCG	1D	25.31
3222341	TGCAGCGCGCGCGAGCTCCGTCCTGGGCGCACGAACTCCG	1D	25.806
1123464	TGCAGGATTTGGAGTCTGTGGAATGAGGTGACACATGGTAAAGATGTCCTTGACAAACGGTTCTCTGGA	1D	26.289
1032466|F|0-11:T>A-11:T>A	TGCAGTTGGTGTGCTCCAGGACGCGGAGGGTCTCTGAGGGCAGGGAGCCGAGACCGAGCGGGTAGATCC	1D	26.938
3533398	TGCAGCGCCAGCCTCGCCATCGTCATGTATTTCGAGGCCG	1D	27.344
3024430|F|0-5:T>C-5:T>C	TGCAGTGCTGCCTAGCTAGTCTTCGCGCTGCTTGGCCG	1D	27.881
4991944	TGCAGGGCCACGTCATCCCCGTCACGCACCTCGAGCTGCGGCTGCCG	1D	28.332
4910103|F|0-65:G>C-65:G>C	TGCAGCGGGTACACCACCACCACCGCGTGCGGCTTGGCCTTGTTGCCGCCGCTCATCGCTGCTAAGCCG	1D	28.88
4910343|F|0-5:A>G-5:A>G	TGCAGAAAGCGGATGCAGTCGGTGGAGTTGGCCCG	1D	29.508
3064683|F|0-24:A>G-24:A>G	TGCAGCTGTTCACGCGGCTCACGCAGCTCTGCTCTAACCTAACCG	1D	29.814
1057945|F|0-61:C>G-61:C>G	TGCAGCCTTCTTCATATCTGTTTCTGAGGCCTATCCGACAACACGCCGCACCATCTGTTTTCTGAAACC	1D	30.213
1110095|F|0-14:C>A-14:C>A	TGCAGAAGAAGAACCTGGAGGAGTCTAACTCTCGCGCCGAGGTAGATTAATCCGACCG	1D	30.43
1258947|F|0-7:C>T-7:C>T	TGCAGCTCGCCGCGCTAGCAGCAGGCGTGGTGGCGTTGCTGGCGCTGCTGCCTCTGCTGGAGCCGAGAT	1D	30.561
4993247|F|0-5:A>G-5:A>G	TGCAGACGTTAGCTGGGATTTCATGCCCG	1D	31.587
2290121	TGCAGGCCTCCTCGAAAGGGCATTCTTCACCCTTGCCCTCCGACCATGGATGTGGCAAGCCTAACCGAG	1D	33.199
5411421	TGCAGCATTGGAAGGTTGTCGCTATTGTGGCCG	1D	33.359
7349700	TGCAGCCGCACCTGATGGGCCG	1D	34.374
1230368|F|0-42:A>G-42:A>G	TGCAGCAGGCGCACCCTCCGCCGCCGCCACCACCAGCTCGCCACCCACCG	1D	35.509
5573146	TGCAGCACGTCTGATAGCCTTTGGAACCG	1D	36.773
2242558	TGCAGAATCCGCGATTGTTCGAGCCAAGCTAGGAGACGTGTTTCTCTGCTTGCTAGTACTACTCAATAA	1D	37.554
3020458	TGCAGTTAGTGAATACTTCATTTTACTCTAATGCACAAACAACCG	1D	38.821
1693122	TGCAGCCGAGAGTGGACGGAGGAGGAAGCACAAGAAGGGAAGGGGAAGGGAGCAGCGGCCG	1D	38.848
3533707	TGCAGCCCCCAGCCTCGCGCGCCTCCTGCAATTCTCCCGCACGAACCCG	1D	39.229
3944257	TGCAGCCAGGACCGTACGGCGCGGAGTAGTCGACGTTCTCCG	1D	39.704
7345683	TGCAGCAGCGCCTCCTGATGGCCCTCGCCG	1D	40.248
5573307	TGCAGCTATCCGCTTCTGCTTCCG	1D	41.519
7352169	TGCAGCCATGGCGAGCATAGTGGCGTGAGCAGCCG	1D	45.271
5573389	TGCAGGACAAGCTCGTTTTCTTGGTTCCTTCCTCCG	1D	45.806
1104328	TGCAGCACCCATGGCCTCGGGCACTCCTGACCAACCAGGCACTCACCTCCG	1D	47.769
5412002	TGCAGCGCACACCCCCTGCCGCGATTTGGGCCG	1D	55.669
3936813|F|0-7:C>T-7:C>T	TGCAGTCCACTGCTAGTTCTTGCGGGGGAGGCAGTGCTGCTCCG	1D	56.778
1100775	TGCAGGCCCATCATGAGTATTTCCACCAAGCACATCTTCTTCCTGTTGCCG	1D	59.162
2299782|F|0-28:C>G-28:C>G	TGCAGCGGCCGTTCGACGAGGCGAGCGGCGCACGGTACAGTTTCAACGGCACCGTGCGGAAGCTGTGGG	1D	59.414
4439761	TGCAGGGTAACAATGCGACATAAAAAAGTCCG	1D	68.695
5968471	TGCAGGCGGCATGAAGGAAACATTGCGGCTACACCCGCCG	1D	70.688
4911185|F|0-23:T>C-23:T>C	TGCAGCACCTGCTGGGCGTACTCTGGCGTCGATACGGCGAAGGTGTGGACCTTGCCGAGGCGGAGGTGG	1D	73.554
21743489	TGCAGGGGCGGCAGCGGCGAGTTGAAGGCCG	1D	84.6
17577605	TGCAGTAAACTTCAGAGGGTGATTACCATTCAACCG	1D	87.284
3027700	TGCAGAATCCTTCCTCCCGTGCCATAAGAAGTCGCGGATGACCCG	1D	94.238
4394954	TGCAGCACGGGATCCCAATCATGTCCG	1D	104.748
7345904	TGCAGCGACAAAAAAAAACCCGACCCCG	1D	109.007
4541801	TGCAGCACGGCCACGCGCCG	1D	112.437
1316138	TGCAGCAGCAGCAACTCTGTCTCTGTGGCAGGGTGGTGCCAGCGCTGAAGAGCAGCGCCG	1D	116.811
5324034	TGCAGCATCGCGGCTGCTGCATCGCAGCTCCG	1D	116.864
21743487	TGCAGGAACTCTAACCTGCTAAGCCGCCCTCTTCTTGGCATTGCCAAGATTACCTCGACCG	1D	117.592
1102854	TGCAGGTCATCCTCGGAACGTCAAAAAATAGTCGCTAACAAACGGAGTCAAACCCG	1D	119.007
3949056	TGCAGCAGAAGCAGTGCAGCCGGCACCAGCACCTCCTGCTGCTTAACCG	1D	119.586
1233583	TGCAGAAAGAATTGGATGACCGTGCCCGTCAACAGCCAAGCTCCAGTCGGAACCG	1D	121.254
3936514	TGCAGCCGGGATGAATCAGTCTTACCAGAATCCACCG	1D	122.209
4262508	TGCAGGGAGCTCCTTGATAGCTATACCG	1D	128.466
21743548|F|0-16:C>G-16:C>G	TGCAGTGTTTTTGTCACGTCAAAGCTTTTTGACCGCTTCTTTTTTCCAAAATGCCCGTTGGTAATTAGC	1D	136.314
1396882	TGCAGCCCAAGGAAGGGCTTGCCATGGTGAACGGCACGGCAGTGGGGTCCG	1D	138.688
1133992	TGCAGGAGATGGAAACCCTCCACCGCTGCATCAAGGAGGTTCTGCGGCTCCACCCGCCG	1D	140.031
1119069	TGCAGAGGTGCCATCAAGTGTTGTTCGGTTAGGACATCTGATGTGCCTATATGTTGATCCG	1D	141.41
1094078	TGCAGCGGATCCCAGCAACACTTTCCATTATCTGCCGTAGGAGTTGGTGCCCCG	1D	142.596
3954969|F|0-11:C>T-11:C>T	TGCAGGTGCAGCTTGCTAGCCCGACTTCGCTGCACAGCTGACCG	1D	143.299
1065155|F|0-25:A>G-25:A>G	TGCAGGCACCAGTTCGTATCATCCTAGTGCTGTGTATGCTTAATCTGATGGCAACATTCATGATCATCA	1D	144.29
3940296|F|0-22:A>G-22:A>G	TGCAGCACAAGCTTGTTAGCTCACTCCACGCCG	1D	144.567
992285|F|0-29:T>C-29:T>C	TGCAGCGTTGATGCAAAGGTTTCATAGGATGGGACAGCAGCAGGAACACCG	1D	144.567
3533149	TGCAGATTCCGCTTCCCTAGTGCAATTCCTAGAGCCG	1D	144.697
1251811	TGCAGTTTCTTATTGGTTTGCACGGAATCCATCGCCCAACACCTGGCCTGTGCGCAGCAGTGGTAGCGA	1D	146.479
1204511	TGCAGCAGGGGCCTCCCTCCTCCGTTTCCCAGAGCCCGCAGCTAATTCGCCATCCG	1D	147.087
7348209	TGCAGGCGCCGCAAAGCAGAAAACAGCTATAACCG	1D	148.522
4260756|F|0-30:G>C-30:G>C	TGCAGCCACGGCGTGGGTCCGGACCAAGAAGGCGTGGCTACCAACCG	1D	151.693
1249957	TGCAGGCTGCGGAGGCGGGCGCACGGGCAAGGGTGGCAAGGAAGCCGTTCAGGGAGCGGCTGGGGACCG	1D	153.545
1096247|F|0-42:C>T-42:C>T	TGCAGCGGGTACACCACCACCACCGCGTGCGGCTTGGCCTTGCCGCCGCCGCTCATCGCTGCTAAGCCG	1D	155.337
4910103	TGCAGCGGGTACACCACCACCACCGCGTGCGGCTTGGCCTTGTTGCCGCCGCTCATCGCTGCTAAGCCG	1D	155.481
4991432	TGCAGAGGCAGCGGTAGCTAGCGAAGGACTGCACAGGCAGCGGTAGCTAGCGGCGGACGGTGGCGGCGC	1D	155.721
4992819	TGCAGGCATTTGAGATTTTCAAGACCATCTGGAAGAGAAACTGCTGTACCAGGTTCCG	1D	156.037
3936813	TGCAGTCCACTGCTAGTTCTTGCGGGGGAGGCAGTGCTGCTCCG	1D	156.372
1089532|F|0-30:G>A-30:G>A	TGCAGTTAACAAATGAGTACCATCAAGAGTGCAACCGACCTAATAAAACAAATGGACCTTCCTTCCGAG	1D	156.829
2303197	TGCAGGGCCGTCGAGCAAGGAAAACCCTATTTGCTGCACATGGCAGCAAAATAGCCG	1D	158.045
5350171	TGCAGGACGCGACACGAAAAGTGTCGGTATCGTCCG	1D	159.44
3937865	TGCAGCCATCCTCGTACTCTTCACATTTGCTCCG	1D	160.075
1208518	TGCAGGGTGAAGTGGATGGGCTCCGACTGAGGGGTCATCAGGACCAGCTCCCCG	1D	162.202
1091912|F|0-10:C>T-10:C>T	TGCAGCACGGCCGCGGCGACGTTGGCCCACACCAGGTATACGAAGGCGCCGTAGTCCCG	1D	163.122
978579|F|0-45:G>C-45:G>C	TGCAGGTGAAGACCAAGCAATGGCTGAAAATGCTCACTACGCACAGACAGTCTCGCTGATCCTGCACCG	1D	163.918
1066214	TGCAGCATGCAGAGTAGGTAGGGCAACTATTCCCGACCAACTTGTCAGGCCG	1D	165.207
4910607	TGCAGGGGGAGAGAGAGAGGGGTTGTGGGCCG	1D	166.796
7351912	TGCAGCGGTGAAAGCATCTCCGCCACCG	1D	167.637
5332971	TGCAGGAATGTGCAGCGTCATTGACGTCCG	1D	168.359
1081628	TGCAGGGATGCGGCAAAGGGGGGAGCGCGACTCTAGGGAAGGCAGGCGACAGACAGTGACAGGGGGTGG	1D	168.882
3951542	TGCAGGGCACCTACAAGGAGAGCCAGAGGTCGAGCTGTCGGGCTGCCG	1D	169.649
1155400|F|0-43:G>C-43:G>C	TGCAGCCCGTCGTCTTCCTCCACGGCGGCCCTGGGGCCGGCACGTCGCCG	1D	169.812
1072476	TGCAGTTATTTGAGCTCTGCTGCTCTTTTGATGCACTATCCCCTGAGGCAGCAGGTTTCTTGTCCTCCG	1D	170.797
1076412	TGCAGCTGTACCCACTCCATGGTCCTCTGAAACGCCTGCATCTACATTTATTTTCACGGTTCCTTCCGA	1D	171.402
986147|F|0-38:T>G-38:T>G	TGCAGTGTGAGGAAGACGGGGGCGTCGGTGCTTGCGTCTTTCCTGGCTGTGTGGATTGTGCATGAACAA	1D	172.273
997489	TGCAGCTTAGGTTGTCACACGATGGAATGCTAGAAATCATTGCGGGAGCCG	1D	173.661
1053578	TGCAGCCATTTGCAGGGATCGGGGCAGCAACTATCTGGGCTCGTCCATATTGGTGATCCAAGGGCTTTT	1D	173.779
1001070	TGCAGTAGCTCGCTGCCGCCGCCGCCTTGAATCTCCTCTCCACCCTGCCG	1D	174.424
7930010	TGCAGCGGGGGGATCAACGGTCCG	1D	176.9
1261870|F|0-41:A>C-41:A>C	TGCAGTACCAGTGCTGCTGGCAGTGAAGCTGAGCTACTAAAATTCGTCTGTGCAGGTCTCGCGGCGATC	1D	179.369
4993873	TGCAGGTTGGGGGTTGCGGCCGTGGTCGGGGGCGGACGCCG	1D	181.527
1163552	TGCAGCTCGGCATGACGCTCGTCATTTACTGCTGTCACTTCTCTGGGCCG	1D	182.48
5332388	TGCAGGCTGCGGCGTGAGGAGGACTCCGCGGCCG	1D	187.932
3952338	TGCAGCGGAGGGCTGTTATTGATGCTGCAACAATTGCTGGTCTCCG	1D	188.59
1093183	TGCAGAGCGGGCAGGTGTTGCTGCTCCCGATCCACAGCGCGAGGCAGCCCCG	1D	190.401
5331534	TGCAGACTCCTCGACGAGCCTCCGCCG	1D	191.223
5323603	TGCAGCTGCCGCCATCCCTACCACCCTGTGTCGCCG	1D	197.505
1057346	TGCAGCCTCCATCATTCGCTTCTTCCCCAATATCTCCATGCTTGGAGCTCTCATCTTCAGACACCACTT	1D	209.309
3947639	TGCAGTGCACCCACCAAGGTCAGTTGGGACGGCCCCG	2A-1	0
5371578	TGCAGATGACTACTACTCCGCGGCGCTGCCG	2A-1	9.007
4990919	TGCAGGCCTTTGTCACGCCACGGTTGGCGCCG	2A-1	16.851
1111139	TGCAGTCGCCAGCGCGTTTCTCGTCGCTCGCAGCCTGATCTCTCCCTCCG	2A-1	22.425
3022238	TGCAGAGCGCACATCGTAGTTCTTACATTCTCTTGAGCAACCG	2A-1	25.303
1103797	TGCAGTGAAAACTAATGGTCGCTGATTTCCAAGATGTCATCCTTTTAAGACCG	2A-1	30.5
4407250	TGCAGAGATCAAGAAGAGATCGCCG	2A-1	31.374
5011517	TGCAGCGGATCCCAAATCGGCGCGGTTGCCG	2A-1	32.765
7352715	TGCAGTGGTGGTCTACTTGGGTCAACGGTGATGTGCACGGGCCG	2A-1	34.973
3954051	TGCAGCACGTCCAGGCGCAAGAGACCG	2A-1	36.184
3958725	TGCAGCACGGCACGGCATCGGAGTGAGCCCCGCGGGTCCCCCG	2A-1	38.528
3027270	TGCAGCGGCCCTCCCTGGTGTAGATGTGGTCAAAAATCCCGTGCCG	2A-1	40.227
3024109	TGCAGGTGTTCGCTTTTCAATCAACTTAATTGTCGTTTAGGGGCCG	2A-1	43.422
1125294	TGCAGGAAGGTACCTACTTGGCTAGTTGCGCATCTCGCAGCGTCCGTACACGCGCGATCGCCG	2A-1	44.767
4003219|F|0-10:G>A-10:G>A	TGCAGCTGCTGGTTGGAGGTGACCG	2A-1	47.388
997272	TGCAGGTCCTTGCAACTGCATATGTGTTGTATGTGTCTTCCATCTTCGGCAGCCG	2A-1	48.196
2279498	TGCAGTCGTCTAGGAGCGTCAACTACCGCTCGATGCCTCTGCGGAACAGAGAGGTGAGCGCGTGCCGAG	2A-1	49.642
6042987	TGCAGCCTCGCGTCCGTGCACCAGCCGCCGTCGGGGCTCGCGGGGTTCGGCCGCGGCGCGCCGTCCGTT	2A-1	50.916
1015564|F|0-35:G>A-35:G>A	TGCAGCTGCGGCGAGGAGGCGGCGAGCGCGGGCGGGATCTCCCAGCCGCCG	2A-1	51.059
5370736|F|0-7:C>T-7:C>T	TGCAGATCGGTCCCGATTTGCGTGGCCCG	2A-1	51.492
1089389|F|0-27:G>T-27:G>T	TGCAGTCGTGCAGGGCCGCCGTTGTGTGTTGGTGTGCTCTGCTCCGATCAGGTGGAGAGATATAACCAA	2A-1	51.576
1092022	TGCAGATTGGGTTTTTCGCTGCTGCGCTGCTGTGAGAAACGATGGCGGCGCCG	2A-1	52.401
1225787	TGCAGCTTTTTTACTGATATAGTTACCCATGGATGACAGCGGAATCTAACTCAGCTACACCG	2A-1	52.816
1669340	TGCAGACGACGGCGGCGGCGGCAATGGCGATTCCGTCTGCGTGTCTGCTTCTAGACCG	2A-1	53.226
3946769	TGCAGCTTCCACAACGAGGAGGAACCCGTCGTAGTAAGTCTGATCGAGCTGCCCGACCTTATGCCGAGA	2A-1	53.768
4407631	TGCAGGAAACCTGGATTCGGGTCTTTGGCATCCCG	2A-1	54.138
3943077	TGCAGCAGGAGAAGCGAGCGAGGAAGCGGGAGGAGCGGGAAACCG	2A-1	54.516
4991790	TGCAGCTGAGTTTATGTATCGCCAGGCACTCACCG	2A-1	55.884
4398078	TGCAGACAGCAGGAACTGCCG	2A-1	56.62
4397598	TGCAGTGTCCCACTTGAACTCCG	2A-1	56.895
3938313	TGCAGTTTTTTTGGCAACAGCAAGAACAATCCACGGCCG	2A-1	57.297
4538745	TGCAGAGACCGTGCCGTCGTTGTCATCGATCGGGATCCG	2A-1	58.698
4262425	TGCAGAACAAATCATCACATCTATCCAATTACTGAAAGAAAAAACCGCAGCTGCACATCACAGCAAAAT	2A-1	60.307
4406794	TGCAGTTTTTCCAATGAGGAACACCCG	2A-1	60.934
4910954|F|0-9:A>T-9:A>T	TGCAGCAGCAACTTCATCTTCCTCCCG	2A-1	63.16
4396549	TGCAGCAGCAGCTTAGAGAGTTCCG	2A-1	64.973
7352055	TGCAGGGCGGAGAGGTTGCAGAAGATAGCCGCCG	2A-1	67.952
5578400	TGCAGTAAGCTCAAGGGATGCATGCCG	2A-1	71.404
1125099	TGCAGGCCACGACCCATGGAAGGATGACGAGTCTAACTCTGACGAGGAGGAAATGACCCCG	2A-1	85.246
7345295	TGCAGCAGGGGCAACACGGCCATGGCCCATGGGAATACTCTCCTTCTCCTCCACCCTTTCACCG	2A-2	0
3573665	TGCAGCAGATTGTATACCTATCGCACACGCGATCGACTTGTGCCG	2A-2	1.82
3953977	TGCAGCTAAGGCCCCGCTTGGTTCGTCGTTTTGGAGCGATTTACACCG	2A-2	3.754
2256686|F|0-10:C>A-10:C>A	TGCAGGAAAACCGTCGAGAAACGGAGAGAGAGAAAATTAGCAGTGACTGCCGCTGGTTTGGGGCAGCTT	2A-2	9.98
992715|F|0-36:C>T-36:C>T	TGCAGTACCACGCAACAAGTAAGCAGCACGAAACGACGTGACGGGCCTTGTAGCCCG	2A-2	11.065
3961456	TGCAGTGTCGTGGATCAAAGCGCAATGCAGTTCAAGGACCCG	2A-2	12.735
3027184|F|0-7:G>A-7:G>A	TGCAGCCGCATTGAGTCCTATGCACTTCGCGCACTACACGCCG	2A-2	14.394
7326687	TGCAGGCAGGCCGTCGGGGTTGCGGCAGCCG	2A-2	15.219
1096734	TGCAGTGAGTGAGCGAGTCAGTGAGCAGATGATGCATGCGCGCCCTGCTCGCTGGTGCGCCAGCCCGAG	2A-2	17.553
5365250|F|0-52:G>T-52:G>T	TGCAGCAGGACCAATATAGATGCCCACAAAATTAGCTACCTGTCCATCTAATGTAGACCTAACTTGGTA	2A-2	18.339
3064873	TGCAGCCGTGCTGGACGAAGGTGGCGACAAGACTGACTGACCG	2A-2	18.489
4009322|F|0-44:T>A-44:T>A	TGCAGGAGTTAGCTAAGCTAGGCTCGACGGTTGCAAGAGTGAGTTGGTTTAGTTTTAGGTTCTGGAAAT	2A-2	19.328
2254084	TGCAGAAATCGACAAATGTGATGTCGATGTTGGCCCATAATGCACCTTGAGGTAATGAGATGGCTTGTG	2A-2	20.657
3936632	TGCAGTGCAGTGCACCGTCTGCTCCAGCTCGGCAGCGCCTAAGCCG	2A-2	21.469
1098195	TGCAGCGCCCAGGCAGCGGCGGTGGAGAGCCACGGCAGCAACGGCATGGTGATGAACGGACTGCCCATC	2A-2	22.897
1083942	TGCAGAAGTCCATGGATATCGGTGGAGTACAGATTTTCCAGGTTGACCCACCTCATGAGATGTCCGAGA	2A-2	22.928
1240206|F|0-42:C>T-42:C>T	TGCAGAAGATTGTGGCCGATGAGGAACTCCATGAGAGGTACACCGATGAGCTCGTAAAGCAGCTCAGAT	2A-2	24.836
2292409	TGCAGCCCGACCTTCCTCGCCTCCATGATGAGGCGCGCGTTCGGCCATTGGTCCCCCAGGATGGGCAGC	2A-2	26.56
4406518	TGCAGCGCTACCCAACCCAAACCAGTGATCCG	2A-2	26.776
1104543	TGCAGATACATCCAGGTGGGTCTCCTGTGCGTGCAGGAGTTGCCAGGTGACAGGCCG	2A-2	28.358
4008260|F|0-11:T>C-11:T>C	TGCAGCCCGACTTTCCTCCCCTCCATGATGAGGCGCGCGTTCGGCCATTGGTCCCCCTGGATGGGCAGC	2A-2	28.787
3953083	TGCAGAGTGCGCCGAACGAGGAGTGAGCCCG	2A-2	31.648
997791	TGCAGATGCTTTGGGCACCTATCTTGCTGATGCACCTTGGCGGGCAGGCCG	2A-2	35.077
4992322|F|0-25:G>A-25:G>A	TGCAGATAGAAAAAAAGAAGGAAAAGTCATGCGGGACCCATCATATACATGTGTCTTGCGTGGGGTGGT	2A-2	35.78
3064588|F|0-15:G>A-15:G>A	TGCAGCGCACCGAACGTAAAAGCATACCCAGCGAGCACGCACAGGCCCGCCGCCATGCTCCTCCTCGAG	2A-2	39.872
3946769|F|0-29:C>T-29:C>T	TGCAGCTTCCACAACGAGGAGGAACCCGTCGTAGTAAGTCTGATCGAGCTGCCCGACCTTATGCCGAGA	2A-2	40.709
6048783	TGCAGCTTCCACAACGAGGAGGAACCCGTTGTAGTAAGTCTGATCGAGCTGCCCGACCCTATGCCGAGA	2A-2	41.1
3020554|F|0-29:C>T-29:C>T	TGCAGGTATGTGCAACAGAAGTTCAATGCCATTTTCCCCG	2A-2	41.32
4009271|F|0-32:A>G-32:A>G	TGCAGCCGACGTGCGAGAGAGGGCCGAGGCGGAACGGCGAGCCG	2A-2	41.519
1126296|F|0-25:T>C-25:T>C	TGCAGCTTCTTCTCCTCCCCCAGACTGCGTCTGCGTCCTCCGATCCATCGGAACAGAAGCAGGGCCGTC	2A-2	41.775
1240563	TGCAGGTCCTTGCATATGTGTTGCATGTGTCTTCCATCTTCGGCAGCCG	2A-2	42.156
1021420|F|0-28:G>A-28:G>A	TGCAGCTGGTCTATCTGGCGGCGGCCACGGTGTTCTACTACGAAGCCATGGAGAGCAAGGAGGTGGTGC	2A-2	42.293
4992711	TGCAGATGGCCTTGAATGCTGCTAAACGAGGCCG	2A-2	42.388
3942275	TGCAGACTGTAAAGACGGAAGCATCTCGCGTACCG	2A-2	42.419
2253931	TGCAGCCTTCGCCACACGCACGAAAACAACCTTGTCAAAGCAAGCAGGCATCCTCTTCGATCTCCTCTT	2A-2	42.952
4993398|F|0-48:T>C-48:T>C	TGCAGTATCGCTGTCATTTTATCATCCGTGCCCTGCCCGTGATCGAGCTCGAGCATGGGAAAGGAAGAT	2A-2	43.925
4409006|F|0-30:T>C-30:T>C	TGCAGACATCCTCCAGCTCCTTGAGCTTCTTCGCGTAGCCGTCCTGGTCAGCGTCCG	2A-2	44.484
1092032	TGCAGGAGGAGCAGCAGCAGGAGGAGCACGGGGGTGGCCGCCCATGTAGGCATTGCCG	2A-2	44.88
4008129	TGCAGTCGGTGTAGACGCAGTAGGAGTTGTAGCCG	2A-2	45.179
5324992|F|0-22:T>C-22:T>C	TGCAGCTTCGGCGTTGCAGGCGTATAGGGACCCG	2A-2	45.664
4909542|F|0-9:G>A-9:G>A	TGCAGCTTCGGCGTTGAAGGCGCACAGGGACCCG	2A-2	45.664
4910082|F|0-10:T>G-10:T>G	TGCAGCTTCATTTTTGCAGGCGCACAGGGACCCG	2A-2	45.664
1087996	TGCAGCCCATGCATGTCGTAACAGTCCATGCTTCAGAGATACTGTTTGGCCCATGTTTGATTACTGTCC	2A-2	46.032
976803|F|0-19:G>A-19:G>A	TGCAGTGTCTGGAAAGAGGGAGAAGGCGCTGATGAAAACCATGTGCTTGACCG	2A-2	46.52
1209389|F|0-12:A>G-12:A>G	TGCAGTAGCGCGATGCATAGGTGATGCGCGTTCAGTTACCAGCGTTTGAGGCCGAGAGCTGCCACTAGG	2A-2	46.75
1030510|F|0-63:T>C-63:T>C	TGCAGCTGCCTTCACACTCAACTCGTGTTTACACTGGACTGGATCCATCACCACAGCACAACATGCTCA	2A-2	47.064
1218562|F|0-17:A>G-17:A>G	TGCAGCTTCACATCTGAACAACGCAGGCGTGCATGCATGCCACGGGATCGTCCTCGGCCCTCTTGCGCC	2A-2	47.064
986208|F|0-20:G>A-20:G>A	TGCAGGTGCAGTTCAGTGAGGAGGATCTCCTCCCGTGGCAGTTTTGCCTTCTCCG	2A-2	47.248
1052066|F|0-45:T>C-45:T>C	TGCAGGCTTTGTATCCAACTTCAGTGTGGATCCACCATTACTACCTGCTCAATGCTTTCAACCAATATC	2A-2	47.38
4405026|F|0-5:A>G-5:A>G	TGCAGATTGATCCTGATTTGCGTGGCCCG	2A-2	47.553
3064857|F|0-22:C>T-22:C>T	TGCAGTACCGCTGGCAGCAGAGCGGTGAACCACAACGGCGACCTCCG	2A-2	47.636
1060943|F|0-10:A>G-10:A>G	TGCAGTTGAGAGCTCTCATGGTGGTTTGTTTCTGCATAATAACCGTCCCACATCTATCCCGCCTGAACT	2A-2	47.778
2288818	TGCAGTTAGCCAGTGACTATATGTCGACCGCCAATCGGTCCCCTGCCACGTCCATGCAGACTCTGGACA	2A-2	48.206
1070859|F|0-51:C>T-51:C>T	TGCAGGTTCACCAATGCAGATTACAAGAAGCTACAAAGAATCAGCGAGACCCCCACCACGTATCGCCCG	2A-2	48.39
1022729|F|0-16:C>G-16:C>G	TGCAGGCCGCCTTCGCCGCCGCCGCGCTCGCCGTCATGGCGTCCACCGACGACTTCTCCTCCGTCACCA	2A-2	49.304
1202897|F|0-40:C>G-40:C>G	TGCAGGCCGCCTTCGCCGCCGCCGCGCTCGCCGTCATGGCCTCCACTGACGACTTCTCCTCCGTCACCA	2A-2	49.626
3026270	TGCAGGTAGATATCCCCGACAGGGTCAGATGGAACTTTGAAGGCTCCG	2A-2	51.824
3533955	TGCAGCTCGGCAACTTCGATGTCGTTGTGATGGTGTAGATGGCGCCCG	2A-2	52.579
1716715|F|0-37:T>C-37:T>C	TGCAGGTCTGGTCCGACGCAGAGGAGAAGGCACGCCTTGGCAGTCGTGATTGGGAAGGCAGCGTGCCAT	2A-2	53.015
5338356|F|0-14:T>G-14:T>G	TGCAGGCACGACCTTCCTCGAGGCGTCCTCTTCGTCAGCGGCTGCGGTGCCGAGCTCGTCCG	2A-2	54.504
21743463	TGCAGGCCCCGTCTGCCATTAGAGGCTCCACGTCAGCGTCCACCTCCTTGTCGTGATAGCTGGCCGAGA	2A-2	55.176
1105417|F|0-7:C>T-7:C>T	TGCAGGTCAACAGCAATACCTGGACGATCCTACGTAACCTGATGGCTCTGGAGGAGCAGATGTCACGGC	2A-2	57.653
1128252|F|0-16:T>C-16:T>C	TGCAGCTGCCGCCGAATATCCTGAGTTTTGAGAGTTTGTGGGAGTCGGTTTTTTCTTTTTGGTTTCTGG	2A-2	68.285
4993492	TGCAGGAGGCTTCGCGCGAGCACCCAATCTCCCGTGTGTCCACCCCTGGGTTCTCGTCATCGCACCGAG	2A-2	69.824
3570063|F|0-41:T>C-41:T>C	TGCAGGTCGGCAGCTCCGTCGTTGTGCAGTGTCGTAGATGGTGCCG	2B-1	0
4539307	TGCAGCTGGAGGTTGTGGGTACGGAAGTGAACCCCG	2B-1	6.999
1146883|F|0-58:G>A-58:G>A	TGCAGAGGTTGCAACACTTGATAGCCTGCAATATCTTCTGCTCGGTGGAAACAAGCTCGCCG	2B-1	9.278
1103326	TGCAGTTGCGTTGTTGCGTTGTCTCAGAGGGGTATCTCCAGGTCGTGCTTCACGCCGCTCCG	2B-1	15.605
21743544|F|0-62:T>C-62:T>C	TGCAGCATGCTACGTGTCAGGCGACACGTACACGTTTCAGGCGCATGCAGTGCAGGGGCACGTGACGGC	2B-1	20.172
3024459	TGCAGGGACTCGACACGTTAACGCCATGCACTGGTCGTTCCG	2B-1	21.806
1090836	TGCAGGTAGTATCCATGGATGGTGGTGAGCAGCAGACGTCTCAATGTTGACCGCTCCG	2B-1	25.535
1259974	TGCAGACGCTGGGTGAAGCACTTGGCGCAGGATCCGCACTGCATCCAGACGACGTCTCCGCCG	2B-1	26.441
7330782	TGCAGGGACACGACACGCACGTTAGCGCCATGCATTGGCCGTTCGGGCCG	2B-1	28.908
3026713	TGCAGACTCCATGGATCCGCCAGGGAATCCGCGCTCCG	2B-1	31.483
3027945|F|0-34:C>A-34:C>A	TGCAGTGCTAGCTGTGGTCTTCTTCTCTGTGTGGCGTCGGCGCCG	2B-1	32.217
3064802|F|0-12:G>C-12:G>C	TGCAGGCAGCACGCGTCGAGGGTCTCCTTGCCCACCGCCTCGTCGCCG	2B-1	32.801
1079168|F|0-55:A>C-55:A>C	TGCAGCTTGTTGTCGTCGTCCTGACGACGATGATACAAGTACTTGTCAAGGCTTCAGTTGGGCATGTAG	2B-1	33.287
978657|F|0-33:C>T-33:C>T	TGCAGGGCTGAGCTTTACACCAACGAAACTCCACCATCAGATCAGCCGTACGAACCCCCGCGGCGATAA	2B-1	33.625
5323511	TGCAGAGCGGCTGGCGGAGCGCCCGCACGTCGTACTTCTGGCTAGCCCCG	2B-1	34.51
1089997|F|0-66:A>G-66:A>G	TGCAGAAGAAAACCCAACGGGACTCAAACCACGAGCACAGCCACTCCAAGCACCAAACAAGCAGGAACC	2B-1	34.99
3028192	TGCAGCAGGTCCTGGGAGAAGGCTAGAAACTGGAGGCAACGCCG	2B-1	35.445
1301607	TGCAGGCACGGGTGCAATTCTTTGAAGATGGGCCGAGCTGGGCCGAAACTGGATGGTGTTGTATAGAAA	2B-1	35.812
3021591|F|0-7:T>C-7:T>C	TGCAGTATATTTGTCACCGCCAAAATCAGGAACCACTCCTCCG	2B-1	35.995
3027288	TGCAGCATTTTGCCGCAGTAAGTGGCACATAGGAGGTCCCG	2B-1	37.422
1086078|F|0-33:C>G-33:C>G	TGCAGAGCAAGAGCCCCAACTTCAGCAACAACCCAACAGTAGTGTCTGACATAGTGATGTCTAACCGAG	2B-1	38.844
4989033|F|0-20:A>T-20:A>T	TGCAGCGCGCTTGTGGCCGCAGGGTATGCCG	2B-1	39.307
1108695	TGCAGTGCCGAGTGTGGCACCATTTCTGCTCATCGTGCTCCTCCCCTCCTTGGTCTCTTGCACGCCATT	2B-1	39.478
1002872|F|0-19:A>C-19:A>C	TGCAGATGCGCGCGAGCGGAGACCCTTACCTACAGCACTGCGTGGAGACGGCGGCGCTGCTCGCGGAGC	2B-1	40.311
1112033	TGCAGACGCTATGCGCGATGAGCCAAGTGTCGCAGAACATCATCGAGGGGGACGGCGAGTTCATCGTGG	2B-1	40.545
3939138	TGCAGCCGAATATCGAATGGCCCGTGCCGAGGCGTACCGCATCGTCTCCCCTCCTAGCCGATGACTCAC	2B-1	40.658
1179068	TGCAGGGAGCACTGCACAGCTCATGTACTCAAAGCTGTACGCTGTGTAGTGTAGCCCTAGCTAGCTCCC	2B-1	41.122
988088|F|0-11:G>A-11:G>A	TGCAGCACCTCGTACCAGATCGTGCGTGCAAGCGAACATTGCACAACGAGATGATCCAGTGTTTCCGAG	2B-1	41.139
4004905	TGCAGCGCGTTGGGGACTTGGGAAGTCAAAGTAGTTTGGCCG	2B-1	41.324
6036484|F|0-18:G>A-18:G>A	TGCAGTGTGCAGCATGCAGCCTCCCACGTGTTGCGTCCGCGTCAGTCACTGACGCCTCCTGCCGCCCCC	2B-1	41.894
1105174	TGCAGGCGTCCTCGGACCGCGCCCAGGCGTCCACTCCCAGGCCTACCCACTGATGTACTCCG	2B-1	42.255
3947878|F|0-32:C>G-32:C>G	TGCAGGCCAGCGCCGCTGTATACTGTGATGGACAGGGAAAAGGCACGTGAAGGGAAGATACCTGTCGAC	2B-1	42.822
1036128|F|0-58:G>A-58:G>A	TGCAGCTAGTGGACGGGTCCCGCCGTCGTCGTCGTTGCTATCTTATCCCTCTCCGTGTGTGACGCCCGA	2B-1	43.153
1042631|F|0-26:G>C-26:G>C	TGCAGCCTAAACAGACAGAGTACAGAGTGCCCTTTCCTGACCCAAATCTTTGAGCAGATGTAGACTCTG	2B-1	43.523
1070207|F|0-37:T>C-37:T>C	TGCAGACCATGCCTTCGCTTCCGAGGTAGCACCCCAGTTCTGCCTCCGTCCGTAGCATATGGTGGTCTC	2B-1	45.987
2258657|F|0-36:C>T-36:C>T	TGCAGGGTGTGATGATTCGGGTGGATCGACATCGTACGCGAGGCGAGACAGAGCCGTGACGACGGTGCC	2B-1	46.713
1090570|F|0-7:T>C-7:T>C	TGCAGCGTCAAATAGGAAATCCCAAGAAAAAGAGAGTATTCCGCTACTTCTACGCGGGCGCGCAGGAAC	2B-1	47.094
1056778|F|0-37:A>G-37:A>G	TGCAGCCTTGAAACGGTTGTCTCTGTTACACGCCGTCAGGCCCATCTACTGCTATGCCACAACACGCCG	2B-1	47.101
1072123|F|0-51:A>G-51:A>G	TGCAGCACGCTCAGTTTACGTACCTTCTGATACGGTATGTACAGAAGTGTCAGTGTACGTATAGTAGTT	2B-1	47.443
2254436|F|0-32:G>A-32:G>A	TGCAGATGAAAATGCATGGTTTCTGATGGTGTGCAGTGAAAACTTACCCACTCGACTAAGCTCCATTCG	2B-1	47.825
4993505|F|0-8:T>G-8:T>G	TGCAGCTGTAGTCGTTTCCACGTGCCCCG	2B-1	48.341
6038411	TGCAGAATAACACCAAGCAAGTGGCTCGCATCATTTGACTCCG	2B-1	48.459
4910433|F|0-9:A>G-9:A>G	TGCAGCTGCAAAGAGCGCGAGCCG	2B-1	48.917
4022187	TGCAGATTCCTTTTCGTCCCGATTGTGAATCGCAAGCCG	2B-1	49.988
1220016	TGCAGTGCACCTTCTGCTCCAGCGCGGCAGCGCCTGGCAAGCTCTTTTCCACACCACACCG	2B-1	50.316
979542|F|0-21:A>G-21:A>G	TGCAGACAGTTTCTCTCATCCATACCCCTTCTCCCTCTACTCCACTCTCCCGACCTCATCCTTCCCCTC	2B-1	51.592
1298134	TGCAGAAGCCAAACGGCATAATACACGGCAAATCATAGAACAAGTATGGACCG	2B-1	51.613
1093960|F|0-52:T>A-52:T>A	TGCAGGCAAGTAGTTGCTGATTGGTACTAGTGGTTACCTGCCGCTGCTCTTGTCCG	2B-1	52.474
1150153	TGCAGTGCAGGCTCAGGCTCTCGCTCACACAAAGGAGCGAAGTGGACGTGCCG	2B-1	52.501
4911099|F|0-25:A>G-25:A>G	TGCAGCTGGATTACTCGGCGGAGCCACAGAGGATCGCCGATTCGACGGTGGTTCCGACCGTGTTGGAAT	2B-1	52.728
3027997	TGCAGCTCGAACGATCCATCCAGCACCCCGCATGTGCACCGCACCG	2B-1	52.755
1202111|F|0-5:C>T-5:C>T	TGCAGCTGGGCGGGCCTACCTGGGACGTGGAGCTAGGCAGAAGGGACGGGACGACGACGAGCCAGGACG	2B-1	53.059
1771276|F|0-53:C>T-53:C>T	TGCAGATTCCGCAGCAGCTCCCACTTGTTGGAGCGTAGAACGCACAGTTCAGCCTCCATCTTCGCCGAG	2B-1	53.334
1169049|F|0-29:C>T-29:C>T	TGCAGCCTTCCAAAAATACTGCCCAACTGCCTGTGATGGATCACCAGCTGTACGGGGACCCGTCCACGA	2B-1	54.317
4992352|F|0-56:A>G-56:A>G	TGCAGCACGAGCCCCTTCTCGCCGAACCAGTCCCGATCGGCAATGAACACCGCTCCATACCTGGAGGAA	2B-1	57.292
1117020	TGCAGTTTCCAAAAGGAAAGCAAATACATTCCAGTTTAAGAAATACACCG	2B-1	59.347
1051058	TGCAGTCATAGAGAGTTTAGTGCTAGTAGCTTGATTGAGTCCTCCAAGGACTCGTTTTGATTCCAGCCG	2B-1	60.59
1125933|F|0-57:C>A-57:C>A	TGCAGTACTACCAGCATTATTATCTCACTTGCCGTTCAGCCCTCCACGGCACGGGCTCTGCCACGACGA	2B-1	62.274
982886|F|0-49:T>C-49:T>C	TGCAGTTTTAGTTGGAAAGAAGAAACCACCCAAGCCACGGTCTACATTTTCACCATGCCTTTCCCGAGA	2B-1	63.885
4408389|F|0-25:T>C-25:T>C	TGCAGAAGGAAGACAAGCAGGACGGTCACCG	2B-1	65.166
1163153	TGCAGATCTTTTGACGCCATGGCACTAGAGGTGGCTCCTCGATGGAGCCG	2B-1	65.993
5581098|F|0-5:C>T-5:C>T	TGCAGCATCAACTACATCAGCCTCATGCAGCACCTTGTGAAGCACGACAAATAGGATTGCCGCAATTGT	2B-1	67.167
1267508|F|0-16:G>C-16:G>C	TGCAGACGACGCACACGCCGCGGTTCCTCGGGTTGAACACGGCGCTGGGCTTTAGGAACCCGTTCGTCG	2B-1	67.588
4395186|F|0-22:C>A-22:C>A	TGCAGCGGCAGTAGGGCGGCGACGGACGAAGTGGCCG	2B-1	68.036
2276444|F|0-58:G>A-58:G>A	TGCAGCAAGATTTCAAGCAGGCAATGTAAGTTCAGACGTACAGGGAATAGCAACGAGAGTGAGACGAGG	2B-1	68.73
4993876|F|0-11:C>A-11:C>A	TGCAGCGAGGTCATCTTCTTCTTTTTCTCCCG	2B-1	68.992
1204253|F|0-31:G>A-31:G>A	TGCAGACTTGGTTTGGTGGAGATGCAACCGTGGCGACGAGGAGCTGCAACCG	2B-1	69.426
1005707|F|0-55:C>T-55:C>T	TGCAGGGCCTGTCAACCAGCGCCGCTTGGGTCGTGGCCCACCTGGCGCTACACGCCCAGCCCACCGCGC	2B-1	69.938
1024991	TGCAGGGGGTTGGTGTGACGAACTGCATCGGAAGGTTGCACAGGATCTGAAGCAGAGGAGGGGGCCGAG	2B-1	70.389
7344548|F|0-5:G>C-5:G>C	TGCAGGCGCCTGTTAGAAAAAAACAGTATAAGCCG	2B-1	71.526
1058319|F|0-66:G>T-66:G>T	TGCAGTCGGATAAGCGTTGGAACCTCAGTTTTGACTTTGCCTGAAACAAGAGAAGACCATGCCAAAGTC	2B-1	72.236
3222352|F|0-21:C>T-21:C>T	TGCAGCAAGCCGTGTTATCTCCGTCTACGACTCGTTCCCG	2B-1	73.357
1258450	TGCAGGGACTTTCTCATCCGACGATTTTAAGCAGCTCTACGAGCAGCCTCGCCG	2B-1	77.378
1119471	TGCAGCAGAGTCCTGAACACCTCGGCGTCCATGTCGCCCACGCGTAGCAGTTGAGCAGTGTTGTTGCCG	2B-1	78.867
1072553|F|0-41:G>A-41:G>A	TGCAGTGAAGTTTCTGTAGCAAAGAACCACAGGGCAAGTGAGCCGACAGAGAAAAAGCACGAACGTAGC	2B-1	79.094
3064801	TGCAGGCCCGCCACTTTTGGACCTCGCACTCCAATCGCCGCATTACCG	2B-1	79.721
1096086|F|0-25:T>C-25:T>C	TGCAGTCCGCATCTGGGCGGCGCCGTGACGTGCAGGCTTGGCGTGAGGCCG	2B-1	79.892
985387|F|0-8:C>T-8:C>T	TGCAGTTTCTTTCATCAGGGAATGGCTGCTACAGATAGAGATAGGGTGACGATGCCCAGACTCAGTTGT	2B-1	80.605
1091634|F|0-20:G>A-20:G>A	TGCAGCGAGATGAAAGAAGTGCTCGCCTCAGGCGTTTCTCAAATAGGCCG	2B-1	81.71
2275327	TGCAGTTAGTTTAGCACCACAAACTGTAAAAAATCGAGCAAGAAACAGAGGATCCGCTCAGATCCGAGA	2B-1	83.316
1103810	TGCAGGCTTAAGCGATACCACACCTTGACCCCCTTCTCCGCCGCCGCGCCACCCCG	2B-1	87.889
2288878	TGCAGTTAGTTTAGCACCACAAACTGTAAAATCGAGCAAGAAACAGAGGATCCGCTCAGATCCG	2B-1	90.327
4540946	TGCAGCTAGGCAGTTAGCAGCGATCTGTGGAGCAGGCTGCGTCCTGCACGTAGAGTGTGTTGTGCGCGT	2B-1	91.175
4989011|F|0-67:T>C-67:T>C	TGCAGTGGCTGTCGGCGCGGCCGCAGTGGGCGGCCTTCGGCGGCCGCGACCACTTCATGGTCGTCGGTA	2B-1	93.483
3533724	TGCAGCCTCATCACCGCCCACATCCCCCCAGCCCCTCCCG	2B-1	96.443
7491819	TGCAGAAGCGCCACCATGTCGCGCGGGTGTGCGCCCGTGTCATGTCCG	2B-2	0
1097415	TGCAGGGGAGAGAAGGCTGGACAGAATATCACATGGGTTGACGATGACGAGAGAGAGGGGGGACCCGAG	2B-2	3.385
3028369	TGCAGCAAAGTCGGCTCTCTCAATGGCGGCCTCTGCCCG	2B-2	4.868
4407522	TGCAGGCTAAAAGTTAAACGAGCTATTTGAAGGATTTTCATCAGTGCAGGACCG	2B-2	6.032
1126009|F|0-10:G>A-10:G>A	TGCAGGGGGAGGCTCGCGCAGAGCGTAGTGGTGCAGCAGTACAAGCATGCTTTCTCCG	2B-2	6.836
981048|F|0-11:C>T-11:C>T	TGCAGATATAACCTGACGAGAAAATTCAGGATTACTTTTCTGAACAATACACCG	2B-2	7.675
3020978	TGCAGAGAAAACTGGACAGTGAACCCAATTATATGCATGCCCG	2B-2	13.546
1128195|F|0-48:G>A-48:G>A	TGCAGGCTGCATCGTCATTCATAATTGACCACTTTAATCTTGGAAGCCGTCAACCATGCCGATGCTTGG	2B-2	14.575
7490145	TGCAGTTCGTGGATGTCGTCACTAGGGTGAGACGCCG	2B-2	15.671
1023469|F|0-11:C>T-11:C>T	TGCAGTACATGCAGTTTTGGTGCAGAGAAAGCGGCGGCGACGAGGACCCG	2B-2	16.458
1113792|F|0-25:G>A-25:G>A	TGCAGATTTTGGTCAGATCCAAGGAGATCAGTTGGAAGTTGGGAAGCAGGAGCGTGCCTTGTCCGAGAT	2B-2	18.699
3944011	TGCAGTGGCGGAGGGGATTAATGGGATTAGGATGTTGGGGAGGGCCG	2B-2	20.146
4992865	TGCAGCGGGCGGCAACGACGAGGCGTGGCTTCCCCG	2B-2	21.217
4539316	TGCAGGCTGCAAGCTGTCCCCCAGCCACCG	2B-2	22.166
3948497|F|0-22:A>T-22:A>T	TGCAGCTCTGAGGATTATTTCCAGTCCG	2B-2	22.941
4993407|F|0-16:C>G-16:C>G	TGCAGCGGCGGGTGCTCAAGCTCTTGTCAAACCACACCCG	2B-2	23.691
986581|F|0-7:T>G-7:T>G	TGCAGTCTGTACAAATTACAAACTGTTCTTGTGTCATGGTGGGAATTTTCAGTGTGGATTGACTATTTC	2B-2	24.31
4993824|F|0-5:T>C-5:T>C	TGCAGTGGGCGGCGACGACGAGGCGTGGCTTCCCCG	2B-2	24.934
1096854|F|0-44:C>A-44:C>A	TGCAGGCTCCGAAATGGGCGACCGAGGCCGAATTCCAGGGTGGCCTCCG	2B-2	25.916
1020912|F|0-59:T>C-59:T>C	TGCAGCCCACATGAGAGAAGACACAGGATGAGCAATGGACAGGTTCCACTTAAAACAAGTTTGTCCGAG	2B-2	26.552
1110297|F|0-5:G>A-5:G>A	TGCAGGGAAAGAGCAGCGAAGAACAGCAGGGCAGACAGACAGACAGACGCGAGAATTCACTCACCCGAG	2B-2	27.092
3952361	TGCAGCTAGCTGCTCCTGGTAACAGGTTCCG	2B-2	29.462
1863181|F|0-64:G>A-64:G>A	TGCAGCTGTGCTCCGAGTGCTCCAGCAACCGTGCGCTCCTCGTTCGAGAAGGGGCCATCCCACCGCTTG	2B-2	29.824
995190|F|0-34:C>A-34:C>A	TGCAGCAGCCGCCTCGCTGCCTTCCAGTCAACATCTTTGCTTGTCGCGGGCGGCGACAACCAGGGGCCG	2B-2	29.981
2252726|F|0-17:T>C-17:T>C	TGCAGCAGATCATAGCATACAGGAAAGCAATTGTCCCGATTTGCTTCGATATTTTCGGTACCTACAATT	2B-2	30.65
2268151|F|0-32:G>A-32:G>A	TGCAGGGCGCTGAGCCGCTTCACGGCCGCCACGATGCCGTCCTCGAGGACCGCCTTGTACGTGCTCCCG	2B-2	31.018
1102706	TGCAGAGTTTTCTCCTGGAAGACACGGACCTTAGTGATGGCATGCTGCCG	2B-2	31.81
1107117|F|0-42:C>G-42:C>G	TGCAGAATCAGGGCTAGGGGGAAGGGAACCTTGACGGACCAGCAGAGAGCGCCCTCGCGGTCGCCGAGA	2B-2	32.656
1082485|F|0-14:G>A-14:G>A	TGCAGCAGAATTTGGTAGATTCTACTGCTTAACTCCTAACCTGTTCTTCTCATTAATCTTCTGATAAGG	2B-2	33.285
1054964|F|0-20:A>G-20:A>G	TGCAGTGAAAACGGTGACTCACAGTGCGGCTGTTTGAGGACGCTGATAGACCG	2B-2	33.569
1230029|F|0-19:C>T-19:C>T	TGCAGCGGCGGCGGGGACACGCTGAATCGCCGCACCTTCGTCACTGATCCG	2B-2	34.025
1089521|F|0-25:C>G-25:C>G	TGCAGAATACGATCGCTCAAAGTCACCACACTGGCCAAATACTTTTCACCG	2B-2	34.492
3064852|F|0-14:G>A-14:G>A	TGCAGTAGATCGACGAGGAGGGCGCCACCACCACTGTCATCAGGCCG	2B-2	35.003
997145|F|0-15:C>T-15:C>T	TGCAGTGGTCGCTGCCGTGCCCTGCTTTTGCATGCACCACGGCTACGGCCAGGCCTTGCTTGTCAGCCC	2B-2	35.442
5323647|F|0-14:G>C-14:G>C	TGCAGGGCGCGTCAGTATGAGGCCG	2B-2	35.479
7345780	TGCAGCCAAGCTGCGCCTTCTCGGTTCGAAGCACCG	2B-2	35.837
4009828	TGCAGGCGTCAATTGAGAGATTAAATTATCCG	2B-2	36.496
5332243	TGCAGGATAAAGCGGAGAAATTTGCGGTAATCCG	2B-2	36.844
986805|F|0-12:T>C-12:T>C	TGCAGCAGCACGTCCGAGACCAGCAAGGGCTCCGTCCTCTCGCTTTCTCGCTCCGACAGCCGCGTCAAG	2B-2	37.336
4991471	TGCAGAGGGTACGGCGACGCTAGATGGCAGAGGAAACAACGGTGGTAGGTGGACACGCGGTGTGCGTGG	2B-2	38.368
3936500	TGCAGGGCGTTTAACGAGCCAACCAACTCGAGATGGACACGGCCCG	2B-2	38.923
4410633	TGCAGGCAGAACGATACGTCCGCTCGACCCCG	2B-2	39.309
3961146	TGCAGCAGTTCCTCCGATGCAAGCGTTGGCTGCCGTCACCG	2B-2	39.789
1003628|F|0-47:G>T-47:G>T	TGCAGCTCGGGCCTCCAATGCTGCCGCCGTCCGCGTCGGGCTGACGCGCATCCACTCCAACCCCGATGT	2B-2	40.928
2253072|F|0-45:G>A-45:G>A	TGCAGGACAGAATAAGCCAGTGTCCATCGATTGGTTGACATATGGGCCTGATTGGACACAATAACGCTC	2B-2	41.542
7347792	TGCAGGCTGGGGAATGATGGTGCTGCTCTGCCCCG	2B-2	45.549
3939460	TGCAGCCCTACGGCCCCGACAAGGGAAGGTAGTGATGCCCACCG	2B-2	46.099
3937507	TGCAGGCCCTTGAAGTACTCGATGTCGAAGGCGTTGCTGGTGGCGTCGAGCTTGGCCGTGCCGCCGTCG	2B-2	48.109
4910302|F|0-28:C>T-28:C>T	TGCAGTGTCGGTCGCTCGATCGCGGCGTCGATGTGGGCGGGAGTGTCGGCAAGCAATCAAGCAAGCGCG	2B-2	48.845
1127292	TGCAGCAGCAGCGAGGTGAAACCCTGACGAATTTCACCGCCGAGCCGTTGCCG	2B-2	50.545
3955922	TGCAGAACGACCGAATCGACCGCGTCTTCAACCTTGGAGCCGCCG	2B-2	51.756
4664041	TGCAGAGCACTATCAAAACAGAGTAAACAGAGAGGCGCGAGGAACCCAGATCCATGGCTGCCG	2B-2	53.061
1109250	TGCAGGCCAATGGCATCTATATCTATCTATCTATCTACACGCGCTGTGCCG	2B-2	57.351
1101902	TGCAGAAAGAACCAGCGTACGTGAGCGCGTGTGCGCATACTATTACTACGTACGTTGAACACCG	2B-2	58.471
1115494	TGCAGCAACCGTAACTACTAGAGGTGACGGACACGGAACGATGTGCTCCCCACGGACCCGCCGTCCCGT	2B-2	71.049
1125778	TGCAGGTGAAGAAACGGTGCCACTGTGGACGATAAAGACGACATGCTGGACCG	2B-2	73.097
5324159	TGCAGTACTTCGACACAGAGGACATATGCCACCG	2B-2	76.055
1131788	TGCAGCCCGTGACCCCGTGTCCACCCGCGCAAGTGCGACCACGCCCTCCG	2B-2	77.749
4909615|F|0-11:G>T-11:G>T	TGCAGGTACCCGCCATGGCCATCATGGATAGCAGCCATGCGGCAGGAGCTCGCCACCGAAGTCCCCTGA	2B-2	83.543
1235357	TGCAGGAGCTTGGTCTCGTCTTTGCCCGCCACGATCGGAACCATGAAGTCCGATCGTCCATGCACCCAC	2B-2	92.172
1236839	TGCAGCTTGTGCTACTAGTACGTAGTACGTAGTACATGGGCAGCATTCATGTCGTGACGCGGCCTGCCG	2B-2	92.5
7488211	TGCAGTCCCACCAGCTGGGGAGCGCCTACTCGGCGCCTCCG	2B-2	93.8
1097543|F|0-17:G>C-17:G>C	TGCAGATTGTCCCTTCTGTGTTTAGCCTTAATTTGCCACAGTTGATTAGCCAGTGACAATATGATGGCT	2B-2	95.738
5411277	TGCAGGCGATTGAGTAAACGACAGTAGATGCTCCCG	2B-2	97.87
1125215|F|0-27:C>T-27:C>T	TGCAGTAGCAGCACATGATTCTAAAGACTTTGTGAGAGAACAAGATGGGTCCTCAACCATGCTCTAAAT	2B-2	98.72
1108614|F|0-35:A>C-35:A>C	TGCAGCGCCTGGAACGGGACCATGGCCTGATCCGTACATCCATGGACCCAGGAAAGAAATCAACCGAGA	2B-2	99.277
3025057|F|0-5:C>T-5:C>T	TGCAGCGGTCAAGGCATCAACCTCAGACTGCGCGAGCCG	2B-2	99.828
3532972|F|0-57:C>T-57:C>T	TGCAGACCGTGAAAGGGCCACAGGTAGCATGGACATCGCACTGAGATTTCGGCACCGCGTAGACGGCCT	2B-2	102.697
1117726	TGCAGCGACGATCGGTGTGGAGGTGCGACCGTTGGACTTCTAGACGAGCCACGACAAGATCAGGTTCTA	2B-2	104.17
3951119|F|0-9:A>T-9:A>T	TGCAGGGTCACCTTCGAGATCCTGGACGAGGCCG	2B-2	105.981
4406109	TGCAGGGTCTCGTTCGAGATCCTGGACGAGGCCG	2B-2	106.923
4396026	TGCAGAAGATCGTGGTGAAGCTGGAACTGCACTGCGACAGGGAGAAGCAGAAGGCGATCAAGACCGTCT	2B-2	110.214
3945440	TGCAGCGCCAGCTCCACCGTCGAGTCCTACAGCGGGCCGAGGGCCGCGAACGGGCCCCG	2B-2	115.972
3936707|F|0-38:C>G-38:C>G	TGCAGCGCCAGCTCCACCGTCGAGTCCTACAGCGGGCCCAGGGCGACGAACGGGCCCCG	2B-2	116.537
1104641|F|0-15:T>C-15:T>C	TGCAGGAAGATTCAGTGTACGTGAGCGTGGGCACATACGTATAGTAGGCGCCTGGTGTGTTGAAGCATA	2B-2	119.974
1145178|F|0-59:T>C-59:T>C	TGCAGATGAATAAGAGTTGCTTGCAGTTCTTAAACAAGGTGTTATAGATGCGTAGCTCATGATGCGACG	2B-2	123.993
4990276	TGCAGCGCGTGGGCGTGGGCATGGTGGTGTCGATGGGCGCGGTGATCGTGGCAGCACTGGTGGAGGGCC	2B-2	139.938
1095696	TGCAGGCATTTGCGGGCGTCGCTGTCCGTTTATCGTTCCGCGCACGCGTTGGGCCG	2B-2	145.139
1082029	TGCAGCGCCGTGGGCACCCTGAAGAAGACAATGTCGCCCACAGACGGCCGCCG	2B-2	147.809
1259833	TGCAGCTAATGACCACCCACACGCCAGAGTTCCTTGGACTAAGGAACGACACCG	2D-1	0
3020634	TGCAGCTTCAGGTAGACAAAATTATCAACCTCAAAGACCCG	2D-1	10.831
7352155	TGCAGTTGGCTCAATAGCTGCTGGTGGTGGCACAGTGGTTGCCG	2D-1	28.263
3021914	TGCAGGTAATCAATCCATCCCTGTTTTGCTAGCTCTTCCG	2D-1	32.358
1112673	TGCAGCCACTAGTAAGTGCCTGCCTGACCATTTCCTTTTTCTCTTCATCATCAAGTTTGTCCATGGAGC	2D-1	32.861
1119066	TGCAGAGTGCTGCATTAATCTTCAGACCACGACGAGCGGCTCAAGATCTGCCG	2D-1	34.635
3533985	TGCAGGCGCCGGGTAGCCGAGGTGCGAGGAGACGAAGGACCG	2D-1	36.483
4539447	TGCAGCATCATCACCAAGGTCACCAGCCG	2D-1	47.961
1256279	TGCAGCACGTGGCCATCGTCTTCAACGAGCTTCACAATCCTAGTAGAAGTGAAACCG	2D-1	48.318
1231587	TGCAGATCGACGGGGGCGACAACCGATTGAGTCAGTGGCGGAGCCAGCGCCCG	2D-1	49.376
4992849	TGCAGATTGTTGACGCGGCTTGCCG	2D-1	50.828
3943220	TGCAGCACGTAGGGATGACACCTGTTTGTATGGGAATTGCCG	2D-1	52.544
4261904	TGCAGCCTCCTCCACAGATCGACGTACTAGACAAGAGTCGCACGACCAAAGCACCG	2D-1	55.419
4990637	TGCAGCGCCGCACCGACTGCAAAGACTCGTGGCCCG	2D-1	56.766
12752082	TGCAGCCCACGCGCGAGCCGCCG	2D-1	57.649
3028648	TGCAGGCAAGAAAAACGAGAACCAGATCCGATCGCCG	2D-1	59.736
2322569	TGCAGCCAGCCAGATCGAGACTCAGCTGCTCCCATTCTCTGGACTCCACCG	2D-1	61.578
3936834	TGCAGCTGAGCTCCGTTGTGCCCACCGCGGTGGCTGCCG	2D-1	61.962
1090941	TGCAGGCCGAGCGTGTCCACCGACGCGGACACATCGCGGTGGAGGAAGAGGCTGTCCACGAAGTCACGG	2D-1	62.902
1127473	TGCAGTGTAAATTCTATTTGCAGTAAGACTCCAAGCAATTGTATCTGTCTCCG	2D-1	64.933
1143066	TGCAGGTCCTTGCGCCGACGTCATGGCCAAGGTCCTCACTCCTGCGCCGCCGTCTCCCAGGTCCTCGCG	2D-1	66.041
4542047|F|0-20:G>A-20:G>A	TGCAGGTCGAGCGGGGCGGTGCTCCG	2D-1	67.189
4394966	TGCAGAGGGCAGCCTGATCTGTGCACGGGCCG	2D-1	68.17
1160995	TGCAGCGGCACTCTCCCCCGTCTCTGGCCACGATGGACCTTGTCAGCTGCTCCTGGAGTCGCCCATCCG	2D-1	71.94
4539919	TGCAGGGAAGGAGACGAGCGGCCTTGGGTTGACCG	2D-1	74.97
1103039	TGCAGTGTATGAGCCCGATGCTGCGCACAGCCAGGAGCAGTGGTCGGGTGCGTCCTCCTCATAAGGAAC	2D-1	76.087
7352331	TGCAGCACACCGCTGGCCGCCG	2D-1	76.915
5411659|F|0-7:A>C-7:A>C	TGCAGCAATAGCACATAAAATCAAGCAGGTTCCG	2D-1	80.834
3949521	TGCAGATTGATTGTGTGCCCTGCTAGCCTCGTCGCCCCG	2D-1	81.244
1073422	TGCAGACAGAGTGAATCCAGAGGCCCCTAGCTGGAATAAGAGGTAAGAAGCAGAATCCG	2D-1	82.296
5324214	TGCAGGCTGCTCGTAGTGTCAGTTGGAGCCGCCG	2D-1	85.072
3943281	TGCAGTGGTGGCGGTGACGGTGGGGGAGGAGCCTGGACGCCG	2D-1	87.417
3570135	TGCAGCCGCATTGTGCATTCCTGCGCCTGGCGCGCCG	2D-1	88.018
2306473	TGCAGTTCCAGGGAGAGAGAGAGAGCTTCGAAGGCTCGCCTTTTCGATCCG	2D-1	90.711
7487939	TGCAGAGACACTTTTGGATAGTCCCG	2D-1	90.888
1092355	TGCAGTCTCATACCGACGAGGTGGTGGAGACTGCCAATGACAGGGAGGTTGCATGGACCCG	2D-1	91.07
3951805	TGCAGCATGCAGGCCTTCCTCACCAACCTCGGCACCG	2D-1	91.628
12751413	TGCAGCTTACCCCGCCAGCCTCCG	2D-1	93.234
1300410	TGCAGCGCCTGTGGCAGCTCAACGTGCTCTTGCCCGAGACCACGGGCACTCCCG	2D-1	93.531
3024321	TGCAGCAACGAGCGAAGTATTAAGTAGCTACGTACTGCCG	2D-1	94.068
1379774	TGCAGTGCGCCGCCGCCAACCTCCCACAGAGCCGCCACCTACATCCCCGCGCTGCACCCATCCTCCCAC	2D-1	94.392
1117921	TGCAGGACCTCGTAGTCCATGCGGTCGCCGTGCCGTGCCACGATCCGCTCCTGCTCCCG	2D-1	96.277
1272569	TGCAGTGTGGCGGGTCACGTGTATCTGCTCTGCTCTTGTGTCCTCAATACCATACGCCG	2D-1	97.243
4909408|F|0-25:A>G-25:A>G	TGCAGGATGGGCCCTTGTCCTGTGGACGGCGCCG	2D-1	97.876
7492658	TGCAGCGACGAAGGCGCCGAGTTCGTCCACGCCGTCGCGCCCG	2D-1	97.965
3954017	TGCAGCCCTTGCGGGTGGGAGAGTGCGTCCAATGCGTGCCG	2D-1	98.141
3021350	TGCAGTTCAGAATTCCGTTTCCATCAGCTGAAATACTAGCCG	2D-1	98.183
3026083	TGCAGACACAGCCAAGCCGCTACAGTGCAAGTTCGCCG	2D-1	98.625
5367361|F|0-17:A>G-17:A>G	TGCAGGCTGTCGCGGGCAGCGGCGCGCCCG	2D-1	98.896
3384898	TGCAGCTTGCCTGACGGTTATGTTCACAGTATGAGATCTCTTAGCCCG	2D-1	99.732
3940784	TGCAGCACTTGGCCAGGATGGCTGAAGTTCGTCGGCTGACCTGATCCCG	2D-1	99.96
4992112	TGCAGAGCCCCCAAACATGTGTGGACCG	2D-1	101.582
7488828	TGCAGCCTCTTTAGGGTGCAGCCGCCGATGTCGAGTCGGACCCG	2D-1	103.844
1104220	TGCAGGAACGTTCGGCAAGCCAAAGCACGAAGATCAAGGAATGGATGCAGATCTTGTGCCTAGCCGAGA	2D-1	104.397
5410918	TGCAGGAAACTTTGCAGGCTTGCTTTCCTCCG	2D-1	105.403
7491680	TGCAGAGGGAGTCGCAACCG	2D-1	106.068
3949033	TGCAGCAGCGGAGCAGCGGAGCAGCGTGGACTAGTCGTTTCCCG	2D-1	109.611
3937652	TGCAGTTGCGACAATGGCTCACTTGAAACCTACCCCCG	2D-1	119.548
13880727	TGCAGTTTGCCTTCTCCCAAGGCGAACACCG	2D-1	121.486
1103152	TGCAGCCTCATTGCCATGGAGTTGACAGGCGCCAAGCAACGCCTGCCAGACCAGAACCCCG	2D-2	0
7353138	TGCAGCATCTAGTCCTAATGATTTGAAGCAGCCG	2D-2	8.543
4329370	TGCAGCTCAAGGACGCGGGCTTCCACGCCTGCGTTACTTCGCCCG	2D-2	12.815
4329441	TGCAGCGACAGGTGCAGCAGCTGGTTAGGTGGCCCTGCGCCG	2D-2	15.606
4542729	TGCAGGGCCCGCGGGCGCCG	2D-2	15.904
3028019	TGCAGCCGCAGCCGCGCGCAGTTACCTCGTCGAGCTCCCTCCG	2D-2	17.703
7354356	TGCAGCGGGGTGAGGACCCTGAATCGCAAGGCGTCCACCTCGGCCGACCG	2D-2	18.838
4439876	TGCAGGCAGGAGGGACTGGGCCG	2D-2	19.621
1102380	TGCAGTCGCCCTCCACGGCGAGGCCGTCAATCATGGAGCATGAGTGCACGCATGATCGTTCGGTCCGAG	2D-2	20.934
3935656	TGCAGAAAGGGGATCGTGGAGATACAGGCGGCGCTGCCG	2D-2	23.208
4439559	TGCAGTGAGTGAGCGAGTCAGTGAACAGATCATGCATGCGCGCCCTGCTCGCTGGTGCGCCAGCCCGAG	2D-2	24.528
1228672	TGCAGCGCGTCCCCCGTCCAGGTGTAGCTGTACAGGCTCATTGGCTATTGGTCGCTGTACATGCTGACT	2D-2	26.612
7352428	TGCAGGGGCGCCAGTCGCTGGAGGTGCGGGAGCATGCTGGCAAGGTGGGCGCGGCAGCTCCG	2D-2	34.043
7492030	TGCAGCGCGCTGGCGGCGGCGTCGGAGAACCGCAATAACAACGCCATGGTGATGAACGGACTGCCCATC	2D-2	35.214
3023250|F|0-10:T>C-10:T>C	TGCAGGAAGGTGAACATTACCTGCTCTGGAGAAATCTTGCCG	2D-2	36.699
1093176	TGCAGCCATTGCTCGGCTTGTAGAACTGGATCAGGAAGACCGTCGCCGCCGTGAACCG	2D-2	36.861
1101610	TGCAGCCTTAGATGCACGAGGACGAGCGGACGACAATGGCCTCAGGGCCACGCGTTGCCG	2D-2	37.005
4542958|F|0-10:G>C-10:G>C	TGCAGGAGACGAACATCACCG	2D-2	37.024
1102900	TGCAGCCTAGGTACAACCCCGTTCTAGTCTGAAAATCACATGCTTAATTAACATCACAGTGCAAGTGGG	2D-2	37.433
4261299	TGCAGTTTCTGCTGTGGTGGGAAGAATTGGTAATCTGGTCGTCAGGGAGTCATCGCTACTTTGTTCAGT	2D-2	37.456
5350053	TGCAGATCAGCCGAAAGGGCAACGTAGGAACAAAAGAGCAGCTCCTCAGACCG	2D-2	37.684
4541798	TGCAGGCTGACCCCTTCTGTCTCGGCATTGGAGGGTAGGGGCAGTCCG	2D-2	37.925
1130396	TGCAGCTCGCCCCTGGGTTGTGCTTCAAATTGTATGTTGTAGGCTGCCCTCACCGTGTACTGACCGAGA	2D-2	38.326
3023945|F|0-16:A>G-16:A>G	TGCAGGCGAGCTGTTCAATGAAATGCTAAGTCAGCTCCG	2D-2	39.174
2305334	TGCAGCATGACGGGACCCACCGTCGAGCCTGTACCCAACCCCGCCACCAGATGCCACCAGCCGCCATCG	2D-2	40.132
1111595	TGCAGGTCTGTCGTCCTTGTCCTCGCCGCCGCCAGTCGTAAGAGCGAGCCCGAGTGCTCCG	2D-2	45.668
1028519	TGCAGATCGTGCCATGGGGGAACATGGACTGGATGGCCACCAACTTCTACGGGCAGCCG	2D-2	47.74
7346513	TGCAGGGATAGCTGCACGACCCG	2D-2	53.434
7352947	TGCAGTGTGGTAGTTCTGCACCG	2D-2	54.435
1087681	TGCAGGACCCGTACTCCATCATATCCTTGTCCGTACTGACATTGCCAAGCACGAAATGCTTAGTATCCT	2D-2	55.572
1255002	TGCAGTACTAGTGACACCCCCTGCTCCAAGCCGAAGTCCAGCAAAACCTTCTTCAGCCG	2D-2	56.701
2251725	TGCAGGGCATCGATGGTGCGTGGGTAGTGGATGGTGGCGTCGCCTGTTCTGCTGCCAGGGATAAGAAGA	2D-2	57.789
1219354	TGCAGGTAATAGAGGTCACCGCCGACTTGGCTGTGCAGCCATGGCCTCGCGTCGTAGTAGCTCCCGAGG	2D-2	58.285
4396009	TGCAGATCGCCCAAGGCTGCAACAAATAGTTGTCCCCG	2D-2	58.675
1254887	TGCAGGCGGAATCATGTTGTGGCCAATTGGTGGCTTCCGTGGAACCTATGTGCAGTACAGCTGGGCAAG	2D-2	58.881
4540842	TGCAGCTATTTTGGCAACCAAAGACCACCG	2D-2	59.371
4395056	TGCAGCTGAAATAGCAACTAACTCCCGTAATCATTGCCCG	2D-2	59.758
3938651	TGCAGCGGCAGCGACGGCACGGGCGAGGCGCGAAGCAACCG	2D-2	60.861
1255245	TGCAGACAGAGCAGAGCACCACCCTTACTGAACATCTCTCAAGATGTATGTACATACCCG	2D-2	62.252
4542702	TGCAGCGGTAGCGGCGCGCCATCGACTCATTCCG	2D-2	66.172
4394376	TGCAGGTCCGCATGTTCGCCG	2D-2	70.821
3534099	TGCAGGCAAAGCGCCAGTTGCTGTCACTCGACGGCCG	2D-2	81.155
4010194	TGCAGTCGTTTCATCCGACCCACCCAGGCAGACATGGCCAACATTCAGAGCAGTTGTTGAAGAAGAATT	3A	0
5346025	TGCAGCGGCACCATCCCTGCCCG	3A	4.559
5347015	TGCAGTTCGTGCGAGGGCCCG	3A	5.771
7347376	TGCAGCGAAATCGGAACCGAGGGCTTGACCCCG	3A	7.602
1200162	TGCAGCAGGCGGGGCAGCCAACGGCAGGGCAGCCAACAGCGGCAAGCAGCAACAGCAACAGCGGCAACA	3A	9.101
4394770	TGCAGGTGGAGTGTCTGCAACCCGTTGTCGTCGCCG	3A	10.081
4542559	TGCAGGGCGCTGAGGGCACCG	3A	12.316
4004133	TGCAGATGCGCCGCCAGTTTTCTGTTGAGGGATCGCGTCGCTAGAGATTATCCTGGGAGCAGTTCCCCC	3A	13.157
5332753	TGCAGTGGTGGATCACTGGGCTCCCG	3A	14.306
4395809	TGCAGCTGCTAGATCATTGATCATCGATCATGCATGCACCGCGCGTGCAGCATCGATCATATCGATCTA	3A	16.027
1124524	TGCAGTCCGCGTGTGGGCGGCGCCGCGGCGTGAAGGCTGCGCTTTAGGCCG	3A	18.585
1303919	TGCAGCGGCAGTTCTGTCATCACTCATTACTCTCATCATATTGAGAAGGCGTTCAAGACAGTTTTCAAA	3A	19.712
4002793	TGCAGCAGCAGAGACACAAAGCTTCCATTTTTATGCGCCG	3A	20.384
5348505	TGCAGGAAGTGCACTTCTTTTTTGCTTGGCCG	3A	20.614
980924|F|0-27:T>G-27:T>G	TGCAGCAAATTCAGTCCAAGTAGCCTTTAAATGGCTTGCTTGCCCTGGTAAACATGCACACTGGAACGG	3A	21.43
1140665	TGCAGCTTTCTCTTCGTCTTGTGGTGTCGCGTGTTCCTTTCCGCGGACGCGACCTTGTGAACGTCCACC	3A	22.671
2256286|F|0-33:A>G-33:A>G	TGCAGGGGACTGAAAAAGATTCGAATTTGATGGACCTAGTAGGCTACTGGACAAGACATGGAGGGCCAA	3A	25.15
1764946	TGCAGGACCAGCTGCTATAGCAAGAGGAGGCCGCGGTGTCCCTCTCGTACGGCCATTCAGCGTACCGAG	3A	25.864
1128606	TGCAGGCTGAGCATGAAGAGCCACCAGAGCCGCGAGAGTCAAGGCCGCCG	3A	26.417
5993476	TGCAGGACCCGCTGCTAACGTAAGAGGAGGTCGCGGCATCCCTATCGTCCG	3A	26.697
1139783|F|0-7:C>G-7:C>G	TGCAGTTCGGCGAGGTGCGAGGCGAGGATCTCATGGTACCTGGACTCGTAAGCCCACCCG	3A	27.086
1282236|F|0-15:C>T-15:C>T	TGCAGTTGGGCGAGGCGCGAGGCGAGGATCTCATGGTACCTCGACTCGTAAGCCCGCCCG	3A	27.119
4733495	TGCAGCACAAGAGGCGCGGCGGCCGTCGGGCAGGGGCCTCCCGCCG	3A	27.709
1211713	TGCAGATGGGCCCCCAACGAACATGAGACTGACTGCGGGCCTGAGCTGAAGCAGCCCCG	3A	28.17
3946329	TGCAGATGTTCTCGAGCACCG	3A	28.79
5567598	TGCAGCTCCCCACCGCGCGGCTGCCGTCGCACCTCCCGTTGCAGGATCCATGGCCGCCG	3A	30.132
3960652	TGCAGAGGAACACCGCCTTACCGCTGCTTCTCCTTCCCG	3A	30.627
4410776	TGCAGGCAATGGTCGTCCCCCGTCCG	3A	31.261
5370962	TGCAGTGAGCAAGGCCCCACTGCTGCCG	3A	31.53
2256563|F|0-16:C>T-16:C>T	TGCAGCTGCTTCTGATCCTATGCGACACGTACCTCGACAAAGCAGTCGTGGAAGTGGAGCCG	3A	32.26
7353422	TGCAGGCCGTCGGCGGTGCCG	3A	32.674
2256563|F|0-28:G>A-28:G>A	TGCAGCTGCTTCTGATCCTATGCGACACGTACCTCGACAAAGCAGTCGTGGAAGTGGAGCCG	3A	32.969
1394764	TGCAGCAGATGTACGTGGACTACAGGAAGGGGAGCTGCCATCGACCCCCTCCCG	3A	33.469
3064686|F|0-8:C>T-8:C>T	TGCAGCCCCCGTTTCACCTGATGAGGAGAGGATGGGATCCACCG	3A	34.028
1126454	TGCAGCGATGGTGCTCGCCATCAATCCCACCTCACCGTGCTGACTGTGACAGCGACATCGCACCACCGA	3A	34.895
2261983|F|0-23:G>T-23:G>T	TGCAGCTGCCGCTCGGGTCAACGGTCGTGCGCACTCGACCGCACGCGCCCGATCTACCTCCAAGCCAGG	3A	34.988
1165439|F|0-21:G>A-21:G>A	TGCAGACGGACGGTGCGTACTGCCTGATCGCTCCCTGTCTGTCTCTGACGACGCGGCGCGCAGCCGAGA	3A	36.16
3950919	TGCAGACGGACGGTGCGTACTACCTGATCGATCCCTGTCTGTCTCTGACGACGCGGCGCGCAGCCGAGA	3A	36.274
4540895	TGCAGATAGGGGCTTGGTGATTTCGTACCTCCGCCTCCG	3A	36.827
2292269	TGCAGGGCTATAAATAGGCTGTCCCTCTCCTTGTGTCATGGCGTGTGGTTTCATTGTTGCTCGATGGTT	3A	38.097
4911104|F|0-20:T>C-20:T>C	TGCAGCGGCCCGAAGAGGCATGTGCTCGCAGGGGGAGGGGGGAGGCGCCG	3A	38.525
1383547|F|0-68:A>C-68:A>C	TGCAGCTTTTATTTGCAGCTGTAGCTCTCCGCTTTTGGCACGAGGCCGTTGCCTCCAGGGACTCGGCCA	3A	39.613
4911247|F|0-40:T>C-40:T>C	TGCAGCTAGTTGTCTTCAACCTCGAGCCAGGAACCAGGATTGTCTCCGAGAGCTGCCACTTGCCATCAC	3A	39.941
1220807|F|0-28:G>C-28:G>C	TGCAGCTGCTCCTCACCGCCGTCGTCACGGCTGTCGTCGTCAAGGTCCGCGCCATCCCGCACTTCTTCG	3A	40.543
4992478	TGCAGGCCGTGTTGGGCAGTGCCG	3A	40.735
2303269	TGCAGGTAGCATGAGCTAATAAATTTCGTCGACATGGACTCAATCGCGCGTGCCTTAAACTCCG	3A	41.151
2254520|F|0-25:A>C-25:A>C	TGCAGACCCTGTAGGTCCGTCAGGGACACTCTCTTTGTGATTCAAGTTGCCTTTCAGACGACCATCGAT	3A	42.465
2253843|F|0-23:C>A-23:C>A	TGCAGGACCAAGAGAATTTCCGCCGTTATGCATAATGGTAATTACCTTCATATAATCTGCCTCGACATG	3A	43.947
1112413|F|0-68:G>C-68:G>C	TGCAGCAAAAGCGTTATCTTGAGCCGAGTGCTCTTCACTCTGTTTTTCGTTGCAATATTCAGTCTCCAG	3A	44.597
2362706	TGCAGCCACCAAGGCAGGGGCAGCGGCTGCGGAGCTAGAGCTAGAGACGATCGATGGCCGTGTCACGCT	3A	45.338
5345478	TGCAGATGGCCGAATCCGACACGGCGGCCG	3A	45.718
3940010	TGCAGCATGCGGCGGTGGCTGATGTTTGTGGGCGGAATCAGACCG	3A	46.518
3024755|F|0-41:C>G-41:C>G	TGCAGACTTTGTTAAGTTCGGTAGACAGCACACACGACGGTCTACCG	3A	47.088
1203001|F|0-61:A>G-61:A>G	TGCAGCTGTGGCGGGAATCTTGACAGCACAACACGCCTTTTTCTCCACCCCTCGTTCAAAAAGTCTGTC	3A	47.462
4538659	TGCAGACCGTGGCGCCGCGCGTCGAGCGCCACCG	3A	48.439
3033421|F|0-21:A>G-21:A>G	TGCAGCACGGGGAGCAGGAACAGCTTGGACTCGTCCGCGAACTCGCCG	3A	49.933
1090686|F|0-37:A>C-37:A>C	TGCAGACCGATCTTCTTCTACTTGGCTGGCCGAGAGGACCGCACGTCACGTACAGCGTACCG	3A	51.122
2257745|F|0-26:A>C-26:A>C	TGCAGCGCACGCCATTTTTTCGAAATATCCCAGTACGGCCACGGTTATCTTGGTAGATTAGCGATCGAC	3A	51.618
1127468|F|0-22:T>C-22:T>C	TGCAGCTTCTCCTCACCGCCGCTGTCGCGGTCGTCTTCGTCAGGGTCCGCGCCATACCCCACTTCTTCG	3A	52.361
1237567|F|0-5:A>G-5:A>G	TGCAGACGCCTAGGAGAGCAAGAAGGGTGGAGACAAAGGGCTCACGATGATGCAGTCGTAGTCAGCATC	3A	53.037
1220807|F|0-26:G>A-26:G>A	TGCAGCTGCTCCTCACCGCCGTCGTCGCGGCTGTCGTCGTCAAGGTCCGCGCCATCCCGCACTTCTTCG	3A	53.184
2253741	TGCAGACCATCGATATACGCCACCACATACCCATCACCCTCGACCTTCATGTAGGCAACTACACCCGAG	3A	53.717
2260732|F|0-10:A>T-10:A>T	TGCAGATTCAAGCCAAACGCCCGTTGACCTGGCCACGATGATCGTTGAGTCAATTGGCCGTGAGATCGA	3A	54.199
1241567|F|0-16:T>C-16:T>C	TGCAGGACGTGTTCCTTAGGCTCACGTTTGACACCACCACCACGCTGGTCTTCGGCCTCGACCCCGAGA	3A	54.741
5370467|F|0-56:T>C-56:T>C	TGCAGCAACACGAAGAAAATCACCATCTTGTGGCATCGAAGTCTGATTTTGATCAGTAAAACGTGTGCA	3A	56.033
1101172	TGCAGATGAGTCACATGGCGACGCTTGAGAAGGTGATGTCTGGCAGGGATCAACACACTCTTTGCCACC	3A	56.1
4536713	TGCAGTGTTCCGCATCCTCGTGGCGCACCCG	3A	56.827
2281504	TGCAGCGGCAGCGTCGAGGAGATTGCAAAGAGGTGGCCACGGCGACGGCATGCTCGCCTAGCAACCCCG	3A	62.622
5577022|F|0-67:G>C-67:G>C	TGCAGCGGCAGCGTCGAGGAGATTGCAAAGAGGTGGCCACGGCGACGGCATGCTCGCCTAGCAACCCGA	3A	63.575
4003719	TGCAGCAGCAGCTTTGAGAGGCGTGGCGACCAGGGAGGGAGGCGCGAGCGGGAGGAGGAATCGAGGGCC	3A	64.99
7347718	TGCAGCGGCTGTGCGCTCGTCAGACAGACAGTCGGCGCTGGCAAGGGAGTTTGGGCCG	3A	66.248
1237567	TGCAGACGCCTAGGAGAGCAAGAAGGGTGGAGACAAAGGGCTCACGATGATGCAGTCGTAGTCAGCATC	3A	66.969
1107292	TGCAGTGTCCCGCATCCAGGCCCCTTCCGCTGCATCCACCTCTACTGGAGCACAATGGAGGAGCACCGA	3A	68.843
3023146|F|0-18:T>C-18:T>C	TGCAGACGGCCTACGCCATTCTGAGTTACCAAAAGTAGATGATCCG	3A	69.024
2257732|F|0-59:T>C-59:T>C	TGCAGCTCCCTGGCGCAAGGGATGAGCCACTCCGACTCCTCCTTGGCCTCGAGAAGCTTTAATGGCGTG	3A	69.09
1004999	TGCAGCAGCCCCCTGGATATGGCCAGGGAGGGTAGTACGCCTTGACGTACGGGACGGTCATCGCCGAGA	3A	69.316
2269763|F|0-6:T>G-6:T>G	TGCAGCTGTCGGCAGTGTGGTTCAGGAAGGCCAAGCTGGACGCGAGGGAGAGGCACGGCGGCGACCTCG	3A	70.146
3937907	TGCAGCTCCTTCCCGCGGCCGAAGAGGCCCGACGCGTCGCCG	3A	70.962
4543349	TGCAGTCTTCGACGTTAGCTACAACCG	3A	72.094
1120213	TGCAGCAGAGGGCAGTCAAGGGGCGAGCAGGATGGGTCCAGCCGATTTCTTTGCCG	3A	72.915
1032385|F|0-23:T>C-23:T>C	TGCAGACTGTTCTGCACACGCACTAGTTAATATTTTGTCTTCTTTAGACCGTTCTGTATTGGTTGTTCA	3A	73.488
2261562|F|0-59:C>T-59:C>T	TGCAGGCGGAAGGAGCCGAGCCGCGGAAGGCAGGAGGTACAGACCAGTCCTCGACCAGACGGACAGCTT	3A	74.541
4439540|F|0-27:A>G-27:A>G	TGCAGATTGGACAAGTTGGCGACCTGCACCG	3A	76.357
3955623	TGCAGGACGGGGAGAGTAGTAATCTCCGTTCCTTCTCCG	3A	80.15
2255490|F|0-23:T>C-23:T>C	TGCAGCGTCGTCACCTTCCAAGGTACCTCCTTCTCCTTCGAGTCGCCCATGACGCACCTGGAGGAGGTC	3A	80.588
3937897	TGCAGCAGCGTCGGCGGGAACGAACAAGGAAGGTCCG	3A	82.45
3031311	TGCAGGGGTAGCCCGCCGTGTGCGCGCACGCACAGTCGCCG	3A	84.388
4396198|F|0-38:G>A-38:G>A	TGCAGATTTTTTTCATCGTGTTAAAAGAATGAGATAACGTGTGAAGTTAGACATGTCGAAGACAGTTCA	3A	91.54
4538283	TGCAGAAATCTACCAAAGACGTCTTGTTTTCCG	3A	95.716
982776	TGCAGAAGTGAAGCCGACCGATCTAACTCAAACACTCTGGTTCTGCATTTCAGTACCCAGATCTCAAAC	3A	96.981
12855977	TGCAGGAGCAGCGGCTGCTGGAGGGGGCGACGCAGGCGGCGTCGGTGATGCAGCCG	3A	101.301
1072086|F|0-5:C>T-5:C>T	TGCAGCCAAAATCCCTGCAAATCCCCTCCAATTCACCTGGGGGTGGGGGATTAACCGAACAAAGCCTTA	3A	104.832
3222329	TGCAGCGAGCGAACAAACGCCCTGTAGCTAAAAAACTGAGCGCTCCG	3A	106.323
5338376	TGCAGCTCATGGATGCCCATGGCGGCGGCTCGCAAAGTTGGATGGCAGCGGCTCGGCCACATCGGCGCC	3A	110.415
4409974	TGCAGGGGAGCCATGATGGATCTTGCCG	3A	111.44
3943406	TGCAGCCGTTTCAATGCTGCCCGAAGCCAGCCG	3A	112.315
2289202|F|0-36:T>A-36:T>A	TGCAGAATACAAACACGCAATCGACCACACTTCTAGTTGGGGTCCTGGGGTCGCGGGGGCCATATCTGG	3A	114.167
3937344	TGCAGCGAGGTGCTCGGTCGGGCGACTCAGAGTCCG	3A	115.368
13376125	TGCAGGCACAGCTTCCCGACAAAGACGCACCGATGGACACGAGCCCG	3A	115.408
1082841|F|0-62:A>C-62:A>C	TGCAGCTCAGGGGCCAAGTTTCACCCTCGCGATCAGCGGTCATTGCCATGGTTCTAATTAATACCCCAC	3A	117.124
1250769|F|0-65:T>G-65:T>G	TGCAGTGATTGTTTGCTTATAGAAAGGCCGTGTGGATGTGATCGTGGTGGATGGATCGTCAACATTGCT	3A	118.41
3935740	TGCAGATGTACTCGCGTGTAAGCCAGCGACTGGGCTGCCG	3A	125.863
1095884	TGCAGATCGCCCAAGAAATTTCTCCAAGGCGTTCTTTGGGGCGGCGGCACCCCG	3A	126.454
4009434	TGCAGAAAATAGTTGGTACCCTGTATTTGACCG	3A	128.413
1064832	TGCAGTTGGTATCCTGTATTATCGTAAGAATTGCAGAAAATAGTTGGTACCCTGTATTTGACCG	3A	130.07
982324|F|0-9:A>G-9:A>G	TGCAGCCACAGGAACGCGTACCCTCTCCCTGCTCCCCCGCGCGCCCTCATGGGCCG	3A	130.558
3023794|F|0-50:T>G-50:T>G	TGCAGCGAATACGGATCGACAAATGCTCACCTCATGGAAGGGCTGCGAGATTACCCAGCAACATGAAGA	3A	135.84
3064829|F|0-15:G>T-15:G>T	TGCAGTAACTGCGGCGTGCATGCAGGCCCCGTGAGCGACCGCCCACCG	3A	135.974
4537562	TGCAGCGAATACGGATCGACAAATGCTCACCTCATGGAAGGGCTGCGAGAGGACCCAGCAACATGAAGA	3A	136.324
1270969	TGCAGGCATGGATATCTTCTCCAACTCCCAGCAAGAGAAGTGGAAGAGCACGCAACCG	3A	137.474
5332951	TGCAGCTATGCCAGAACCCTAGGGTTTGGGGCCG	3A	138.816
1042364|F|0-25:T>C-25:T>C	TGCAGTTTTGCAGATCAGTGCATCTTGTTGTTCTGTTCGCCTTGCTGCCTAGCTCTCTTTCATGCCGAG	3A	140.743
1083073|F|0-16:A>G-16:A>G	TGCAGCAATCACATAGAGCGTGTTTGGTTCCTTGTGCCGCACCTGGCTCGCACCCG	3A	143.711
1218912|F|0-35:T>A-35:T>A	TGCAGCTCGGCGCTGCTCCTGCTGCTTCGTAGAGCTTCTCCTCCCTGCTCGCCTCGGAGGCGGGGCCGA	3A	144.068
3951224	TGCAGAGTTCAGTATAACTGGAGTAGTACGGTTCTCAAGGCAGCTGGCCTCGAATTCCG	3A	144.581
3025069	TGCAGAGAAGTGGAACACTTCGCCTGTGCAGTCAGAGCAGTCCCCCG	3A	145.084
4542673	TGCAGTTAGTTGCTGTAGGGCCG	3A	145.474
3948377	TGCAGCATCCGTGAAAGCTTCCG	3A	146.1
990865|F|0-68:C>G-68:C>G	TGCAGTCTGCACACCCATTTGCTGCCCTGAACCACCCCATCCGCCTCCCCTGCTTCCTCCTCCTTCCTC	3A	146.678
3958301	TGCAGGGCACGATGGGGCGCGGCTGCGGGCGCTGCGGAGCCG	3A	148.576
2256869	TGCAGAGCGGGCAGTGGAGCACGCACATGTCGATCTTCACCGCGAGCTCCGCCCTCGGGCTGTGCTCCG	3A	149.275
5582933	TGCAGACCAGCACGATGGCATCCATGGCCG	3A	151.334
3026690	TGCAGCCTGAGTCACCGCTGTGGTGCCACACCGCCCCG	3A	152.341
4538631	TGCAGTCCATCAACTCCTCCTTTCGCCG	3A	152.896
4992075	TGCAGTAGAGAATCAAGACTTGTGTGGTAGAGTGGCTGTGGGCCTGCAATCGCAGGCGGCCG	3A	154.763
1259016|F|0-53:A>G-53:A>G	TGCAGGCCTTGACGCGGGGGCGCGCCTCGTCGGCGAGCTGCACGGTGACCTTCAAACCATCCTTGGCCA	3A	157.035
21743475	TGCAGGGAGAAAAGCAAGGTGGCCATACCATACAGTCCG	3A	157.767
3027159	TGCAGGACCTAGTCGCCATGGTCGGCCTCGAGGTTTGCCGTTCCG	3A	159.294
1223327	TGCAGGGCGCCAGAGCTAGTCAGGGGCGGCGTGGGGGATGACTGAAACCCCG	3A	159.539
982430|F|0-14:C>G-14:C>G	TGCAGCACAGCGAGCCGTGGAGATCGGGTCTCTCGTGGTGGAGCTGCATGGCCCCATGCATGCACGAGA	3A	160.34
3960679	TGCAGACGGTTGACATTCGTCAGCATGTCCTGGTCACTCTCGACCTGGCGGCCG	3A	160.78
7348298	TGCAGTACAGGTGCCGTGGTCATTTCCG	3A	160.914
3949168	TGCAGCAGAGAGCTCTGGACTGTATCTTGACGGTCACCTCGCCGCCCG	3A	161.021
3534012	TGCAGCATGGAGACCGCCACCGCCCATCCGTTGTCGGGAATCGCCG	3A	161.047
7347015	TGCAGCGCCGATGCCCTCACCCAGCTGCCG	3A	161.25
1218912	TGCAGCTCGGCGCTGCTCCTGCTGCTTCGTAGAGCTTCTCCTCCCTGCTCGCCTCGGAGGCGGGGCCGA	3A	161.618
1094796	TGCAGCAGTGCGCGGCCGCGGGAAGGAAGCAGCGGGGCTGAAGTAGCGGGCGGGGGCGGGCTGTACGCC	3A	161.704
1255179|F|0-14:A>C-14:A>C	TGCAGCTTCGCCGCACCGCCGCGGGCGCTCCTCGTCCATCTCTTCGTCCTGCACTCCATGCCG	3A	162.338
1109698|F|0-19:G>C-19:G>C	TGCAGCAGGAGAGGAACCAGGCGATTCTGTCAACCGTCGCCGCTACCAGAACCTCTTCATCATCATCCA	3A	163.272
5364424	TGCAGGATAGGTTCTGCACACCG	3A	163.619
1720545|F|0-61:G>A-61:G>A	TGCAGACAGCGACGGCTCCCTCTGGGGCAGCTCCCTCCAGAACAGCGGTGATCCACAGTCGGACGCCGA	3A	164.244
1393120	TGCAGCACCAGCGAACCAGATGGTGAGATTGATGCCGAGCGACACGCAACACCCAGACCCAAACCAACC	3A	165.636
1228442|F|0-46:C>G-46:C>G	TGCAGGCTCTTCATTTCTTTTCTCCCCGTCGGCGGAGCTCACGGCTCTGGCCTCCG	3A	165.904
1254535	TGCAGGACGGTGAGGGCGAGGAGGAGGACGGCGGCGAGGAGCGAGACGACGGCCCAGGGATTAGCGGCG	3A	166.366
3025624	TGCAGATCATACTGCGTTTCCTCCGTGCTGGGGAATAATCGTGCCG	3A	167.07
4003306	TGCAGCTCCTCATCCCTCCCATGGCCTCGTTTCGGCCG	3A	168.14
1106789	TGCAGGGCCGTCCACCGCCAAGCCCCAGCGATGCCCACCAAAATCACGCGCCAGATCCG	3A	169.65
4005656	TGCAGGGGGGTGGCGCCCATGGCAGAGGCCAGGAGCGCCG	3A	169.673
1252809|F|0-34:C>T-34:C>T	TGCAGACCATATCCTGCCCGTCCGTTATCCTAACCGATCAGATCCCTCCCG	3A	170.511
5567389	TGCAGGGTGCCGTGCCAGTACCCCG	3A	173.251
3022541	TGCAGCAGGTACCCTTTATGATGCACTCCTCAAAGACGTCTCCG	3A	179.718
5568220	TGCAGCGCCCCCACAGTAGTCCG	3A	183.163
3027153	TGCAGGCCATACGTCGCGACACATCCAATCCACGTGCCG	3B-1	0
4394383	TGCAGTTCTGCTAATAAATGGTCCG	3B-1	0.663
1696472	TGCAGCTGGAGGAGAGATGATACCTGGGAAAATCCTCGACCAAGAGATGGAAAACCG	3B-1	3.855
4262452	TGCAGCATGCAGCAGGTTACCG	3B-1	7.016
1121252	TGCAGGACTACGAGGCGGAGGTATGGTCAGCAAAGTACGAGAATGAATTGCCG	3B-1	8.685
3955846	TGCAGCGATGAGTGCAGCGGCGGTGCTCGGGAGAGCTGCCG	3B-1	9.286
1089896	TGCAGGTCTTTTGCCCGAGAGACAATGCTAGTGGTGAGAGGGGTGCAAGCGGCCACGCCG	3B-1	10.719
5410924	TGCAGGAGCTAAGGGCGAGGCCG	3B-1	12.051
4002579	TGCAGCGTGGGTGCTCAACACAACTACACGCCGCATCCG	3B-1	18.635
4003569	TGCAGGAGGCATCCCACGATCAGCGGCCCG	3B-1	19.7
3957687	TGCAGGAGGGAAACGTCAGCGGCAAGTGAAATCCG	3B-1	20.442
4542363	TGCAGTGTTCGCGTTGCTAGCGAGGCGACCG	3B-1	21.331
1233878	TGCAGGCCTGACTTCCAGCAGTCCGAAGGCTCTGTCCTCACAAGGTGGTGATGCAAAGCTGGTGACCGA	3B-1	21.986
1026476|F|0-31:C>T-31:C>T	TGCAGAAAACGGCGTTAAAATCATCGGTGACCATCTACACGGCCAGATCCCGTACGATACTCCGAGCGC	3B-1	24.466
4393872	TGCAGCGGAGCGAGACGGAGATGCTCACACCCTCCCCACCCG	3B-1	25.268
1259494	TGCAGGGTTCTACGTCGCTAAGTGTACGTATATTGAAGGTTCAGTACTATCCG	3B-1	26.49
3942741	TGCAGAGTGCAGAGTTGAGGAGGATTCCATGGATTCAGTCGCAGCCG	3B-1	27.713
4395960	TGCAGAGGTTCACCTGGAGCTTGCCGCCCG	3B-1	28.263
3032800	TGCAGGGCGCACAGTGCTAGTCTGCTTGCATGCGCCG	3B-1	31.466
3944973	TGCAGCCTGAAGAACGAGTCGGCGAGCGCATAGGTCGCTCCG	3B-1	32.035
3385048	TGCAGATGTTTAGTACTGCACGTTCCTGGACCCACAAGTCAGCCG	3B-1	36.994
4440020	TGCAGTGGTTCACAACAAAATGGATGTCCG	3B-1	40.995
1211724	TGCAGATCACACAACAAAACTATGAATCCTCATGACACATGAAGGGATAGAGACAGCTCAGGTATTTTC	3B-1	44.997
4986224	TGCAGCCATCCAGATGCTGATGCTCTCGCTCCCG	3B-1	45.703
2327198	TGCAGTGCGTAAGTTCGATGTCTCTTGGGCCCGCCCAGTCGCGAGCACACTCAGCTATCCCG	3B-1	46.312
1019166|F|0-24:A>G-24:A>G	TGCAGCGACGCGACGTACGGCGCCAGGGTAGCGTAGGGCGCGCCATACAGCGCCTCGTAGGGCACCGCG	3B-1	51.207
3026426	TGCAGACACAGACACACACACACACTGCCTGCCGCTACTGACCG	3B-1	53.817
4909526	TGCAGGTTTCACTGATGTCTCCTCCG	3B-1	54.943
1128851	TGCAGCAGGCCCATCGTCGCGTACCTGGGCGGGGGCTTCGTTCGGGACACGCCGCCG	3B-1	57.006
3937747	TGCAGCTCAGCTTGTGACGACTCGAGCCGCGCACTGTACTGTGGCTCCG	3B-1	57.976
5410443	TGCAGCAGCGAGAAGCGGCGGGCGAATGGGCGTCGCTTCAGCCG	3B-1	58.295
7329446	TGCAGCGGGATCAAGCTCAGGAACAGCTGAGGTACCG	3B-1	58.927
1229563	TGCAGCGGGATCAAGCTCAGGAACATCAGGCTGAGGTACCGACACCAGCGGCCG	3B-1	59.337
1162493	TGCAGGAGAACCACGGGACGACGATGCTGCGACCCGATGGGGCAACACACCG	3B-1	60.109
3024557	TGCAGTTGAGGCTCTCTGCCTTCCCAACTTGTACCTGCCAATTCTACCG	3B-1	61.035
4733919	TGCAGCGGTGTGACGGTCCAAGGCGTCTGGATCATCGCGCCGTCTAACAGCCCCAACACCG	3B-1	61.542
7334622	TGCAGCTTGTCTTCAACGAGGACACGGCCGTGCCG	3B-1	61.653
3533221	TGCAGGGAGCGCCGCAACAACCGTGTGCTTGATTGCCG	3B-1	62.96
3945055	TGCAGCCTCCAGTTTTACAGGAAATAAAACATCCG	3B-1	63.112
3937649	TGCAGCGGAGAGCTTTGGACTGTATCTTGACGGTCACCTCGCCGCCCG	3B-1	64.062
21743581|F|0-28:G>T-28:G>T	TGCAGCATCAGATTGTTTCGTCCACAACGCAACACTCCG	3B-1	64.795
5969528	TGCAGAAGAGAAGATGTGGAGGGAGGATAGGATGAGGTAGGCGTGCTGGGGCGGGGTGGTCTCGTCGGC	3B-1	65.318
1123330|F|0-49:G>A-49:G>A	TGCAGCTGATCCGATCGCTAGGCTTTGTCGTTGAAACCTCCTATATGCCGCTCGTTGCGGCAAAAGGTC	3B-1	66.213
3021187	TGCAGCTTCTGAGTACTGAAATTAAGTTTCTGAATAATATGCCG	3B-1	67.735
3949271	TGCAGCCCACAAATGAAGCCCG	3B-1	68.586
4993183	TGCAGCCAAGGCAGGGGCGGCGGGCCG	3B-1	69.571
7331344|F|0-10:C>G-10:C>G	TGCAGGAGAACCCTCTGGCCG	3B-1	69.946
1079687	TGCAGAGAAGACTGTTTGGCCTGGTTCCCCACAGCAATGCAAGGATCAGACACCTCTGGGTCAATCGCA	3B-1	70.514
1234895	TGCAGGTTGGTTGCCGTCCTGTCTTCGTTTGCCAGCGAGTGAGCTCCTGAGTCTCCG	3B-1	71.129
4910077|F|0-9:G>C-9:G>C	TGCAGCCTCGACGGGTACCACGTCCCG	3B-1	72.986
7342852	TGCAGCAGGGAGCAACGGGGCCG	3B-1	75.054
5582037	TGCAGGCAGTGCCACTCCCCCACCTCCG	3B-1	76.39
3030524|F|0-23:G>A-23:G>A	TGCAGCGGCGAGCGATGGCTCTGGCCCGTCGGTTCCG	3B-1	77.79
5323669	TGCAGTCAGCCGCGGCCGCTGGGGTGGCGGCCGTCCAAGCACCCG	3B-1	78.28
1725635	TGCAGGGCGATGGTGAACGTGTATCAGCACTATGGCAACCGCGAGACAGCTCTCGTGGATATACTGCGC	3B-1	78.504
3945360	TGCAGCCACAGGATTGACTCTGGACCGCGTGACCG	3B-1	78.642
3934695	TGCAGCTGTTGGCAGCGGCCGTCCATGTTGAACACCG	3B-1	80.012
985734	TGCAGAACGCATGCAGCAGGCCAATAATCCACCGCCGTACGCTACGCTCCG	3B-1	80.404
1108567	TGCAGCAATCCGAGAGCAGGAAGAAGATGCAGCCACGGTGTGGTATGCTGACTCCG	3B-1	80.486
4539521	TGCAGGACCTTGTCCGTTCCACCG	3B-1	81.158
1122727	TGCAGACGCCTCGCCCGATGGCTGCTTACCTCCAGCGGCAAGCATGCCCCCG	3B-1	82.635
4540730	TGCAGCCACGTCTGGATTCCG	3B-1	83.856
7491419	TGCAGGGGGGCGGCCGCGGGGATCCG	3B-1	84.058
3384676	TGCAGTATTAAGAAAATGTTGTGACCCCAAATAGAGGAAACAAGGTCCG	3B-1	84.629
1125082|F|0-20:C>A-20:C>A	TGCAGCAGTGCACATAGCCACTTTGCTGTGTACCTTAACCAAAACCGCCATGACGCCTGCACGGCTGCA	3B-1	84.852
3025080|F|0-5:C>G-5:C>G	TGCAGCGATCGGAGCCTAAACTATTCTCCCGCCGTCCG	3B-1	85.681
1086457	TGCAGGTTATACATGATGCAGATTTCTTCAGGAAGTGCTTTGATATGACAATTGCCG	3B-1	88.241
5411801	TGCAGTCGAACGCGACAGCTCCG	3B-1	88.742
1127889	TGCAGCCTGCACACTGCCACTGTAGGTAGGGCGGGACTGCTGGTTGCTGCCGCCG	3B-1	89.378
1111661	TGCAGAGTGCCTGCTTTGCCGCAAACCAACAGCACAATGTTGATTGAGATATCTCCG	3B-1	89.77
4909733|F|0-17:A>G-17:A>G	TGCAGGTGGGCCTCGATACGGCACGGCGTGGCCG	3B-1	92.103
3948188	TGCAGCAACGATGATGGAGGCGGCGGTTTAAGCATGGCACCG	3B-1	94.74
4411471	TGCAGTGAATACGTTGTTGTGCCGAGGAACCG	3B-1	97.549
4405814	TGCAGAGAGGTAGTGCAGCCAGTCCG	3B-1	98.413
4543510	TGCAGTTCGACTTGGAAGCGAGAACCG	3B-1	100.47
1213292|F|0-23:G>A-23:G>A	TGCAGCCAACCGTGAAAGCATGCGCCACAGCAGCTCGGCAATACAACCAGCTTGCATCTGCTCGCCCAA	3B-1	100.544
3064753|F|0-23:T>C-23:T>C	TGCAGCGTTCAAGGCGTCGATCTTGGAACGCGCGAGCCG	3B-1	100.583
7331030	TGCAGATCCGCATGGCCGCCG	3B-1	101.882
3953802	TGCAGCCAAGACAGGGGCGGCGGGTAGGGAGGGGAGCTCGAGCTAGAGACGGTCGATGGCCGTGTCACG	3B-1	102.372
1235235	TGCAGCTTTCCTCCCCTTTATCCATCTCCCCCGCCACTCAGCTCCTCCACCG	3B-1	102.935
1124581	TGCAGAACAGCGGCGCGGCATGATCTGGAGTAGACACCTACAGAAGGCGGCCG	3B-1	103.513
5971720	TGCAGCCGCGAGGTGAGCCCCCG	3B-1	105.067
4410526|F|0-22:T>C-22:T>C	TGCAGCGCCGAGTATGCCCACATGTACCGCCG	3B-1	105.591
5567557	TGCAGCCGAGTCGATCGACTTGTTCAATGCCG	3B-1	106.353
4733639	TGCAGACGTGGAAGGCCCTCCCG	3B-1	107.703
1209306	TGCAGTTTTTCAGCTTCCAACACGTTTCTCGCCTCGCTTTTGGAATTATGCACCG	3B-1	109.355
3022843	TGCAGTGATCCCTTTCGAATTTCAAACTGCAAGAGAGGGAAGAACCG	3B-1	110.268
1123034	TGCAGGATGGCGCCCAACTTCAGGCCGCGCACTCTTTCAACCTACTCCGCCGTCCAGCAGCGCATCATC	3B-1	111.069
4002839	TGCAGGGATGCATATGTTGGTGGCTTGGTGCACCG	3B-1	111.56
4993440	TGCAGCACGGGGAGCAGGAACGGCTTGGACTCGTCGGCAAACTCGCCG	3B-1	113.722
4538243	TGCAGAGGTGAGCGCGGCCG	3B-1	113.987
4009035	TGCAGTCAGGCGCCCCTACCGCTAACCTTGTCGCCTCGTCTCCACCG	3B-1	115.645
2307278	TGCAGCGGCACGAGCCGCGCTCGAGCCAGATCCATGGACCGCGCGCAACCAGAAACTAGCCG	3B-1	116.238
2263560	TGCAGGTCAACCTAGCCTCGCACCCCGTTGCAGGTAAATCGAGCCTCCGCGGACCCATTCCCCGCGCCC	3B-1	117.241
2243669	TGCAGATCGATGCTTCGAGAATCGAGATGAAGATTAGCTGGAAGAAAGATGAACGTACCGCCG	3B-1	118.029
3958730	TGCAGAGGCAGGGTGCAGGCCCG	3B-1	120.453
4990586	TGCAGATGCGGTTGAGATTGTCCGCCG	3B-1	123.463
1104615	TGCAGTGTCAATGTAGTTTTGGGCCATAAAACACAATCCCAAAGGTCATTACCTACAGCCG	3B-1	124.909
1255703	TGCAGCCGCTTGCCTGGAGCTGCGCCCCACGGTGAGGACTTGAGTCGCGCGCGTCTCTTGGACCGAGAT	3B-1	126.57
1721658	TGCAGGTGATGCTTCGTCGTCCTCCACTCTTGCTGAAGCCGCATCATCTCCGACTCCTACCG	3B-1	128.482
4404691	TGCAGCATTGCTTTATCCGTCACCG	3B-1	128.674
1121273	TGCAGATATATGAATATCGTCTCAAACAAAGTCTTGTCCAGCATACCTTCTTCCCG	3B-1	134.661
1089037	TGCAGGCATAGAGCGAGGATGGTGGCCTAGTGGTTACCCCTTCTACTTCCCTAATCATCGCCGCCGCAT	3B-1	137.37
3024710|F|0-19:G>A-19:G>A	TGCAGTACATCTCATAGACGCACGTGGAAACAGTGCCG	3B-1	140.691
977833	TGCAGATGTCGCCATGATGTTCGGCATACGGTCTGGCAACAGAGATGTGCTCGGTCCG	3B-1	141.319
3034414	TGCAGTCTTCGCTGTCGAATTTGCTGCATGGCACACCAAAGAACTCTTTGAAAACCTTCGGTTCGAACC	3B-1	142.349
1174597	TGCAGTGCATGCGTGCGTGAGTCAGCTGGTGCTAGTTCATGCGTGAAGTGTGCGTGCTAGCCGTCGGTG	3B-1	143.18
21743555|F|0-27:T>G-27:T>G	TGCAGGCACATCGTCATGAAACGCTTCTCCG	3B-1	144.843
9766635	TGCAGGTCGGCGTCGCTCCG	3B-1	147.42
21743581	TGCAGCATCAGATTGTTTCGTCCACAACGCAACACTCCG	3B-1	147.885
1399787	TGCAGACATTGACCGACGACGACGCGTTGTAGGCATGTGATCCAGGAGAAAAGTCGGGCCCCG	3B-1	150.356
4405736	TGCAGTGCCTCCTCCTTCCTCCAGCTCCATCGGGGCCCTGCCCCACCCCGCCTCCTTCCTCCAACATGG	3B-1	150.542
3020677	TGCAGGATAATTAATTAGCCACGTAATCTCCTCAGCTCCACCG	3B-1	151.105
1119224	TGCAGCGGTTTGTTTGTTTCTGAAGGGAAATGCATCCTGCATCACTACTGCCCG	3B-1	151.541
7487435|F|0-5:G>C-5:G>C	TGCAGGCATAGTTGTCGACCCG	3B-1	152.106
2276928	TGCAGCTCGAAGGCGCCCACCGCTCGAGCCCTTCACCCCTGACCAAATGGGACCG	3B-1	152.735
3943645	TGCAGCTCCACGATCTCAGGCTCCTCCGTTTTGGCAGCCTCCTGGTCGCCCTCCG	3B-1	157.363
2252214	TGCAGTATGCAGTTTATGGATTTCAAAATGCGTCGACGCGCCACTGACCAATGCGGTAGCACACCGAGA	3B-1	158.73
5971484|F|0-10:C>T-10:C>T	TGCAGCGGCTCGTCACATCGCTTCTGTCCGAGGACAACTTCCG	3B-1	159.446
7348287	TGCAGGGGGAGGCCGCTGACGAGGCCCG	3B-1	159.498
4541905	TGCAGAGCTCTGTTCCCTCGCCCG	3B-1	159.873
7337405|F|0-13:A>G-13:A>G	TGCAGGGGGCAGCAGTGGAAGGCCG	3B-1	164.224
4404237	TGCAGCCCCCGAAGATCTCTACCCG	3B-1	164.303
1663815	TGCAGGGATGGTGCAGGCTGGGCGGGGTGGCGCTGCTCCGTTAGGGATGCAACCTCCG	3B-1	165.421
4993695|F|0-12:A>G-12:A>G	TGCAGCGGCGGCATTCGGGCCG	3B-1	169.365
3953078	TGCAGGTCACCGCCCTTCGCGCCCTTAGCTGCGGGAGCCG	3B-1	170.634
1131217	TGCAGGGACAGATCCATGGGGTCGCCCTTTGCGTGCAGGTTCCTAGCGCCGCCG	3B-1	172.802
2252259|F|0-6:G>T-6:G>T	TGCAGTGCTGCGTGCCTAACCTACCACGATCGATTCAAGTGGCCCAGGCCAAACGGCCG	3B-1	173.997
3024565|F|0-21:A>C-21:A>C	TGCAGGCTACTACAGCCATGAATTTGCTTCTGTGAACCGCCG	3B-1	176.321
3533183	TGCAGCTCCTGCGAGGCATCGCAAAAGTAGGCACGATCAAGCGCCG	3B-1	176.993
4394504	TGCAGGCACCAACAAGCATCACCCG	3B-1	178.423
6046861	TGCAGGGTCTTGCGGTGCGGTGTAAGGGCTGCGGTTGCCG	3B-1	180.858
4021017	TGCAGTACGTCAGGGGAGCCGAGTCCCTAGATGGAGGGGCCG	3B-1	182.562
5411035	TGCAGAGGCAACATAGAGGAACCG	3B-1	185.042
3949371	TGCAGCGCCCTGCGTGGCGAGCCG	3B-1	187.124
4405079	TGCAGCTCCGCCTTGCGCCG	3B-1	188.505
3937617	TGCAGGAACACAAGCAAGCCG	3B-1	189.665
4009046	TGCAGATCAGCCCGCAAACGACTCCG	3B-1	190.538
4262199	TGCAGGTTTGAATTCTGAACGCCG	3B-1	190.884
1282093	TGCAGACGGACCCTAGGAGCGCCCACCTGAGCTGGCAGCAAACGAGCCGAAGCCG	3B-1	191.669
1211260	TGCAGAATAAACCAGCCCATGAATGTTTGCTAATCCAGTCTGTGACTGTGAGCACAACCG	3B-1	192.36
993874	TGCAGACCACACTATAGATGTTAGGGAACACCTCGGCACACCAGTGCTCCCTATCCTGAATTCTTGATC	3B-1	193.466
1232204	TGCAGATGTGGCGGTGTTGCTGCTCAATGGAGCTTGGGCACGCTGATGCCG	3B-1	193.863
4541067	TGCAGAGCATTCACGCTGAAAGAATGCCCG	3B-1	194.062
3533976	TGCAGATAATCAACACAGAAAGTGCCAACGACCGCCG	3B-1	194.551
1013024	TGCAGAATCTTCCGCCGCCTCCGCCGCTAACGTCTTGCTTCTCTGGCCCCG	3B-1	195.049
12010342|F|0-11:G>A-11:G>A	TGCAGCAGTCCGAACTGGGCCG	3B-1	195.101
1117450	TGCAGTACCAACGTCAAGCCGCCACTGTCTCGTGACCCCTGGACTTCACCAAGTCGCCAGGCCGACCGA	3B-1	195.366
3941133	TGCAGCTTCGGCTCGTGCACAACTTCCTTCAATCAACAGTCCG	3B-1	196.318
4008375	TGCAGAGTTTCTTGAGTGGAAGGAAACCTTGCAGTTGAGGCAAAAGTCTGAAGACTAGAGAGCACAACT	3B-1	196.752
5411044	TGCAGCCTCATCTCAAGCCACCG	3B-1	197.866
3957947	TGCAGAACAGAGAGGAGACATGCGAGTCACTGGGGCAGACTACGCCG	3B-1	199.135
7351345|F|0-16:C>T-16:C>T	TGCAGCAGCGTGGCCTCCCCG	3B-1	200.372
4407603	TGCAGTTGTACCTTACTTTATGGACATGGACTACCG	3B-1	201.194
3945360|F|0-10:G>T-10:G>T	TGCAGCCACAGGATTGACTCTGGACCGCGTGACCG	3B-1	204.583
4989070|F|0-10:T>C-10:T>C	TGCAGTAGCCTGCGGTGTATTTCGTCCG	3B-1	206.804
1159083	TGCAGTGGTGTAGTTCGACGAGAGGAGAGAGACGGCAGGAGAAAAATGGGTGAGAAGGGTTATGGGAAT	3B-1	209.964
4909673|F|0-8:T>C-8:T>C	TGCAGCTTTAGCTTGTAAGACAGTTGGAGTCACCG	3B-1	210.474
1099520	TGCAGAACTCGCACACACATGAACCAGACTGGGTCCGACCCGAGTACTCAACCG	3B-1	211.924
5346877	TGCAGTCTCTCCGTCGTGCCG	3B-1	213.029
1257842	TGCAGGCCGACGGGACAACGCCCAGCTCGCGGTGGCTGCCATACTCCCCGCCAAGCCG	3B-1	214.644
4407876	TGCAGTGGCGGAGCCAGCCCGTGAATGCAGCCCG	3B-1	215.195
4536181|F|0-15:A>T-15:A>T	TGCAGCTCACTGTGAACACACGTCCGTTCTCCG	3B-1	215.579
982126	TGCAGCTCGCGTCTCCCCTCTCCCCCTCCACCTTCTGCTCGTCCAGCCGTGCCG	3B-1	215.901
1254324|F|0-21:A>G-21:A>G	TGCAGCCTCAAAGGATCCTGCATCATGCAAGGCCTGCCCTACTATAACGCATCCAAGTCGGACAGCTTC	3B-1	216.001
3940694	TGCAGCAGGTGCGCTGACGAGCACAACACGTACCG	3B-1	216.321
1234768	TGCAGTAGGCCCATCGTCGCGTACCTGGGCGGGAGCTTCGTTCGGGACACGCCCCCG	3B-1	218.153
1129802	TGCAGTACTCTTGCCATCTGATAAATGCCCATAGCACACGGTGGCCAGCGATAGCAGCAGCCG	3B-1	218.693
4407524	TGCAGGCCTCGAGGTGTCCTTCGCGCTGAATCTGTTCCCG	3B-1	219.175
1088654	TGCAGTGAGTGCAGTGGTAACTGTGAACTGACGGTGCTTGTCTCATTCCCATGACGTTATCACAGCCTG	3B-1	219.375
978632	TGCAGGGTGTCCATGATGTCAGACTTGTCAGTATTGTGGTATGAGGCCGCCTCCAGGGCGGACTACCGA	3B-1	220.275
1209948	TGCAGGCGTCCGCTAAGGAGCTGGCGCTTGCACTGTCGCTGCCATGGGCCG	3B-1	220.916
1249889	TGCAGAGCTTAGGACCAGGGAGAGAGAGAGAAAGAGAGACAGTTAGGGGCCG	3B-1	221.501
1064712	TGCAGACGACGACGATGAGGTGCATGAACACGGGCAACGCGTTTTTCCGTGCAGGAGTGCGCTATGACG	3B-1	222.028
1223908	TGCAGAAGCTCAGCTGGGGGTTCGGCCTCAATCCGCTGAACACATCCTGAGTCCCCG	3B-1	223.013
2276398	TGCAGTTTGGATCGTTGAAATCGATCTCAGACGAACTTGATCAGGTCGCCG	3B-1	224.191
1374007	TGCAGCAGCTGCACCATGTTAGCCGACACGGACAGCACCTTTTGGGTCACTGGCATCTTCTCAGCCGAG	3B-1	225.344
7488738	TGCAGACGAGCCGCGTCCACGATGACGGTGCCG	3B-1	226.458
4009955	TGCAGCGGACCGAGATAGAAGAAGAAAGGGAGAAGAAGACACAGGTGGACAATGGACTTTGCCG	3B-1	228.152
1127838	TGCAGGCATGGATATCTTCTCCGACTCCCAGCGAGAGGAGTGGAAGAGCACGGACCCG	3B-1	237.719
4409086	TGCAGTCGGCAGCCCTCCTCGTCGCCG	3B-1	240.106
16933476	TGCAGACACAGACACACACACACTGCCTGCCGCTACTGACCG	3B-1	241.289
3953479	TGCAGTGGTGTAATTCGACGAGAGGAGAGAGACGGCAAGAGAAAAATGGGTGAGAAAGGTTATGGGAAT	3B-1	244.962
4538269	TGCAGCCGTTCCCCGAGGTCGCGGCTCCG	3B-1	248.196
3023957	TGCAGGCGCATGTCCACTAGTGAGAATCTTTTCTCAAGGAAACCG	3B-1	261.096
1249224	TGCAGTTGCTGCTCATGGCCCTGCCTCGTCGTCGCCATCGTCACCCAAGAGCTACCCG	3B-1	262.157
2256230	TGCAGATCTCGTATCCTCTCGATCGACCTGTAACATCCACCGTGTAGGTGCGAATTGCTCCG	3B-1	262.761
7352803|F|0-16:C>G-16:C>G	TGCAGGTGTGCCTTGCCCCG	3B-1	263
3954980	TGCAGCGGAGCGAGACGGAGATGCTCCCAACCTCCCCGCCCG	3B-1	263.914
4393872|F|0-26:A>C-26:A>C	TGCAGCGGAGCGAGACGGAGATGCTCACACCCTCCCCACCCG	3B-1	263.988
3534250	TGCAGGCCCTGAAATCTTCGGGTGATATATATCTGCTACCG	3B-1	268.64
1862738|F|0-13:A>G-13:A>G	TGCAGCTCCGTTGACCTCGTCTGCATCGCCTACAACCTTCGGTTCGAGCTGAAGCCCTCCACAACCTCG	3B-1	269.801
3944255	TGCAGTTTCACCAAGCCATCACTGCCG	3B-1	278.471
1265683	TGCAGAAGCTCCCAAAAACATGCCATTGGGATCCCGACAAATAGCCGCAGCAGCTCCTGGGTCCCCGAG	3B-1	281.386
1098890|F|0-62:G>C-62:G>C	TGCAGCCTCCTAGGACGCCGCCGCAGCCGCTGCTTCTGATGTGGCTCCCGTCCACAGCCAAGGCACCGA	3B-1	284.224
1030734	TGCAGGCTTTGCGTCAAAATGTGCGATGGGTAACAAGTCACAACAACTTCTACTGGTACTAGAAATCAT	3B-1	287.464
4544021	TGCAGTTTTCAGCGCTAGAAACTCGCCGCCG	3B-1	289.372
3023081|F|0-19:C>G-19:C>G	TGCAGCAAATGAATTATTGCTGAGGATGCTGCCATCACGCCG	3B-1	310.886
1121665	TGCAGCTGCGATGACCGAAGGAGAAGTCACCGTCTCTTTACCAAACGATGTCATCTCCG	3B-2	0
4004163	TGCAGCACCCACAGGTCTAGAGTGACGCAGTCACCGGACGTGCGGCCCAAAGCAAGGTCGCCACCAAGA	3B-2	14.591
3028616	TGCAGTAGATCAACGAGGAGGGCGCCACCACCACCGTTATCAAGCCG	3B-2	21.349
3031801	TGCAGCCAGCCGCATTGGGAGCATGACGGTACGAGAAAGGCCG	3B-2	26.111
1027775	TGCAGCTTATGGGGAACATTGGGTGGCGAAGTGTTGGCATCTGGTTGTGGAGGTGTAGGTTGCAGTAGT	3B-2	31.785
1217990|F|0-31:C>G-31:C>G	TGCAGCAGCCGCGTCTTCTTCATGAGCTCCTCCTTGAGCCTGCTGTTCTCCTGCAACTAGGGTGAGAGA	3B-2	39.824
2268039	TGCAGGTGTCGTGTGCCATTTCCAGGCACCCTGCGGAAGGTAAGTTCGAGCTTCGACAGAACGTCCCGA	3B-2	40.075
1003923	TGCAGCAACAGGTAATCACGAAGCCGTGGCAACAAATCATCAAACCCAAAACGACTGAACTCCG	3B-2	41.405
4261111	TGCAGAGGCCCATGCGGCGACTATGGAGGAAGATTCCG	3B-2	44.567
4989014	TGCAGGTGCCGTGCAGCAGGTACTCACGGGCCG	3B-2	44.71
1091601	TGCAGAGGAGCCGAACCCGTCACGCCACGTCGGCAGAGAGGCACGCGCCG	3B-2	47.814
1162057|F|0-27:G>T-27:G>T	TGCAGCTGCTCCAAATCTTCTCTCTGTGTAAAACGAGGTGGAGGTGAGCCAGTGGCTCCTTGACGCTCT	3B-2	48.395
5582450|F|0-9:G>C-9:G>C	TGCAGCCTCGACGGGTACCACGTCCCGGCGGGCACCATGCTGCTCGCCAACGCCTACGCCATCCACCGA	3B-2	49.238
4910923	TGCAGTCTGCGGACGACTCGTGCGGCGACAGCAGCGGCGCGGCGGGGTAGAGCCGCAGGGTCTCGCTGA	3B-2	51.14
3028574|F|0-30:C>A-30:C>A	TGCAGACACAACTTGGCTCCTGCCGCTCGCCAGGAACAAGACCG	3B-2	51.798
1126025	TGCAGAGGCCCATGCGGCGACTATGGAGGAAGATTCCGACGTGCCACCGAGTATTACGAAGCCG	3B-2	52.482
1219146	TGCAGAGGTAGTGGATGATGAGCTCGTCGTTCGTGGGGTGGAAGCGGAAGCCCG	3B-2	53.8
4991201	TGCAGCGGTGGTGAGCTACGGTAGCAGCGGCAGTGGCGGCTACGGGTGCGGACTCGAGCTAGAAAGCGA	3B-2	57.756
1241932	TGCAGAACGTCAGGAGAAAGAGCTTGTGCAGATGAGCATGAGGTGCGGAAAAGACAACAAGGTGCTTGT	3B-2	60.25
981033|F|0-38:G>A-38:G>A	TGCAGATCAAGCGGGTGCAGGACTTTTCAGCTATGTCGGAATTATTGCAAGACAAGATCATGAATTGTC	3B-2	61.514
1129802|F|0-41:T>C-41:T>C	TGCAGTACTCTTGCCATCTGATAAATGCCCATAGCACACGGTGGCCAGCGATAGCAGCAGCCG	3B-2	62.83
1209537	TGCAGCTGCGAAGCGCCTCTGCTGCTGCTATTCCTTCAAGCCCCCTCGGCTCCG	3B-2	64.116
1095383|F|0-48:T>C-48:T>C	TGCAGAACAATACCGTCTATTACTCGTGTATCTCCCCGCCACCCCTGATAGTCTTATACTCCGATGGCT	3B-2	64.173
4407524|F|0-14:T>C-14:T>C	TGCAGGCCTCGAGGTGTCCTTCGCGCTGAATCTGTTCCCG	3B-2	65.317
3533846	TGCAGTGACGACCCAGACACAAGGCCAAGCAGGGGTCAAACCG	3B-2	68.151
2345819	TGCAGGGCAGAGATCATCGATAACAAACAACTTCGTGCACCGTTTGACGGAGTAAGTGAGCCG	3B-2	68.615
4262318	TGCAGAGGCGTCCGCGTGTGTTCACAAGCTCCG	3B-2	69.741
5324220	TGCAGTTCTTCTCGGCGACGTCGCAGCCG	3B-2	70.293
3949256	TGCAGGTCACGGTCTCCTCGAGTTGCAGGTCGTCTAAATCAGGAGTTCTGGACTGTTTGATCTACCGAG	3B-2	70.737
7492042	TGCAGGGTGTCTAGGGCGCATCTAAGCTTAGTCGTCCCCGTCCTCATTGGTGAGGTCGACGTACTCCGA	3B-2	71.35
3934255	TGCAGCAGCAGAGAATCAAGGATCCAAATGGGAAACCACGCCCCG	3B-2	72.208
1129073|F|0-24:G>A-24:G>A	TGCAGGGTGTCTAGGGCGCATCTAGGCTTAGTCGTCCCCGTCCTCGTTGGTGAGGTCGACGTACTCCGA	3B-2	73.08
1276825|F|0-44:C>T-44:C>T	TGCAGCCGCTGCCTCGGGTGTCTAGGGATCTCCTCCTTTGCTAACGTCACTGATGTAGAAACTGCTGGT	3B-2	73.618
1086520|F|0-13:T>C-13:T>C	TGCAGGGATGCCGTGCCGACGAGGTCGTCGGGGCCGCATCATGGAGCCG	3B-2	73.94
1101161	TGCAGCATGCCCATGCCACACATCCCCGTCCCAGATGCACAACATTCCACCG	3B-2	74.462
1099470	TGCAGCACTTTGCCAACGCCTCCTCCCTTCCTCCAGCAACCCAATCCCCG	3B-2	74.607
5050383|F|0-32:T>G-32:T>G	TGCAGCACCTGCTGGACATCCCAGACGGCGAGTCCG	3B-2	75.009
3026622	TGCAGCCACGGAATCGATTAGAGAAAGCATGCGCGTAAATAAAACCG	3B-2	75.214
1169595	TGCAGAATTGGTGGAGATGCACCCACCTTGTTGGTGTAGATGGTCTAGTTGGTGAAGAGCTTTGACAGC	3B-2	75.348
4405351	TGCAGCACCTGCTGGATATCCCAGACGGCGAGGCCG	3B-2	75.893
989241|F|0-47:T>C-47:T>C	TGCAGTAACATCGGCATATATAAGTATGACTGAAAAAGTTGTGTTAATATGTACACATACCCG	3B-2	76.212
4909610|F|0-17:G>A-17:G>A	TGCAGCGCGCCGAGCGCGCGCGGTGGCTGCTGGCGGTGCAGGTGGGGGAGGGGCTTGCCGACCG	3B-2	76.426
1284349	TGCAGCTGTCCAGCGAGGGGCGGGGGCGGCACTCGTCTGGCGAGATCGCCAACTACATCGCCGTGGACG	3B-2	76.827
1217069	TGCAGCATGCACACCGTTGAAGTCTCCAAGCTTATGAACGAAATGGTCCTCCG	3B-2	77.098
1111577|F|0-22:C>T-22:C>T	TGCAGTGTAAGACTCTGATTCGCTGCCCGCCATGCCGGAAAAACCGCGATACCCAGCCAGCCGCACCGA	3B-2	77.205
1281128	TGCAGCGGCTTCGTCGTCGGCTTCCGCTTCAGCCACGCCGTCTCCGACGGCCCCG	3B-2	77.613
4989906|F|0-13:T>G-13:T>G	TGCAGCCGTCACCTCCGTCGAGCGCGTCGCCCGCCGAGAATGAAGAGAAGTGACGGATTGGGCGCGAGG	3B-2	78.006
4909608|F|0-6:T>C-6:T>C	TGCAGATCAGTCACTGACCAGTCGCTGAGGTTGATGAAATGGACTCGGTGGAGACAATGGCGGACCGCC	3B-2	78.429
1100796|F|0-37:G>A-37:G>A	TGCAGCGTGCGGCGAGATCTTTGTTTCCCCGACGGATGCATCGTCAGCAGGAAGGATACTGGAATGCAG	3B-2	78.9
5359654	TGCAGTCGGAGATGCAGCTGGCCACGGCCG	3B-2	79.707
4909482|F|0-15:A>C-15:A>C	TGCAGGCGGCGACAAAGAGCGACGACCGTCGGCCG	3B-2	80.439
1217956	TGCAGGCCCACGCTGTAACCGTAGGCGATCTCGTACGTGTGTCCCATCGGCCCGAAGAAGGGAAGCTGT	3B-2	80.918
1081374	TGCAGTTCCTTGGTTGGCCATCCATCCAGGTGCATCTTCATCTCAGTCATGCTCCG	3B-2	81.187
4406056	TGCAGGAACCCCCTCCTCGCAGACTCCCG	3B-2	81.99
1149435|F|0-38:G>A-38:G>A	TGCAGGACAACCCCGTCAACCTCAGCGTAGGCAGGCGTGACGGGTCCCGTTCCCGTAGCGCCGAATGCG	3B-2	83.174
1099290	TGCAGCCCACGCACACCCGAAGCCACCCACGCCACGACGCCCCGTACTCCCGCTGGCGCGTCCG	3B-2	83.773
1321282	TGCAGTCTCGTCATTGAGCATCATGCGGTCAGTTCTACCTAGGACAGTGCTTGGTGGCCTCAGCAGCGG	3B-2	84.295
2328658	TGCAGTGCCGCTAGCTGCACGTACAAATCGATCGACATCGACGGCTTCCCTGGATTTTTCTTTGCGAGG	3B-2	85.526
991020|F|0-28:G>T-28:G>T	TGCAGGCAGAGATATGAATGCAGGTGCAGGTGCAGTGGCCGCACTCATGAGCTCCACATCTGCGCCGCG	3B-2	86.153
1105620	TGCAGATGTGGTGCTGACAGTACTAGGCGTTGGTTGTGTTTGATCAAATGCCTAGGAGCACCAATGATT	3B-2	87.336
6037734|F|0-18:A>C-18:A>C	TGCAGCCGCGCCCTTCACAGCCTCCTCGCGCAGCCG	3B-2	88.647
4394939	TGCAGTCTCCCCTCACTGGCATTTTTAAAGCTGCCTCCATTTCAAATCACTCTCACCGCCG	3B-2	89.853
3026770	TGCAGCCCCAGCAAGAAATACTAACAAAAAGCGGCATCCG	3B-2	91.196
1115981	TGCAGTCACTACACAGTGAACGTAGGTATGGAAATCCAAGTTGACTCCCG	3B-2	93.471
1053632|F|0-59:A>G-59:A>G	TGCAGGGCTCTAGCGTCAAGCTCTCAAATTCATTGCTCTGAAAGCCATACCCCCTCAGTAGTCATCCGA	3B-2	94.523
1127690	TGCAGCGACTTCTTGAGCGCGAACCACACCGTCGGCGCCGCCGCAGGTGCCG	3B-2	95.636
5969661	TGCAGCCTCGCACCCCCGACACGCCACTTCCTGAAGGCGGACATAGATTCCCTAGCAGATTCGAACACT	3B-2	96.847
1076971|F|0-58:A>G-58:A>G	TGCAGAGGTTCTAGACAAGCTCTAGTCTTCTTAAAGAGCTACAACTCTGGAGTTGCATAATTCTGAATA	3B-2	96.907
6037732	TGCAGCCGCCTTCGGGCTCGAGGGAGGCGGCCCG	3B-2	98.094
1210325|F|0-30:T>A-30:T>A	TGCAGTGACGGTTAGCTTGCTCTTGATATTTTTTTCATGTTGGATCCAACGGCTTGGGCGGTGGTAAGA	3B-2	98.796
989270|F|0-51:G>A-51:G>A	TGCAGGTACTCCTGTAGCGTGACGGGCCAGCCACTCGGCCCGTCGGGGCACGTGGTGGCGCTCCGCCGT	3B-2	99.483
4910791|F|0-68:A>G-68:A>G	TGCAGGCGCTCTGCGTGGACCGCGCCGACTTCGAGGCAAGGTACCCGCCCCGCCGCGCGCGCGTCGCCA	3B-2	101.338
1128399	TGCAGTGAAAACGTTGCCGTTGGCCATCGGTGGAGGATTATTGTGCTGCCG	3B-2	102.072
1287408	TGCAGCTCCAGGTACCTGTCCAGGTTGAACTTCTGCCTCTGGATCAACTTCCTCTGCCG	3B-2	103.104
4991426	TGCAGATTTGGTCCAAGTAAACTTAGGTTGCCG	3B-2	104.705
1037716|F|0-51:C>T-51:C>T	TGCAGCTAAAAGCCAGAAGAAAAAAATGAGACTGCAAGCATGCGTAGAAGACCAGGTGGCCTCGGGCAA	3B-2	107.964
3947402	TGCAGATGTGTACTGGGAAACAGTTATACCG	3B-2	108.387
1133063	TGCAGCCGCCTGCTCGCCACCGCCCGCAGCCTCGCGCCCGCGACCTGGCCG	3B-2	109.123
1125012	TGCAGTTTGGAAAGCAAAAACCATGGGTCAAATCGGTGTAAGAACTGTCGCCTCCG	3B-2	111.257
5332278	TGCAGGCAGCTAGCAGAGCGGCTCGACCGACCG	3B-2	112.285
1117472	TGCAGGGGCGACGGCGTAGGGCATCGGGCAACCGACTCAGGCATCTCGGATGGCAGCAGAAGCAGTTTT	3B-2	113.74
1110295|F|0-26:G>T-26:G>T	TGCAGATGCTCTTATGTTCCGCTGTGGGTGGGGTTTTACGGATTTTGTTGTTGTACGTCCG	3B-2	116.763
3064908|F|0-13:G>C-13:G>C	TGCAGCAGCGTCGGCGCGAACGAACGAGGAAAGTCCG	3B-2	117.906
1262742|F|0-45:C>G-45:C>G	TGCAGAGGCACAGCGACACGACAGGCATGCATTTACACAGAGGAGCCGCCGATCGAGAGAGCCG	3B-2	118.079
1123045	TGCAGGACTACGATGGCTGTTCATCAGATGAGGACGAAGATCCTTGTTCGTTCCG	3B-2	118.48
1075558|F|0-8:T>C-8:T>C	TGCAGCAGTGTATGACGCGCTTTATCTCCTCAGATGTCTGCCCGATTTCCTTACTCACTAGTTTAGCTA	3B-2	118.509
1163071|F|0-7:G>A-7:G>A	TGCAGCTGGGCATGGCAGACTGCAAACAGTGGCGACCTATGTCAGGACTACCG	3B-2	118.723
3534240	TGCAGTGCCTTTGTCACTTGGCGGTGGATAATTACCG	3B-2	119.409
5411149|F|0-33:C>T-33:C>T	TGCAGGGCACGGCCGCTGCTGATGAGGAGGCCACTAAAGACGAGGGATGGTGGTGGCGGGTAGATATCA	3B-2	120.611
1030890	TGCAGCCACTGTCAGCCATGGACGCTAGCTGAGTGACGAAGGGGGGCTCGTCTGAACGACACCCGAATG	3B-2	121.327
3064598|F|0-10:C>T-10:C>T	TGCAGTCTAACGAACGGTCAAGCACCTGCTAGCACCG	3B-2	123.236
3064396|F|0-30:A>G-30:A>G	TGCAGGGAGAGGGCGTCCTCTCTAGGTGGCACAAAAAGAGCCG	3B-2	123.445
1117877|F|0-16:G>C-16:G>C	TGCAGGGCTGGGCGTGGACCCTGCGCGGGCGAGGCGCGCACAGCACCACCGCCG	3B-2	124.037
1056087|F|0-53:G>T-53:G>T	TGCAGGGTGTATCAAGAGGACGACGAGGCCATGAAGAACGAGTTCATGAAAGGGACCG	3B-2	124.386
1020681	TGCAGACTTGCGGGATGATAACTGCAACGGGGATCACGGGAAAGGGGCCG	3B-2	125.04
4329517	TGCAGCGGCGGCATCGGTTGCCGAGATGATGGACCCATCGACGTCAGTGGTGTACAGGTCGCCG	3B-2	126.181
7487686	TGCAGCCAGATATGGTGGGGTACTGCTCCATCCCCATCCTCCCCGACGACCTCATCCG	3B-2	126.269
3946557	TGCAGCCTGTGGACTCTGCCAGACTCCAGGTCGCTGCCACCCG	3B-2	127.309
1128405|F|0-17:T>C-17:T>C	TGCAGTAGGTGACATCCTGGAGCAACCCCACGTCCCCTGCAAGTAGAAGGGGATTGCTAATTTCAGGTT	3B-2	129.658
4910228|F|0-26:C>T-26:C>T	TGCAGCACCATGGACGAGCACCGAGGCGAGATGGCGCGCTGGATCGACATCCTCGTCGCCAAGGGGGTC	3B-2	130.786
4910375|F|0-14:G>A-14:G>A	TGCAGAAACGAGAGGAGCAAAGATGAGCGAGCCG	3B-2	131.569
4003478	TGCAGGCACTCGATGGAGCTGTCCTGCGCTGTCCACCTGTTTCCG	3B-2	132.135
9364818	TGCAGTTTGCAAGATTTGTTGTTCCACTTTGCGCCG	3B-2	132.635
977833|F|0-9:C>G-9:C>G	TGCAGATGTCGCCATGATGTTCGGCATACGGTCTGGCAACAGAGATGTGCTCGGTCCG	3B-2	133.431
7488569	TGCAGAAGAAGAAGAGAGCCGAGCCCCTTATCGACCGACCG	3B-2	133.526
1262020	TGCAGGCTCGTCCACTCTTCAAGGATCGCAGGAAGTTTCCTAAGATGGCTGACCCAATGCTTCAAGGCC	3B-2	134.049
7930242	TGCAGCAAGTAGGGAGGAGCGGTGGAGCATCACCG	3B-2	135.474
3022552	TGCAGCTTAGCGAACCCTGCCTCTACTTCACCATCACCG	3B-2	136.108
3934233	TGCAGCAACGCCGATGAAGAAGTATCTACCGAGCAGGAGGGAGATGTCCTTACAGATGGAGCGCCCGAG	3B-2	136.524
5970042	TGCAGAAGCGACCAGTCGGTATAAAGATCCG	3B-2	138.72
3958392	TGCAGGCCCGTTAGGCCCAATTTAATCTGAGACACCG	3B-2	139.634
1115898	TGCAGCAAGATTCATACAGAAAACGCAGTGTCCTGATGTTGGCGAGCGAGGCCG	3B-2	140.06
5578578|F|0-16:C>T-16:C>T	TGCAGGCGCCCGTTACCGTGTATTTTGCAAACAGGCGCCTGTAGCGCCCCAATCTGGGCCG	3B-2	140.278
3936267	TGCAGCACTGTCCGTGGCCTTCGGTGGTGTGACAAAGCATCACCG	3B-2	140.684
3532992	TGCAGTCCACAACCTTGCCAGCATGAACGGTGGACAACAATCGCCG	3B-2	141.44
1267525	TGCAGCCGCTTGCCTGGAGCTGCGCCCCACGGTGAGGACTTAGTCGCGCGCGTCTCTTGGACCG	3B-2	141.95
1089206|F|0-20:C>G-20:C>G	TGCAGGTGGCGCTAGTACTACCAAGGAAGCAAGCGCACTTGGTTAATTGTTAATTCCTCAAAGTCGTCC	3B-2	142.5
4261160	TGCAGTTCCTAGACTTATTTTAGCAGTTTTTGATCATTACCG	3B-2	144.581
7165676	TGCAGGAGCGCCTGCGCGGTTGGCAGGCCGACGCGGACGCCG	3B-2	144.737
4990171	TGCAGCCGTGAGTTTCCTTCTGAGGGCGAGTCGTCACAATCCCTGTCCCAGGCCCCCG	3B-2	146.611
1025527	TGCAGCTCCGGCTACGGTTGCACCACCGGCTGATGCTCTCGTGACCACGTCTCCGTGCCCACCCAAACA	3B-2	147.008
4544317|F|0-16:C>G-16:C>G	TGCAGACTTGCGGGATCATAACTGCAACGGGGATCGCGGGAAAGGGGCCG	3B-2	148.635
4993440|F|0-11:G>A-11:G>A	TGCAGCACGGGGAGCAGGAACGGCTTGGACTCGTCGGCAAACTCGCCG	3B-2	149.194
15321678|F|0-24:T>G-24:T>G	TGCAGCGCCGCGTTGGCCGCGAGGTCGCGGCGTGGCGGGCGCGTGTGGTGAGAGACGGCCG	3B-2	150.378
5412092	TGCAGCACGGGGAGCAGGAACGGCTTGGACTCGTCGGCGAACTCACCG	3B-2	151.121
1027902	TGCAGATGGGGAAGGTTCCCCCAACCGACTTTGACGCACTCATCTGCGGTAGTGGCAGTGAGGTGTACT	3B-2	151.305
2359207	TGCAGGAGCTGGAGCGTCTCGGACAGCGGCATCGCCGTCGACAGCGCGAACCCAGAGATCTTGGACAAT	3B-2	151.538
4540078	TGCAGCTGCAAATCAAGGGAGATGACCACCG	3B-2	151.66
4910424|F|0-18:A>G-18:A>G	TGCAGACGATTGACATCCATCATCACGTTCCG	3B-2	153.214
1218445	TGCAGCTCGTGAAGAATCACAGCCATCGCTACCCCAGCAAATCACAGCTTGGTACCCG	3B-2	153.83
2256158|F|0-27:A>G-27:A>G	TGCAGGTCCCACTGTCATTCACTTAGGAGATAATTAAGAGCATGTTTAACCCCTAATTAGCCTGGCCAC	3B-2	154.35
2275611|F|0-25:A>G-25:A>G	TGCAGCGCTAGTCCTAGCTGGAAACATAGAGAGGGAGGAGCGCTGACCAGAGAAGACAGCTTCCGCGGA	3B-2	154.983
4002358|F|0-22:C>T-22:C>T	TGCAGCGCCGAGTATGCCCACACGTACCGCCGGGAGGAGGCCATCCCG	3B-2	158.762
1397228|F|0-29:C>T-29:C>T	TGCAGTGTGTCGAGGTGAGATCAAAGCTCCGGGAAGCAGCGGCGTGGCACTGGCAAGTCCCAACGACCG	3B-2	161.045
1092438|F|0-23:A>G-23:A>G	TGCAGTGTCAGGTGAAAATAGGAAATCTAAGAGGAACGAGTTTGGCATCGCGGTGACATCCAAACAACT	3B-2	161.709
1076658|F|0-23:G>A-23:G>A	TGCAGCGATAAACAACAGGAGACGTCTAGTTTACTTCGCTTTGTTCCCTGTTAGCCG	3B-2	162.941
1231107|F|0-45:G>T-45:G>T	TGCAGTGTCCTAGCGGCCACACGCCAACGGCGACGGCGGCATCGGGTTGCGGCCG	3B-2	163.985
1059080|F|0-8:A>G-8:A>G	TGCAGGTCACCCTGTAACAGTACAGCAAAAGCAGCTCAACATGCAGCAGCAGCATTTCATCCG	3B-2	164.616
3944879|F|0-22:A>G-22:A>G	TGCAGTCGTATCGTAGCTCAGCAGCAGCATCCG	3B-2	164.616
21743491	TGCAGTGCTACGGCTTGCGCACAGCTAGGCGGCATGTGGAACGGGTGTTCCCCG	3B-2	165.233
3942178	TGCAGTACTGGGAGGGCATATTACTGTAGCAGCCG	3B-2	165.884
4909921|F|0-32:A>T-32:A>T	TGCAGGGCACGGCCGCAGCGCAGCCGTGCGCCACGGTACAGATTGGCTGGCTCGTGCGTGCGTGCAAAC	3B-2	167.831
996138|F|0-37:C>T-37:C>T	TGCAGAAGCGACCAAACGGCGCCGCTTTTTCATCAACCAGTACTGCCTACGACGTAGTACTACCTCTCG	3B-2	168.898
1204598	TGCAGACTCTAGATGAATTTGGCGCTTTGTAGGAGTACTAGTAGATGTCCGTTGGCTTTTCAGATTCAT	3B-2	170.456
4396390	TGCAGCGCACAGCTCGAGCGTAGCACTGGCAGCAACACGCCATGATGGCTGCTGCAACCG	3B-2	170.843
4910465|F|0-35:G>C-35:G>C	TGCAGCTCTGCAACTGCAAGCCATGAATTGCCGCGGGGAATCTTGCGTGCTCATCCATGGCTAATCCCA	3B-2	172.599
4407815|F|0-16:G>T-16:G>T	TGCAGGTTGCGGGTTCGAATCGCTCGCCG	3B-2	174.099
21743481	TGCAGATCCTGTAGCCGCCCCTCATCAGCCCGTAGCTTACATGCACCG	3B-2	175.815
1190024|F|0-67:T>C-67:T>C	TGCAGACGTACCCCGCCGCCAGGAGGCCAGGAGGCCGCCATGGAGGCCCGTCCCGAGCTCGCCTCGCTG	3B-2	175.888
1127175|F|0-10:A>G-10:A>G	TGCAGGAGAGAATCAGGGAGAGGATGAACGTGAGGGAAGGCACCTCCTACATGAGGAGCGCCGTGCGGC	3B-2	177.957
1115362|F|0-23:A>G-23:A>G	TGCAGCAGAGGATCAGGGAGAGGATGAACGTGAGGGAAGGGACCTCCTACATGAGGAGCGCCGTGCGGC	3B-2	177.979
2268087	TGCAGGTCAATAAAGTCGGCAACTCGACGATGCCGACCGCGCTGCTCCTTGCCGCTCCCCG	3B-2	178.838
992754|F|0-41:C>T-41:C>T	TGCAGGTAAGCGCCGACGCACCTTGGTGATCGCCGTCGCCGCGGCTATTTCCG	3B-2	180.929
1096997|F|0-10:T>C-10:T>C	TGCAGATAGATGCGGCGCCCCCCCGTTTACCTGCTTATTTATTGCTGCGGTGGCCG	3B-2	181.754
1133181	TGCAGAGGCGTGGACAACTACGGGCATTTTCTTGGCAAGAGAAACATGGCTAACTGAGGCGCCG	3B-2	182.595
1219231	TGCAGCTTGTGTTCTTTTTTGCTTTCCTGAGGGGATGCAGCTTGTGTGCTGGCCG	3B-2	182.827
3945348	TGCAGCGGGATCAAGCTCAGGAACATCAGGATGAGGTACCG	3B-2	187.017
7930283	TGCAGGCCCATAGGGCAGAAAACCCTATCCGCCG	3B-2	187.045
3946694	TGCAGGCTGACCCTGGAGTCGCCGCTGGTGTGCAGCAGCTCCCTGTCCG	3B-2	187.185
1094391	TGCAGAAATCCTGTCGGTCTCGGGTACTCGGCTTCTTGCTAGGGCGATATAGCAGAAATCAATCCGAGA	3B-2	188.826
3937186	TGCAGGCACACACAACAACACAGCTCATGATATAGTCGATCGATCACGTGTAGTTGCATGCATGTACGG	3B-2	189.841
1055305|F|0-51:C>T-51:C>T	TGCAGTTTGGTGCGATGACCTAATAATCCTAGCTTAGGTACAAGCACTTCACTCCCTCCCTTGCGCCCT	3B-2	192.365
4004398	TGCAGCTGGTCGCCCAGGGGTGACTGGATCGTCTTCTCCTCCTCCCGCGATAGGGACATCCTCGACTCC	3B-2	192.42
3955978	TGCAGCATAGCCATGCATCGATCTCGCCTTCATCGTCGAGTCGCCG	3B-2	194.476
3222238	TGCAGGGTTGTGATGCGTCAGTGCTCCTGTCTGTCAACCCCG	3B-2	194.477
5331812	TGCAGCCAAAAAAGCTGGAAGCACTGTCCG	3B-2	195.613
1127848|F|0-8:T>C-8:T>C	TGCAGATCTGCCGATCATTGCGCTTGTCGCCATCAGATCTACTCATTCCACCTCGCCATTGGCCGCCGA	3B-2	196.075
2263392	TGCAGACGGCACGGAAATGGAGGAAGTCGATGGCGTGGCGAAGGCGGCCGGAGATGTCACGCAGCACGT	3B-2	196.134
3942021	TGCAGCTTGGGAATGAAAGACAGAAAGATAGCAACCG	3B-2	197.909
4538952	TGCAGCAACGATGATAGAGGCGGCGGTTTAAGCACGGCACCG	3B-2	198.492
1119853	TGCAGGGGGCGCAACGCATCAGGCCGAAGGAGGCAGAGCGCGTTAGCCGAGGAGATGGCGCCG	3B-2	198.771
5411360	TGCAGAGTGTAGACTGTGGTGCACGAATGTCGTCGACGTCGATGTCGGCGCCATCGACGGTCCCGACCT	3B-2	200.614
1083008|F|0-11:G>A-11:G>A	TGCAGGAAAAAGAAGAAGCTAAACCCAAGGGACTAGATTTGGAACACACCATCTTACACACCTCTCCCG	3B-2	201.561
2260135|F|0-36:T>C-36:T>C	TGCAGAGTGTAGACTGTGGTGCACGAATGTCGTCGATGTCGATGTCAGCGCCGTCGACGGTCCCGACCT	3B-2	201.576
1863525|F|0-54:C>A-54:C>A	TGCAGCTGTCAAGCGCCTTGCCAGGCTGCTCAGGGCCTCGATTGATCTTGGTGCCGATAGAAAGAGGAA	3B-2	202.795
1119250	TGCAGCAGTGCCGCGTCCCCTCGCCGTACCACCCAACCATGGTAACCTCGTCGTGCTGCCCTCTCGCCT	3B-2	203.27
1106801|F|0-16:A>G-16:A>G	TGCAGCGTCACCACGCACCATGCACCGACGAACGCGCTGGCCGACGCGACATGCTCGTCTTCCAGGATG	3B-2	203.409
2283068	TGCAGGCTCCCCGCGTGCTGGAGTAGCACTTGAGGTCGTCGAAGCCGTCGGCGATGTGGACGACGAGCT	3B-2	204.092
2278702|F|0-50:A>G-50:A>G	TGCAGCTTGATCGTTCGATCGGCGTTGCTTTGCAGGCGGTGCTCAAGGAGAGAGCGAGGTACGTGCTGG	3B-2	205.544
1230268	TGCAGCTCGGCCCCGTTTCCCAGCTTCCTTGCTCAGCGGCAGCCCCACGCACTACTGTGCCTCGCCCCG	3B-2	206.585
3026778|F|0-23:A>G-23:A>G	TGCAGCACTGTAAAGGCAGCGCGAGCACGCAGCTGCACCG	3B-2	206.819
3534046|F|0-25:C>T-25:C>T	TGCAGGGTGAACCACGGGAGGCGGCCGCGAGCAGCGACCCGTCCCG	3B-2	207.899
1229563|F|0-26:C>T-26:C>T	TGCAGCGGGATCAAGCTCAGGAACATCAGGCTGAGGTACCGACACCAGCGGCCG	3B-2	208.095
1051251	TGCAGGAGATAACCGCAGTCCTCTTCTTCATACACTGTGAAACCCTCGCTGTCGGGATCAGCAGTGTAG	3B-2	208.413
1095926|F|0-45:G>T-45:G>T	TGCAGCGCGGCGCGTGAGGCGAAGGTGGCGGTGGTTTGCTGCACTGGCTCTCGCGCTCGTGCTCGTGAG	3B-2	208.546
3937441	TGCAGGGTTGAAGACAATGTCCGACTGGCAGCAGCCATTGCCG	3B-2	209.008
1092655	TGCAGCAGCGGCGATGCTGATATCGCCGCTCCTTGCTGGAGCAGAAGTTTATCCG	3B-2	209.128
1088035|F|0-42:C>T-42:C>T	TGCAGAGTATAACCGTCAGAGTTCAGAGTATAATAGATCAAGCGGCACATGACAGATGAAGAACACCGA	3B-2	209.835
1017811|F|0-20:G>A-20:G>A	TGCAGAGTTTCTTGAGTGGAGGGAAACCTTGCAGTTGAGGCAAAAGTCTGAAGACTAGAGAGCACAACT	3B-2	209.889
1229829	TGCAGCGGCTAGCCGTCCTAGGTTGTATCGGCAAAGACGGTGAGCCGCTGGCGCCACTTCCG	3B-2	210.122
1308134|F|0-19:C>G-19:C>G	TGCAGAGCACATCGGGAAGCGTCGATTCATTCCCTATGGTGGGGTGACCAATGGTCTTTGATTGCCCTA	3B-2	210.691
1098928	TGCAGACAGCATAGAAGCGCGCGAAGTCTGCGGCATCGTGCAGGCGGCCG	3B-2	212.307
1100459	TGCAGATGAAAACCTTAACACTTATGCTTGTTCCATGATGAACACCAAATTGCCG	3B-2	212.645
1228858|F|0-22:A>G-22:A>G	TGCAGTGGCTACCCGTGCTCCAACGAAACGCTCGCGAGCAGCTACCTGTGCTCCAATGTAGCGCCTGCC	3B-2	212.794
3958836	TGCAGGTCCTGTCGCATTCCAACAGCCACCCTCTCTCAATCCAGTACCATGGCTGCCG	3B-2	214.233
5577828	TGCAGAATAGATGTTGGACCTCGGACCG	3B-2	215.21
3959280|F|0-10:C>T-10:C>T	TGCAGATATACTATGCATATAAAGAGTGATTGAAGAATACCG	3B-2	215.47
1377407|F|0-41:T>C-41:T>C	TGCAGCATGGAGGGCGCCGAGTTCGTCCACGCCGTGGCTCCTGGTGTCACCGTGGCCGACGTCGTCGCT	3B-2	218.642
4537835	TGCAGAAGCGGATCCACGTGCGGAGGTTGGGTCCG	3B-2	219.938
1130833|F|0-59:T>C-59:T>C	TGCAGCGATGTCATTCCCATTTCTTTCACCCATCAAACCAACTCTTCACGAAGCATACATAGTTTTCTC	3B-2	222.295
1380350	TGCAGCATTTTGAAAGCCTCTGGTGGCGATCTATCCGCTAGGACAACATCACAGCAGCGAACATGAGGA	3B-2	224.123
4993603	TGCAGAGCGGAAGCCAGTGGAAGGGAGCCG	3B-2	224.663
2277982|F|0-10:T>C-10:T>C	TGCAGCCTCCTGTGGCTGAGCAGAGCAAGGATAGACCAAGCAGCAGGAGATCGAGGGAGGAGATACTCA	3B-2	225.698
985549	TGCAGGCAACTCTGGCGTTTGTGAAGGCGGCGCACGCGGACGCCATGCTTTACCTTGACATGGAGGAGG	3B-2	228.194
1235171|F|0-58:C>T-58:C>T	TGCAGCTTCGGGCGTCATCTTGTCCTTCGGTCCCAGCACCCCGAGCTCCTGTACAAGGCGCAGGGCGGC	3B-2	229.203
5568085	TGCAGGGTAGAGATCGCATTTCTCCGCTGCCG	3B-2	230.139
4992592|F|0-43:T>A-43:T>A	TGCAGATTTTTGTGCAGCTACATCGACAGTCTGTACTGCATTCTGCAACACCCGAACGATGATGTGACC	3B-2	230.81
1241932|F|0-32:T>C-32:T>C	TGCAGAACGTCAGGAGAAAGAGCTTGTGCAGATGAGCATGAGGTGCGGAAAAGACAACAAGGTGCTTGT	3B-2	230.897
1861787	TGCAGAGGCATACCTGGAGAGCTTGACGGTGGAGCTCGTGAAGGTGGATGACCG	3B-2	232.396
1259013	TGCAGGGCACTACTTTGCAGTAGGTGGTCATTGTCCATGTACATACTTTCTCCTCTCCG	3B-2	234.262
1213248|F|0-64:G>C-64:G>C	TGCAGCGAGCACTGCAAAGCGATCCGTGATACACAGCGAGAGCTACAGCGTCGCACAGTGAAGTGGTTA	3B-2	234.642
1064680|F|0-14:T>C-14:T>C	TGCAGAGCTTACACTTGCACCCGAGCGTGTCTATCTACAGCCGCATGAGAGGAAACAGAACAGGGGAGC	3B-2	237.101
1261268	TGCAGCGACAGGATGCAGCTGCACGACACAGGCCGTTCTAGCCAGGACGCTAGCGGCGATGTGCAGCGC	3B-2	240.805
4910923|F|0-5:T>G-5:T>G	TGCAGTCTGCGGACGACTCGTGCGGCGACAGCAGCGGCGCGGCGGGGTAGAGCCGCAGGGTCTCGCTGA	3B-2	241.488
1211784|F|0-52:G>C-52:G>C	TGCAGAATAGTTAGCCACTTGATAAGGCGCAAAGCGCGTATAGTACAGCTACGCGATCGCGGCCGAGAT	3B-2	246.807
992980|F|0-28:G>C-28:G>C	TGCAGCCGCGGTATCCTGGTCAGCACCAGGACGCACTCCTGCTGCCGTGCCATCTTGCCCAGCACCTGC	3B-2	250.995
1050598|F|0-43:G>T-43:G>T	TGCAGAATTGTCTGCACAGGGGAGGAAGGAGTACGAGTCTGAGGTGAAGATCATAAGCCG	3B-2	252.342
1380660|F|0-23:G>T-23:G>T	TGCAGCAGGGTATGAGGACACTCGGCGGCGTTGATCGGGTGATGAACGCGCGTGTGCTGCGCATGCTAG	3B-2	255.101
1130043|F|0-44:C>G-44:C>G	TGCAGCAGAGAGATCGCATAGCGGAGTCATCATCACTACTATCTCTGCTGCGCATTGAGCGACAGCAGC	3B-2	256.884
1200679	TGCAGGCGGTGATGGAGGCAGGGCCTCTCCTGGAGAACCTGCTGGTGGCAGGGCCG	3D	0
5332591	TGCAGTACCCAGCTTAGCGAAGCGATTTCCTCTCCG	3D	24.881
3947950	TGCAGCGGCGCCATGTCCATGAGCATATGCTGCATCACCATCACTGCCG	3D	28
1141383	TGCAGCTTTATGGTTTCACCCTCTTGGGGATGTACCCTAACCACCCCTACCG	3D	42.424
1140252	TGCAGTGTAGTACTATGCACACCCTATCTGCCGTCCATTTTCCACCTCATCTGATAGAGTTAGGCACCC	3D	44.681
1258529	TGCAGGTCATACTCCTTGTGCCGTTGCCGCCGACCAACTCCTCCTCCAGGTCCGCCG	3D	45.801
3953170	TGCAGCTGCAAGGCCTGTCAAGCAAGCGGTAGTCATGAACTGTAGCCG	3D	49.561
1117724	TGCAGCGCAAGATTGACACTAGGCGAAGGAGCGGTAATGGTGCAACACACCACCG	3D	51.808
1053484	TGCAGGATGAACAATGAGGAGTCACTTTTGGATGCATGGAAGCCAAGAGATAGCAAGAATTTTTGGAAC	3D	51.892
1121482	TGCAGCGCAAGATTGACGACACCAGGCGATGGCATGCCACAGGAGCGGTAATGGTGCAACACACCACCG	3D	52.58
12778785|F|0-23:C>T-23:C>T	TGCAGGCGGCGGCCGGGAAGTCGCTGGCGGAGGAGTTCCG	3D	53.89
1090667	TGCAGGATGCTACGGCAAAGGTCCCTTACGCGCGACGCGCGGGCAACTACCTTCATGCCGTGATTCGCG	3D	55.789
1094110	TGCAGGCGGAGCGCGCGGATTATGCAGCCGCAGCAAAGATCCTTGTGTACCCG	3D	55.795
3532870	TGCAGCCTCGCATGATGCCCAAGCGCTCGATATTCGCCG	3D	56.653
1049794	TGCAGATATACAGTTAGATTCAATGACCAGCTTGTTGCATCCTATTTTCCCTGCCAGATAAAGACCATT	3D	56.76
1217829	TGCAGTAGTGCAACCTCATCGTCCTTCAGGACCCACTTGACAACGAAGCTCCTCCG	3D	59.69
4993649|F|0-5:C>T-5:C>T	TGCAGCTGCTGCCTTTGTCCAGGAGGCCG	3D	60.64
998508|F|0-38:A>G-38:A>G	TGCAGCGCGGCCACCTCGGCCCCAGTCGGCGCACCAGGAAGCTCCAGAGCGGACACCTTCACATCGTAC	3D	60.775
5359771	TGCAGGGGTGCAAAGGCTGGGAAATATTGCCG	3D	61.627
4541423	TGCAGCACGGGCGCGCCCAGGTCGAGGTGACCG	3D	65.139
4394928	TGCAGCACAGGCGCGCCCATGTCTAGGTGACCG	3D	65.56
1116751	TGCAGCCAATGTTTTATGCAACACATATAGTTGGACTTTGGACCAAAATACATCAACCG	3D	65.763
2243560	TGCAGAGCACTACATGGCCAGGGAACCTCTCTGTCTTCGAGTGTGACAAGCTCCG	3D	66.063
7353414|F|0-11:G>C-11:G>C	TGCAGTTACGGGCACCCGCGCCAATGCCACCG	3D	66.524
7344780	TGCAGCTTGAGCACCTTGAACCCATCATGCACGGCGATGAAGTGGCGGGCGGGGTTGTACATGAAGGGC	3D	67.186
3533602	TGCAGACTGATAAAAGAGATAGTCTCAGCATGGACGCCG	3D	68.063
6027639	TGCAGTCTTGCCCTCGGTGATCGTGGCTACTTGGGTGATGGGATCGTGGAGGCGGCGCGTATCCGAGAT	3D	68.307
3957443	TGCAGCAAGTGAGACAATTGAAAGGAACGACCCG	3D	68.748
3384679	TGCAGAGTAAATCTACTTCCAGATGCCTGAAGTATAGACGCCCG	3D	69.202
4396072	TGCAGAGAGCAATGCTTCCTTTATAAGTGCCG	3D	69.675
3941331	TGCAGTACAGTAAGGAGCTTGGGGTGTTCCCAGTCCATGATGACCCCCG	3D	69.929
1138156	TGCAGACCCCTCCTCGCGGGACTCCAATTCTTGCAGATGTTGTCGTTCCGTCCG	3D	70.455
3959396	TGCAGTTTTCGCCTGACACGGTCATCCATAGATTCGATAGCCG	3D	70.617
5350252	TGCAGTGGTTCTGGCAAATATCCAGTAAAAAAGTCCCCCCATGGTGAGGGTTCAAAGCCG	3D	71.584
1078104|F|0-15:T>A-15:T>A	TGCAGTGGTTCTGGCTCATATCCAGTAAAAAAGTCCCCCCATGGTGAGGGTTCAAAGCCG	3D	72.242
1114321	TGCAGGACACCACCCCAGATCACATTGTTTGCACGCTATATGCCTCTGGAGTTTACGATGCCACCTCGG	3D	75.786
3944607	TGCAGGAGCGGTAAATGGGGGCAGGGACCAATGGCTTTGCCG	3D	75.826
2245455	TGCAGTGCACGCACTACATGATCACAAGCTTAGCTCGACTTCGAGGCTGCGATCACATGCCCCTTGACA	3D	76.472
1106351	TGCAGGAAGGAAAGACTTGCTCATCAACGATGCAGAGAGGTAACACCTGACACCGCCG	3D	79.388
1117920|F|0-56:T>C-56:T>C	TGCAGCTCCCACGTAAAGTTCAGATATTTTGTTGGCGTGCCTTGCAAGGAATCATCTCAGTAAAGGCTA	3D	79.834
1145273	TGCAGAGCATCATGGGTGGAGCAATGAAGCATGACCGATGCTTCAAGGAATTACACGCGCGGCACCGAG	3D	80.183
5410593	TGCAGAGGGAGGGGGGGTTCACCCG	3D	80.244
1117705|F|0-46:A>C-46:A>C	TGCAGCTTGATGCATGGTATATTTTGCTGCTCTGAAAAGAAGAAAGAAAATTTTACAGGTATGTGTATC	3D	80.795
7352287	TGCAGCTCCTCTAGCAGCACCG	3D	83.271
1125729	TGCAGATCACAACAACAAAATTACGAATCCTCACGACACATGAAGGGATAGAGAGAGCCCCG	3D	84.056
1234775	TGCAGGTATACTAACCGAAGGAACTTGGTTAATTGTTAATGGGAAACGATTCCTTACGAGGCCG	3D	84.28
4664268	TGCAGCGTCGAGCGCCGCCTCGGCCGCGGCCACAAAGGCGCCACGCCG	3D	84.786
1214792|F|0-27:T>A-27:T>A	TGCAGGAGCCAAGACAGAGTGCTCGCATTGCGGTGGAGGAGAAGAGCTGCCCG	3D	85.605
1222024	TGCAGGTGCTGCTCGCACATATTGCGTCGGCGGTGGCCAACCTCATAGATTCTTGTGCTCTGAATTCCG	3D	85.913
1217653|F|0-8:A>G-8:A>G	TGCAGAGTACGAGAGATGTGGGTAGTGGTGATGGGTGGTGAGGGGTTAGCTGCTAGGGCTCACGATGTT	3D	85.988
7491494	TGCAGCAAGGAAAGAGCGTCGTCGTGCCTGCCG	3D	86.507
3222453|F|0-11:C>G-11:C>G	TGCAGGGGCAGCGCTCCAAGAAGATGAGGGACACGGAGAGGAGCCCG	3D	86.825
983794|F|0-27:C>G-27:C>G	TGCAGCTGCGTTATTCATTGCTGAGAGCAAGAAGGGGGATTGGACAAGAAACTATCATGGTCTTGGCCG	3D	87.254
1115083|F|0-36:A>G-36:A>G	TGCAGTGCCCCTACCTCAAATAAGTCGTGTCCCAACACGATGATGTCAACACGGTCTACATGTCTACGA	3D	87.28
3936789|F|0-29:A>T-29:A>T	TGCAGGATCTCAACATGAACTTTGTAGGCAGACCG	3D	87.755
1020843|F|0-39:A>C-39:A>C	TGCAGCAACTTTGTTTAGCGGTCGCACTGAAGCTACGTGACGTAGCCAGCTCCACCTGCTCGCGTCGGG	3D	88.438
1237273	TGCAGTGGAAGCCAGTATATTTGAAGGGGAGGGTTGTTTTTTGGTCAGCCCAAACTCAAGGAGCCGAGA	3D	88.704
4539948	TGCAGCCTGAGCTCCTCCACCCG	3D	89.282
1009727	TGCAGCTGCTCCTTAGCCGCCACTACTTCTGGCGTGGCTGCCTGCTGCTGCGCGCTGGCCG	3D	90
5350055	TGCAGATCGGTCTCGTGGCGCAGGAGCCG	3D	91.329
1062786	TGCAGGCATGTTGCCTAGCAATGGAGAGATTGCACTCCTAGCAAATGGTGATGCAGATCCG	3D	91.466
1123609|F|0-39:A>G-39:A>G	TGCAGCAACCCCCCCACCGCGGCCAGATCCCGCACATCTAATCTCACTGAGATCCACCCTGCCCCCCGA	3D	92.655
3956609	TGCAGCTGGGGTCCGTCTACTCCG	3D	92.854
4395121	TGCAGAGGGGCCCGATCGCTCCCCTCTCCGAGGAGATAACAGAACCG	3D	93.777
1235264	TGCAGTCACGGGGAATAACATCCCACAGTCACGAGTTCCCAGCTCGCCCGCGATCACCATTTCTGCCGA	3D	94.328
1090783	TGCAGCCTGCTCTCGGATATGCCGACGAAGGTGCTGGTGATGCCAAACATGCCGCCGCCG	3D	94.832
4543201	TGCAGCCATACACTAGGTGCATCGACGCGCCCCCTGCACGCCACCGTTCGCTCGCCG	3D	95.075
3025106|F|0-7:A>G-7:A>G	TGCAGGCACTCCATGCTGTATGTCACGACACAAAAGTTGGCCG	3D	95.613
1233406	TGCAGATCCGCCACCCACCTCATGTTGCACCACAACAAGCTCTCCTTGCAACACCGAAGCCG	3D	95.764
3939350	TGCAGGTCTGCCTCTCTTTTCCCCTATTTTGGCCG	3D	96.542
3960573	TGCAGGAATCTGAATGTATTGGACTGACAATCTGGACGCCG	3D	96.689
5332280	TGCAGGCAGCTCGCCACGGCGGGTTACGGGAGTCCCCCCG	3D	96.719
7345946	TGCAGCGCCACAACCTAAATACGGCCGCCG	3D	97.896
7345816	TGCAGCCATTCACACCCCCCCTCATGGCCTCGCTGGCCG	3D	98.109
1110467	TGCAGAAGACAGTCACCACATGAGCAGGGAGTGCCACACATGCTCCATGCCG	3D	99.975
1370033|F|0-68:C>T-68:C>T	TGCAGGGTCTTGCGGTGCGGCGCAAGCGCCGTTGTCTCCATAGGCGGTGGTGGCGACGCAATCTCGGCC	3D	100.618
4537736	TGCAGCCACAGGCGCTTTTCTAGACCCCGCCG	3D	101.263
3954170	TGCAGGGAGCACGGAGACGACGTGAGTGCGATGGGATCAACCG	3D	101.505
21743476	TGCAGGGTAAAGTAGAGTGTGAGGAGATGATCGCTTGCTTCAAGAAAATCAGCTCCACCG	3D	101.599
4538282	TGCAGAGCTAGGTAGTAGGCTTCCTTTTCCG	3D	101.966
1257659|F|0-52:C>A-52:C>A	TGCAGCAGCAGCGTCAGCGCGACGGCGTCCGAGTGCGGCGACAAGCCCAGCACCCTGTCCACGTGCGCC	3D	102.068
4395256	TGCAGCAGCTCATGTCAAGTGTTTAACAATCAGGTGCACTGCTGCACCG	3D	102.557
3935403|F|0-18:G>A-18:G>A	TGCAGCATGTGGACGTGTGGGTACTTATAGCCTCTGGGTGCAGCCG	3D	102.817
3959177	TGCAGGAGGAGTGGCCCCGTAGGACGGTGGTGTTACGGCCG	3D	103.094
1382081	TGCAGCGTGTCCAAATGTGCATGTCTGAAGAGGCAGCCAAGTGTTGGGCTGCATAGCCG	3D	103.388
6037712	TGCAGCCCGTGGGACGGATGGTGCGATGTGCGCCG	3D	103.487
1120702	TGCAGCCTCCTTCCCCGTCAGCACAAGTCCCCCTAGTCGCGCGGTTAGACCCGCCGCCTCTTCCACCAC	3D	103.962
5968432	TGCAGTCTGCACTCTGTTCTCCCCTCACCCG	3D	104.003
7347253	TGCAGACACAGGTTGCAGCTTTCCCAGCCG	3D	105.124
1116059|F|0-36:T>G-36:T>G	TGCAGCCAAAAACTGGGTAGGCATGTAGACGCGTTTTTCACACAGTGCGACTAACGACAAGAAGGGATC	3D	106.257
3023533	TGCAGGCTTTGTCTTCAAGGAATCTGAACGAGAACTATCCAGGCCG	3D	106.652
1095501	TGCAGAACATCTGAATGTGGAATAGTTGCGCTAGCCATCTCACCTGCATGTAGGCTTCGTGCAAGATGT	3D	107.114
5350140	TGCAGCTCCGCCTGCTCCAAGAGTGTGAGCCG	3D	107.239
2252305	TGCAGTAGCCGAACGGAATCAGGCTCGAATCACGCCGCCCTCATCTTCTCGCCGAGCGTCTGCTGCACG	3D	109.008
5324022	TGCAGGAGACCACCTTGCTGCTGCCG	3D	111.782
4542814	TGCAGTGTAGCTTAGCACAGCGACCCG	3D	114.7
7491862	TGCAGCGCCTCCTTGGCCTCGAGGCCGAGACCCG	3D	118.38
3934704	TGCAGCGGCAACTCGACGAGCTGCGCACCCAGGTCGGCCG	3D	122.996
3957031	TGCAGGCAGCGAGTGGGCCGACCCATGCCCATTCTTATTGGTCCG	3D	123.844
4537626	TGCAGGCAGCAATAGCTGTGCACGGGCCACCG	3D	124.157
21718644	TGCAGGTCTGCCTCTTTTTTCCCCTTTTTTGGCCG	3D	127.308
5323738	TGCAGGGCCTCCACCATGACCG	3D	128.99
3064951	TGCAGGTTCTGTATGCAAGGTCACATTCAATATCTTTCAGCAGTCCCG	3D	133.313
1243606|F|0-23:A>G-23:A>G	TGCAGCGGCAACATCACTTTGCCAGAGCTCGGCGGCGTCTCTGGCTTCGCCG	4A-1	0
1225986	TGCAGCCGCCACACACGGATGCTGTGATGGCACTATGCCGAGCTGCTACCTACACCTCGGAGAGTTGCA	4A-1	2.156
4394620	TGCAGTTCCCTCCGAGCTCCG	4A-1	3.466
7348301	TGCAGTATCGGCGGCGACGAGTCTAGTGACTTGTAGCCCCCACTCTCGCCG	4A-1	3.894
1222960	TGCAGAAGCTGGCGGACAGGAGCTAGCCCATGGTCTTCGTCGCGTATGAGCCG	4A-1	4.505
4989948	TGCAGCAGCGGCAGGTGGGAGCTCGGGATCGACGGGGTTAGGCGTGGCTGGAAGGGAAACCG	4A-1	5.617
12778228	TGCAGCAGCATGTCCTAAAGTGTAGACCG	4A-1	6.422
3943911	TGCAGCGGGGTGTCGTGGGGGCCCGTCGTGGCCTGGATCCG	4A-1	6.803
1260997	TGCAGCTAGCTGGTTACGTACCACTAGCTGCTCCATTCTTCTCTTCTTCTCATAACTCCTTCCACCCGC	4A-1	7.236
4991380	TGCAGGGACCGTCCATACCAACGGGCACAGGGCCG	4A-1	8.53
2256922|F|0-37:G>A-37:G>A	TGCAGGTCGAATCCCTGAAATCCTCCACAAGATGAAGGAAGGCAACAAGATGGTCGATCCGTCACCATA	4A-1	9.04
3946298	TGCAGCCTTTCCCCTGGGCGCAGGTGCCGCAGTGTCGCCG	4A-1	9.401
1064199|F|0-55:T>C-55:T>C	TGCAGTAAATTAGCCTGCCTTTGGCAGTGGCAGCAAAGCGCCAACCAATCAGTCGTGCCATGCAGTGCT	4A-1	10.226
5411046	TGCAGCGCCGAAGGAGTGGACCGCGGCCG	4A-1	11.879
3534072	TGCAGGGAGGCCTTGCGCATGATGGGCAGGTCCGCGAGCGCCG	4A-1	12.291
1124023|F|0-58:C>A-58:C>A	TGCAGCAGGAGTAGAGTCCGTTGTCCGAACGAAACCAACAGCAAGTTACCAAGCCATTCGTTTTGATGG	4A-1	12.297
1035946	TGCAGTTATGCCAACCACTCGCCGTCTTTGTACTTCTCACACGTACATCTTGCCG	4A-1	13.147
6050215|F|0-8:T>C-8:T>C	TGCAGCTTTGGTCCGCTCGGTCGGACCG	4A-1	13.491
1047503	TGCAGGCGTTAGAACTTGTTAGAGTAATCCAAGCATATGTGTTATACTTTGATAAGTACTAGTACGTAG	4A-1	14.189
3941712	TGCAGCAGCCACTTCTCCTTACACTCTTGGGGAGGACAACCG	4A-1	15.345
3534063	TGCAGAAAGCTCAAGACACTGAAGGACATGGATGCACTCCG	4A-1	19.397
1281398	TGCAGAGCGGCGGCTCCATGTCGTTGGGAATGGGAGATACAGCAATAGGGCAGCCG	4A-1	25.61
1245163	TGCAGGAGTTGAGAAGCGAGTACTGGCCGAGCTTGTTATCCCACCAGTGCGACGGGTTCTTTGCCCGAG	4A-1	27.281
7347656	TGCAGCAGCACAATGCTGAGATATGTGGGGCCG	4A-1	28.75
1082494	TGCAGGGTGGACGTCTCTTTAATGTCTGCGCGATCTGTGTCAAGCGCTCAAGTTTGCCG	4A-1	29.482
1086403	TGCAGCGAGCGGAATTAGCGCGAGGAGGAGCGTCAATCCTCAAGGCGCCG	4A-1	31.905
5411490|F|0-18:C>T-18:C>T	TGCAGTCTATGCAGTCTACCCGATGACCG	4A-1	32.598
4538086	TGCAGCATGGAGGGTCTCCATCTCCG	4A-1	34.712
21743441	TGCAGAATATACTTGAGAGTCGATGGCCATCTTCAAATTGAGGCTCTCATCTTCTTCACCG	4A-1	36.772
5994328	TGCAGACTGCACCGTGTCGCCGAGAAGGCCGGTGAGGGCCCG	4A-1	37.876
981760|F|0-58:C>A-58:C>A	TGCAGGTGTTTACTCCTAATGGTGTCGCCTACCCCAAGGGCATCAAGCGCGCGGAAGGCGTTCGTCCAT	4A-1	38.468
1167113	TGCAGGTGCCGCAGCGGCAGCATGCTGGCCTTGCCGAGGTGGCCCAGCTCCG	4A-1	38.473
2277661	TGCAGCCTCGCAACGTCTATCTATCGACTTGAGGCTCCAACGTAGTTATCCGCTGCCGCAACAGCGTAC	4A-1	39.674
4991098	TGCAGGGACATATGCAGCACCCCCG	4A-1	41.128
3952207	TGCAGGTGTCAGTCGTGTGACCCG	4A-1	41.391
1012138	TGCAGGGGCGGCGTGTGCGTGGCGGGGGACGCGTTCCACCCGATGACCCCG	4A-1	41.651
3533721	TGCAGGCAAAGTGCGAGGTCGATCAAATCTGCAACCGTATTGCCG	4A-1	43.374
984312	TGCAGATCCACTAGTTGAGGAATAGCCACGATAGAAGAAGGAAAGCTTCGTCTGCGGGCTGTGCGATCC	4A-1	44.614
2275625	TGCAGGGGTATGTTATCGATGCTGTACTCGTTTTTTCTATACATTTACAACAGTCCG	4A-1	45.964
1030108	TGCAGACCGCGTGGAAACGGACGATGTCGGCGGGGTGTTGGAGGTGGGCGGAGACCGCGAGGATGAGAT	4A-1	46.218
3028018	TGCAGCCGCCACTCCAGTGGGGTTGGAGTTCGTGACGCCGCCCTCCG	4A-1	47.114
1101854	TGCAGCAGCATCCGACCATATCCCCGTAATATAATTCATCTACGACGGCATGGAAACTTGAGCCGAGAT	4A-1	47.931
5332668	TGCAGTCGGCAGAGCAGGGGGCGCCGTGCCCG	4A-1	48.76
1104326	TGCAGCAGAGGGCAGTCAAGGGGGCGAGCAGGATGGGTCCAGCCGATTTCTTCGCCG	4A-1	49.912
12771862	TGCAGCACCCCGCGTGGCCG	4A-1	50.293
4991217	TGCAGCAACCGTAATACAATCGCATGTAGCCG	4A-1	50.7
4008765	TGCAGGGAGAATGAAACAATTTCAAGAGCTCAATCCG	4A-1	50.792
4535957	TGCAGACAGATTAGGGCCAAGATCGTCGCCG	4A-1	53.638
3936718	TGCAGACATCTTTGGTTGGGCCGCGGTCCGCGCGGTGTAGCCACCG	4A-1	56.088
1674585|F|0-35:A>C-35:A>C	TGCAGTAAATTAGCCTGCCTTTGGCAGTGGCAGCAAAGCGCCAACCAATCAGTCGCACCATGCAGTGCT	4A-1	56.605
4410078	TGCAGCGGAACTTGGCGGCTCCG	4A-1	59.636
3025953	TGCAGTAAACCCTACATGGTACGCCGCCGCAAAGCTCCCCG	4A-1	60.916
1213738	TGCAGTGGCAGGTGTGTAGCGATCGCAGAAGGCGGCTGCTAAACGAAACCG	4A-1	61.355
5410364	TGCAGCGGGCGCGGTGTGGGTGCATGGGTGGAACGCGGTGGATGCACGCGAGTGTGGCTGGAGGCGGGG	4A-1	61.375
3034540	TGCAGTCTCAAATAGGATTTGCCCGATATTGCAGCCG	4A-1	61.822
7345865	TGCAGCCGCGGCAGCCCCATGGATGACGCCCCG	4A-1	62.326
1695672	TGCAGATCATCTCGGCGCCGTCGTCGCCCAGATCCAGCTCCAAATTCGCGCTCTTCCTTCGATTTGGCC	4A-1	62.823
5410622	TGCAGGGAGAACTAAATCTGGGACCATTATCTGCCG	4A-1	63.352
2252368	TGCAGCTAGACCAACATGGCCACCTTCACATGTTTCTTCTTCGGTCATCAGTGCATCGAACACACCCAC	4A-1	63.667
1050524	TGCAGCAACTCTGTTTACAGCCTTACAGATGATCCGACTTGAATGCTAAGGTGGTCCTCCATTCACACT	4A-1	64.408
1203035	TGCAGCAACCGCTGCTCTGCCTCGTCCCTCACCCGCCAGGAGCTCCAACGCCACGCCGCCCCGTCTTGC	4A-1	64.736
1090225	TGCAGCAAGTCAGAGAGAGAGAGAAACAGAGGAGGATTGAAGGAGCAGGGGCGAGGCTTGTCTGTTGGG	4A-1	64.972
1246181	TGCAGGTCGGCGGCCCGCCGCGGCGATTCCCGCTGCATGTAGGCAGCTCGGCGGACCG	4A-1	65.353
7940361|F|0-27:T>C-27:T>C	TGCAGCTTTGGGTGTGGGGCTATGGGGTGGCGTGGCGGATCATAGCCACCGCAGCGGGGCTTGGCCGAG	4A-1	65.638
3385473	TGCAGCGTTTGATTGTTTCGTCGATATCTCAACACTCCG	4A-1	65.724
3953263	TGCAGTGGTGGTCAGCACCAATGGGGATGGGGCACCG	4A-1	65.764
1265666|F|0-23:T>G-23:T>G	TGCAGCTGCGCCCAGTCGTCACATACGCGACCCGCCATCGGCTATGCTTGCTGGCTCCGCCGCGTCGTT	4A-1	65.788
7940866|F|0-10:G>A-10:G>A	TGCAGCATCAGATTGTTTCGCCCACAACTCGACGCTCCG	4A-1	65.803
5411677	TGCAGGCACGGGCGCTCGAGGAGCTCCTCTCCTCGAGTGCCCG	4A-1	66.058
7350586|F|0-13:A>G-13:A>G	TGCAGCGAACCAAACACTTTTCCG	4A-1	66.377
1128742	TGCAGGCGCATCTTTAATCACGACTGCCACGAACCGCAGGCAATGCAGCGCCGTCCACGACTCATGTAG	4A-1	66.615
2276744	TGCAGGTCGCTTAATCGCATCATGAGAGTTAACTAAACACTTGTTTCGACGGTGCTTGGTGGTCACCGA	4A-1	66.69
1010923	TGCAGGAGGTGGGAGGCGGGGCACTTGGGGCGCGGTGTTGCTGGACGACGCCG	4A-1	66.85
1047699	TGCAGTTTCCAGGAGAGGACAGAGAGCAAGTGAGAGAGGTAAACGGAGGGAAGGGAGATACAGGGGAGG	4A-1	67.845
1249083	TGCAGCTGGTCGCCCAAGGGGGACTGGGTCGTCTTCTCCTCCACGCGCGAGATGCCG	4A-1	67.969
7347969	TGCAGCGCCTCGCGGCTGCCAATGGCCGACGCCCG	4A-1	68.29
7940866|F|0-19:G>A-19:G>A	TGCAGCATCAGATTGTTTCGCCCACAACTCGACGCTCCG	4A-1	68.644
3026361	TGCAGCAACAGGGCATGGCAAGGCGAGCAACTGTGCCG	4A-1	69.078
7940533|F|0-7:T>C-7:T>C	TGCAGCGTCGCACGCTGGGCCG	4A-1	69.262
3937123	TGCAGGGGGCAATGGAGGTCAGAGGAGCGGAGGACCG	4A-1	69.633
3950330	TGCAGCGGCGACATCACTTTGCCAGAGCTCGATGGCGTCTCTGGCTTCGCCG	4A-1	70.411
1233312	TGCAGTGACTAGCAGAAGCTATCACCGCCACCATGACTAGATCTCATGGTATCCG	4A-1	70.91
4397481	TGCAGCGATCTGGCCCAACTTGTGTAGTGTCCG	4A-1	71.475
7491996	TGCAGCGTTGGTCTTGATCCG	4A-1	71.7
1104910|F|0-39:T>C-39:T>C	TGCAGCGTTCGTGCGCTGGGAAGGAATTCTGCTGTGTCTTCCTGCTCATTCTTCTGCTGTACTCCTCTT	4A-1	72.11
1025541|F|0-14:A>G-14:A>G	TGCAGCGTTCGTGCACTGGGAAGGAATTCTGCTGTGTCTCCCTGCTCATTCTTCTTCTGTACTCCTCTT	4A-1	72.119
1216185	TGCAGTGGGAAGTTGGCGGCGTAGGCAAATAGCTGCGGGATGACCCATCGCGTGTACCGACCG	4A-1	72.603
3533634	TGCAGCGGAGGAGATGCAGCCAGTTGATCGGTCGAGTAGAACCG	4A-1	72.856
3940981|F|0-20:T>C-20:T>C	TGCAGTTTTGCCGCCACAGGTGCCG	4A-1	73.558
1271659	TGCAGAGCTGTAATCAGTCTAAGCTTGTTTTCCTTTGCTTCACCCACCGAGTCATCAGCACACCCGAGA	4A-1	73.605
2275920	TGCAGAAAGAAACCGTGTCTCTCTCGCTCGTTTCTCGATGAGTAAACTCCG	4A-1	74.435
9364838	TGCAGTCCGGCTTCGGCGGCCG	4A-1	75.279
4002887	TGCAGCAGATTGTCGCTCGCACGCACAGGGGGTCTACGCCTGGGCCG	4A-1	76.298
5968524	TGCAGGTCAGGTCCTCTAGCGTGGCCG	4A-1	76.68
5373660	TGCAGCTCCTGCTTGCCGTGCGGCCG	4A-1	78.365
3029102	TGCAGCTGGCACGGCGTCAGCTGCACGGTGCACCAGCGCCG	4A-1	79.141
6049794	TGCAGCCATGCCTTGTACTCGGGCGGCGCCAACTTGCTCGGTTCCG	4A-1	79.359
3942509	TGCAGCCTGAGCAAGAGCAGACCG	4A-1	80.481
4394935	TGCAGTACACACTACCTCCCTTGCTGGGCCG	4A-1	82.168
7338643	TGCAGCTGCAACGTCATGCCG	4A-1	82.57
1019552	TGCAGGGAGCAATGGACGAATCAGCGCTCAACCGAGGCCACCAAGGATACCG	4A-1	85.488
1113478	TGCAGCGAGACGACTCAAGGCTGGAGCAAGGCGGCTTGTAGTACAAACGAGCGGCTCAAAACCG	4A-1	86.494
5332067	TGCAGCTCCTGGCGGCGGCGCGCCG	4A-1	86.6
3937233|F|0-27:G>A-27:G>A	TGCAGGCAAGGGAGGGAAGGGTTGGACGGGGCTGCGCCGCCG	4A-1	86.952
7492207	TGCAGGCGAAGTCGCAGCCG	4A-1	92.144
1161818	TGCAGCCTTGTTGCATGTCATCTCTGCCAGAAATGGACGAATGGAGTCCG	4A-1	92.518
1043752	TGCAGGGGCTTCTTGGAAGAAGTCATCGGGAGGGAGAAGGTGGCGACTTGTGGTAACCG	4A-1	93.621
4395815	TGCAGCATGCTGATGACAGAGCCGCCACCACCCG	4A-1	94.264
7327324	TGCAGCAGCTGCCCTCTGTCCCCCG	4A-1	97.018
1377569	TGCAGCGGCCTCCTCCTCGTTGGATGCGCCATTGCTGGCTCGTGCGATGCGGGGAGGTGATGTACTCAT	4A-1	100.18
4003876	TGCAGCTGGCGAGGAAGACGGCGGCAAGGCTTGGAGGATGTCCCG	4A-1	104.668
1130005	TGCAGGGGCTGAAGCAGCGCTACCAAGACTACCATGGACTGATAATTCGCGACGACGCTCTGGTCACTG	4A-1	106.453
3943911|F|0-15:T>C-15:T>C	TGCAGCGGGGTGTCGTGGGGGCCCGTCGTGGCCTGGATCCG	4A-1	107.337
4008764	TGCAGCTTGTAGGGAACAGTGGCATGCAGGGAACAGTGGCATCCG	4A-1	112.494
1094293	TGCAGGCGGCAAATAGACCAGGCTGTACTTGGGATGTGGCGAGTTGGGCCG	4A-1	116.883
3935853	TGCAGGCGGTTGCCACGGGACCTGCCAGGCCTGAACAAGGCCG	4A-1	120.108
3384593	TGCAGTTTACAAGTTTCTTACATTATCTGGACTGGAGTCCG	4A-1	122.546
1310918	TGCAGCCTCCGCGGACCCATGCCCTGCGCCTGGGCGTCGACAGAGCTCCG	4A-1	124.474
1117137	TGCAGCATCCAGCAAATCGTGAGAGCCACTTCCTCTGTAGTAAATGCCAACGGGGAACCGCCG	4A-1	126.915
988316	TGCAGTACAACACGGACTGGATGGGCCGCGAGATCTACCACGGCAACCCGAACGGGGTGGCTGACGACA	4A-1	127.417
1218178	TGCAGCTTGCGTTCGTCCACGACTACTTCAACACCCGCTACCCCATGGTGTTCTGGTCTGGCCTCCGAG	4A-1	127.988
4397526	TGCAGCAACGCCATGGACACCGAAGGCGGCGGCCG	4A-1	128.394
1160151	TGCAGAACCCTAACCCTGTGTTTCTCCTCTTCCTGATGCAAGTTCGTCTGGTGGTTGATGGCGGCCATG	4A-1	128.811
985921	TGCAGGACGAGGAAGATAGGATAGTCCAGACGGATATCAGCGATGATGGCCTTCTGAAGGTGATGGACC	4A-1	129.235
3385404	TGCAGAATGTGTTTACTCGCAAATTAAGCAAGGCAGGACTTAATCCG	4A-1	129.569
1233808	TGCAGAGTTTTATCCCACGGCTCCGTGGACTGCCTGTGTGAGATCCGTGAGCAGTTCAAGCAGCTGAAG	4A-1	130.128
4407703	TGCAGACCTAGGGGGCAGAGCAGCGGGTGCCG	4A-1	130.729
1214061	TGCAGGACGGAGCTCCGCCTGACTATGATAGTTCACGACTTATTGTTGTAGTTGTAACCG	4A-1	133.9
3027119	TGCAGACTACAGTACTGCTCGTTTGTTGGGCTGTGAACCG	4A-1	137.218
1113417	TGCAGTTTGGTTCATTGGAAGTTGGGTTCTGGCGACAATGTCCTCTTCTGAAATGATCGCCG	4A-1	141.923
5357771	TGCAGCCTGGCGGCGGGGGGCGGGCCGCACCTCGCCGAGAAGATGCTGGCCG	4A-1	144.128
4262923	TGCAGTCGGAGGACTCGAGGAGAAGCCATGGCAGCGCGGGACGGGGCACCTCCGCACGCGCCACAGCGC	4A-1	147.969
1111604	TGCAGGGAGAGATAAATCTGGGACAAAGATCTTGCAATTGCAATGAAGGAGATTGGAAAGCCCTCCGAG	4A-1	163.774
3938164	TGCAGGTGGATGGCCATAGGAAACGTCCTGGGCTATATGGCCG	4A-1	165.794
7491253	TGCAGGCCCCCGCGACCATGACGAGGCTATGCGAGCGGCACTGATGCACCTCGTCACCATCACCTGCCC	4A-2	0
1698953	TGCAGGCCAGGGTATGCGCGCGTCCACCATGTGCTGCATGCATTCGGAGCTATCTCTTCGCCG	4A-2	2.794
1002784|F|0-40:C>A-40:C>A	TGCAGCACGTTCCAGTGCCTGCTGGCGCACGTGTGGAAGACGGTCACGGCGGCGCGGGGGCTGAGCCCG	4A-2	4.115
1224010	TGCAGATGAACCGAGGTTTGTTTAGTGACACGGCCTTTAGTAATTCGTGGCTGTCTTACATGCAGTTAC	4A-2	6.429
1229623	TGCAGCCACACAAGCTCTATCTTCCTTCAGCGCGGCCAACAAGACTTGCTCTACCGCCG	4A-2	10.734
3944144	TGCAGATCACAAAAGGCCTACCAACATGACTCCG	4A-2	19.979
7489564	TGCAGGCTGAACCCCAGCTTCTTCGGTCCATCAATTTCTGGCAGATTCGCCGCCG	4A-2	23.846
1112403	TGCAGCACATTGACATAAAGATCTGTTAAGCGAACATGAAAAAGTAAACACTACTTCCG	4A-2	27.767
2275920|F|0-41:G>C-41:G>C	TGCAGAAAGAAACCGTGTCTCTCTCGCTCGTTTCTCGATGAGTAAACTCCG	4A-2	32.559
1317604	TGCAGGGTGGACGTCTCTTTAATGTCTGCGCGATCTGTGTCAAGCGCTCAAGTTTGCCCTGGTGGAGAT	4A-2	32.965
2248753|F|0-15:G>C-15:G>C	TGCAGCACTATAGGTGGATCTAGTGGCCTATTTGATCTCCTCTTCATGCTCGATGTTGAACAGTACGAA	4A-2	35.735
3027897|F|0-20:C>T-20:C>T	TGCAGCATCTCGCTGCTCCACGGGGACCCGTCGGCATCAGCGCCG	4A-2	35.736
4538087|F|0-32:G>A-32:G>A	TGCAGCTGCATTATTGTTTTTGTCTGGACATTGTTGTACTATGTTTTGGAGCACTGAATCTCGCCGAGA	4A-2	37.101
1054658|F|0-58:T>C-58:T>C	TGCAGCACTACATAGGTCTAGTGGCCTAATTGATCTCTTGACGCCTCGTGGTCGGTGTTGAACAGGAGT	4A-2	38.015
7328626	TGCAGCAGCATCGCCTTCTTCACGATGTACCG	4A-2	38.134
21743538|F|0-26:G>A-26:G>A	TGCAGGAGTTACATTTGGGCAACAGCGATATTACCGGAATCATGCCG	4A-2	39.004
3021525	TGCAGGATTGGTTCTTTAAGCTTGGTGCTGCTGTAGAACCG	4A-2	39.788
7487510|F|0-31:A>C-31:A>C	TGCAGCTTGTACTCGTCCGCGAGGAGGTCGCAGAGCTTGAGGAGGAGGCTGCCCATGGCCCCCGTCTCC	4A-2	40.3
1196161|F|0-58:G>C-58:G>C	TGCAGCTTGTACTCGTCCGCGAGGAGGTCGCCGAGCTTGAGGAGGAGGCTGCCCATGGGCCCCGTCTCC	4A-2	40.394
1094875|F|0-54:T>C-54:T>C	TGCAGCCTTGGCCGCAGGCTGGGGCCGCAGTGGAGAGCACCGCCGCGCCGCTTGTGCCCG	4A-2	42.187
5325008	TGCAGAGCGGTGGTTCCATGTCACTGGGAACGGTGTGGATACAGCGGCGGGGCGACCG	4A-2	42.388
1139118	TGCAGCATTGTCTGATTTGGCATTTCTTCGGTGGTGGGCATGTTGGTGTCTCACTTCTATCCG	4A-2	42.482
1125252	TGCAGGGTCAGGTTGTGGAGAGCCCCCATGAGCGCCGCCTGATCCACTCCATCCG	4A-2	43.236
1012420|F|0-18:C>T-18:C>T	TGCAGCTCCTCCTTGCCGCGCGGACGGGACGACGAGCTGCCGCCATGGTCATACATGTCCG	4A-2	43.45
1109455	TGCAGTGCAGTCATGAATAAACCCCCCTTCTTCAATGGGGAAAGACTGGAACCG	4A-2	44.109
1252977	TGCAGCAGCTCACGGCCGCCGTCTTCCTCGGCCCCATCGCGTACCTCCG	4A-2	44.652
1093617	TGCAGTGTTGCGGTGGAGGCTTTGTGGGCCAAATCAGGGCTCGGGCGGGCTCGGGAGGCCTAGTGTGCC	4A-2	45.138
1071064|F|0-45:G>A-45:G>A	TGCAGCATGGCGTTGCTCCACGGGAAGCCATCGGCCTTATCGCCCGCCGTCTTCTCCGACGACGGCACG	4A-2	45.57
3952505	TGCAGACCCACGTACACTGCCCATGCAAACCG	4A-2	45.947
1736132	TGCAGCTCTACTGCCTCGCGCCGCTCCCGCCTGGCTGCGCGCCCGCGTGCTGGCTCCTGTCGCTGTTAG	4A-2	47.077
1105228	TGCAGGGATTTGGGGGGAGTGGTCACCCGTTCCCAATCAAATATCTAGGGCTACCTGTCACACCGAGAT	4A-2	47.213
1210951|F|0-54:G>C-54:G>C	TGCAGGCACGGAATTATAAACAACGGCGAGTGCCATCCAGGAGGAGCTAGCTAAGTGCCAACTAGGTCA	4A-2	48.766
2255871|F|0-39:C>T-39:C>T	TGCAGTTTGACGTCTTCGAGTTCCACACAAAACTAGTCGCGGGGATCACTTCTCTTCCG	4A-2	50.938
2253908|F|0-9:C>T-9:C>T	TGCAGGCTCCAAGAAACACGAGGAGCGGATCGATCCAGGGGACTAGTCTAGTTAACCGTTAACAACTTC	4A-2	50.962
4991112	TGCAGGCCCAGAAATAGTTCTCCACTAGACGATCCG	4A-2	51.326
4990335	TGCAGTCGTTCGCCGCCACAGGAGCCTCGCGCCCG	4A-2	52.75
984428	TGCAGAGAAAACGACTCGGAGTCCGATGCGGGCGGCCAGCGAGAGTGGTAGAAAATGAGCCG	4A-2	54.456
2276355|F|0-27:G>A-27:G>A	TGCAGATAAACAGCATCAGCTCAGTTCGCGGATCGATCGAGCATGTAAAATGGCGACAAACAGTAGAAC	4A-2	57.211
7492585	TGCAGTGGCTGGGGTCGTCTGAGACACGGCGTACGCGGTGGCTGCTGGTAGCCCTCGCCCGCGACCCCG	4A-2	57.64
7340193	TGCAGGAGCTCCGTCCCCCAACGCCGCCGCCG	4A-2	58.081
1145764|F|0-44:A>G-44:A>G	TGCAGTACCAGCATTACTTGAAGAGAACACACGTACGCGTGTGCACCCG	4A-2	58.685
1226873	TGCAGGCCGCTGCCCAGCTCCCTCGCGCCACCACCACGCGAGTCTCCCTGCCCCTATTGTCCGCCGAGA	4A-2	59.067
1081239	TGCAGAACACGGCAGATAGGAGGTCCCGACCAAACGCGCACTTCTCGGTTGGTTGCTACGTTAATTTGG	4A-2	59.334
1126422|F|0-26:A>C-26:A>C	TGCAGCAAGCAGTACATGCTTCTGTCACGTGGCTAATGGGCGCGCGGCGCGTCCCCG	4A-2	59.5
1090647|F|0-21:A>G-21:A>G	TGCAGCCATGCCCGAACCTCCATGGCGCGCCGCCCCATGCTCCGCCAGCGGTCGCCTCAACCTCCAGGT	4A-2	59.838
7492131	TGCAGGTACGTGAGCATGTCCCCGAACGCGGCGGCGTCGTGGGCGAAGGCGCCCG	4A-2	60.073
1127107|F|0-10:T>C-10:T>C	TGCAGCCAACTAACCCGCATCGCTCGCCGATTTCCTCGTGCCCGAGGCCTCCAAATCACTCCTCGCCGA	4A-2	60.173
1203639|F|0-25:T>C-25:T>C	TGCAGAGAAAACTCAAGCCGCACTGTATGCAGCCACCACAACCTCAAGCCGAGCTCCCGCGCCCACCGA	4A-2	60.359
1037044|F|0-57:T>C-57:T>C	TGCAGTTATCACATCCTTCTCACGCTCTGCATCGGAGACAAACAAGCAGCGACCCAATACTGTAGCTTG	4A-2	60.724
1010923|F|0-38:T>G-38:T>G	TGCAGGAGGTGGGAGGCGGGGCACTTGGGGCGCGGTGTTGCTGGACGACGCCG	4A-2	60.924
4734030|F|0-8:A>G-8:A>G	TGCAGGAGATGGGAGGCGGGGCACTTGGGGCGCGGTGCGGCTGGACGACGCCG	4A-2	60.928
1266108|F|0-64:G>T-64:G>T	TGCAGGCTCAACGGCCAAATGACAGACAGCTAGATCTAGAAGGAAAAGCCTTGCTTCAGCCAGGGTCCG	4A-2	61.154
1181699|F|0-49:A>C-49:A>C	TGCAGATGTGCTACTGTACATTGTTTCAAATGCCTGAAGCTCTGTGTGCAATGCATACGGCAGAGTGTA	4A-2	61.343
3021112	TGCAGCCTCTAGGTACCCATTGTTGCCGTTGTTGCTCACCG	4A-2	61.727
1204491|F|0-26:G>A-26:G>A	TGCAGCCGTGCCCGAGCCTCCATGGCGCGCTGCCCCAAGCTCCGCCCCCGTTCGCGTCAACCTCCAGAT	4A-2	61.822
1674716|F|0-32:A>T-32:A>T	TGCAGCGAGCCACTTCCGATCGTGCCCTTGCCATTTGAAGCGCTCAAGCAGCCTCGGAGAAGGAGAGGA	4A-2	61.84
1000671|F|0-17:C>T-17:C>T	TGCAGATTGGGAATCGGCGAGGCACAAAGCGACGGCGGAGACGCAGCCG	4A-2	61.883
1006175|F|0-19:A>G-19:A>G	TGCAGCATCCAGTACCACGAGCTGAGGAGTTGGACGTGGCGGCGAGGTGCACCG	4A-2	61.883
1089793|F|0-42:T>C-42:T>C	TGCAGCGGATGGCTTCAACGTGCTGATGCCCAGCAACATAGATACAACCATAGCCG	4A-2	61.883
3532657|F|0-27:T>C-27:T>C	TGCAGCTACTGTACTTCGCCTTCGCCTTTGCCACCCG	4A-2	61.883
982374|F|0-26:A>G-26:A>G	TGCAGCATAGAGGAGAGCTCACTGCTACGGTGGGCATTGATAGTGGAGAGCTGGGAGCCG	4A-2	61.883
995929|F|0-21:A>T-21:A>T	TGCAGCCGCCGAGGCGCTGCCAACTCTAGACGAAGCCCCGATGCCATGGCCG	4A-2	62.11
3945729|F|0-17:T>G-17:T>G	TGCAGCGAGAGTTTGCATGGGAGGTCCGGGACGAGCCG	4A-2	62.209
3025755|F|0-9:C>G-9:C>G	TGCAGTTACCATTGGGATTCGTCCCTGATAATCATCGCCGCCCG	4A-2	62.424
1204491|F|0-29:C>T-29:C>T	TGCAGCCGTGCCCGAGCCTCCATGGCGCGCTGCCCCAAGCTCCGCCCCCGTTCGCGTCAACCTCCAGAT	4A-2	62.534
2261946|F|0-12:G>A-12:G>A	TGCAGGAGGCGGGGGCGGTGAGCTAGAAGTCGAGATCGTCGGAACTTCGAGCAGGTCGGGCCCG	4A-2	62.535
1049565|F|0-53:C>A-53:C>A	TGCAGTACGTCTTTAAGTGTTCCAAACAGGAAAACATTTCGTTTTTGCATAAACGCCCCAGTAGTTTCC	4A-2	62.905
3954660|F|0-12:T>C-12:T>C	TGCAGGCCCTGGTAGTCGGCCTGGCTGATGATGACGCCGTCGCCG	4A-2	63.172
1310206|F|0-60:C>T-60:C>T	TGCAGCTCGAGGATGCAGGGCCGACTGCTTTGTCTATTCGGGGCCAGCGGTTTGACGAGGCGGCGCGTT	4A-2	63.289
1131500|F|0-16:G>C-16:G>C	TGCAGCTGCTCTTCCTGCGCGTCACCTTCCTCGCTGAGCCCCGTGGCGTGGCCCTTCTCCG	4A-2	63.497
2254617|F|0-22:T>C-22:T>C	TGCAGGTCGCCTGCTGCTGCTATGGACTAAATCGAACAGAAAAAGAAATCAGGGGTCCGATCCGATCTG	4A-2	63.664
1254428|F|0-44:C>T-44:C>T	TGCAGCTGCACCCGCTTGTTCTTGCCGATCACCCTGCTAGACGCCGCCG	4A-2	64.027
1243139|F|0-9:T>C-9:T>C	TGCAGAGCTTTTTTTTACTTCGCGTGTTACGAAAAAGGAAAAGAAACTCGCGTCGCGTCTGTTGGACCG	4A-2	64.429
4008207	TGCAGTCAGATCGAGATCAGGGAAAAGTGTCCG	4A-2	64.639
1095875|F|0-9:C>T-9:C>T	TGCAGCCGCCGCCGTCTTGCCGCTGTGCTGCGCCCCACCTTCATGGACGCCGCGCCCCGCCTCGCCGCC	4A-2	65.167
1013844|F|0-62:T>C-62:T>C	TGCAGCCGCTGCCGTCTTGCCGCTGTGCTGCGCCCCACCTTCATGGCCGCCGCGCCCCGCCTTGCCGCC	4A-2	65.178
982703	TGCAGACTATTCTGTGTGCGCCTTCTCCCTCGCGTTGCCAGCTTTTTATTACCGCTGGATACAGCCGAG	4A-2	65.863
3533573	TGCAGCAGCGCCCATGGGAGCCGACCTCCAAGGCCATCGCCG	4A-2	66.051
1097793|F|0-30:G>A-30:G>A	TGCAGCAACTCCTGCGCGTGCACTGTAGCCGTGCCACGTGGCAGCACGTGATTGGCTGGAGGACCTCCT	4A-2	66.216
1032566|F|0-37:C>T-37:C>T	TGCAGAAAATAAATCAAAGAACTATATCATATCACATCCCGTTACTCCATTCTTCCTTCCATCAAAAGA	4A-2	67.129
3936718|F|0-23:C>T-23:C>T	TGCAGACATCTTTGGTTGGGCCGCGGTCCGCGCGGTGTAGCCACCG	4A-2	70.709
1099583	TGCAGAGGTCTGAGGCATGGCGCATGGAGTCTGTCCTCTCAATTCAGACAGCACGAATAAATTTCCGAG	4A-2	71.593
980421|F|0-7:C>G-7:C>G	TGCAGGACGAGGACAACCACCAGGTCTTCCTCCATGAGCTGCACCCCATCCTCGCCCACCACCTGCACA	4A-2	71.905
1108640	TGCAGGAACCAATGATGCACCTTGACGGTGAGGTGCGGGAAGCAGTCCACAAATTTGCCGAGCCGAGAT	4A-2	72.971
3946217|F|0-49:G>C-49:G>C	TGCAGATTCCACTTGTTCCTACTAGATCACTCCTGTTTCTCCCTTCACAGAAGCATCATAACCG	4A-2	73.944
1001988|F|0-20:C>G-20:C>G	TGCAGTTGGCAAGGGCGGCGCTGGCGAGTGGAGGAGCGGATTGGGCGGCGGCGCCG	4A-2	74.593
1081114|F|0-24:C>G-24:C>G	TGCAGACGTAGACGATTTTGCAGTCGGCCAAGGAGGGTGGCAGCAGGGAGTGGTGCATGTGCGTGTGCA	4A-2	75.232
7169596	TGCAGCTGGCGTTGCAACGGCGAGCGGTGGCATCCCCG	4A-2	76.072
5324598|F|0-46:G>C-46:G>C	TGCAGCTGCGCGAGCGGATGCTGCACTTCTCGGCCGACTCGCTGGCGGCGCTCAAGGAGCGCGCGCGGG	4A-2	77.879
21743427	TGCAGCGGCCGCTCACAGCAAAGCCCACTTGGAGCGAGGCGCTGCGCGTGTTCGTTGCGTATCTCACCG	4A-2	77.962
4262535	TGCAGAAATTGAGCCGTGTCCTAACATCGACGGTCCACGCCGAACTTGCAGGCATCAGTACCGATCTGC	4A-2	78.707
7488511	TGCAGTGGATGATGAGCTCGGGTCGTCCG	4A-2	78.911
1062264	TGCAGATCATGTTTGTTAGTGGATGAGAAGTAGTACCAAACAAATCAGAATCCCAGGACTCCG	4A-2	80.346
3534447|F|0-8:G>A-8:G>A	TGCAGCAGGTGGCAACAAGCACGTACCTAAACTTCTTATCACTTGACCG	4A-2	83.405
6041825|F|0-6:T>G-6:T>G	TGCAGGTGTCCATCCTCCATCATCGGCGGTGTTGGAGAGCTCTCAAAGCCG	4A-2	85.456
4537733	TGCAGCAGCAGCTTGCGGAGGATCTACAGCAGCTCCAGCGGTCGCCACACCTGAATGAGACCG	4A-2	89.315
1668040|F|0-43:A>G-43:A>G	TGCAGGCCCTATCCATGGCGTCCCTTCTTCCCCACGCGCGACCACACCTCGACCTCTGCCGCCG	4A-2	90.381
1002395|F|0-38:G>A-38:G>A	TGCAGGATTCAGGATAGATAGCCGCCACCGACCGCATAGTGGGTGCTGCCG	4A-2	98.097
7939401	TGCAGAGCAAGAACCTGCATCACCATCGCCG	4B	0
3025629	TGCAGAATGTCCTCGTCTTCCAGTGGAGGTGCCGTCGCCG	4B	5.699
1685894|F|0-12:A>C-12:A>C	TGCAGTTTGCATATCCCGGACGCACAAGCAAGAGCAACTTTTGAACTACATTGCATTTTCGCACGTGGC	4B	12.607
3950156	TGCAGTCAACAGGTGATGATGTTCTGATTACCG	4B	17.816
3064433|F|0-16:C>A-16:C>A	TGCAGAGCCCAAGCCCCACGACCAGATAGATTCCCAGGCCCACCCG	4B	19.095
981879	TGCAGGCTTGCACTGCACGTACCCCTGATGAGAAACTAGTAAACAAATTAAGCTAGGGAACAAGCAAGC	4B	22.634
6042034	TGCAGTTCATCCCTGTAAATAACCCTGGAGCCG	4B	25.967
3944616	TGCAGTACTGCCAGCGTCGCTCGCCCTAGAGGTACGTCCCG	4B	29.386
4993827	TGCAGCTACAGGACCACGCCTTCGCCAACCG	4B	30.23
6038169	TGCAGGTATGCCCTGTTTGCTTTGCTGAAGTTCCCG	4B	30.47
7343475|F|0-16:C>T-16:C>T	TGCAGGAGGAGCTCCTCGGCCG	4B	31.509
1111696|F|0-7:C>A-7:C>A	TGCAGTCCGATACCGGGGACTTCTGCGTCTCGCTCTTCGGGTGCAGCAAGGATGACAGTATTGGCGTCC	4B	33.887
3937428	TGCAGGTGGAGCATCCATTGCCGCAGCAGTACATCCATCTTTTCGAGGACGGGCAGTTCACCACATCCC	4B	35.15
4992872	TGCAGGTTCCGCGGACGGTGATATCGTCCG	4B	39.529
4909781|F|0-29:C>A-29:C>A	TGCAGTAACTCAAATGTCGCATGTGGCTGCTGTAGCGGTAGCCGAGGCGAGACGATACACCAAGGTATC	4B	42.589
1150955	TGCAGGCAGAGGAGGCAGTAGGCGGACATGCCGAGGAAGCTGAGCCGCGGGACGCCGAGGCTCATGGCT	4B	43.679
1146153	TGCAGGAGTTTCGATCTGCTGAGTAACCAATCTTCAGTTTCTGGATCCATTCATGGTGTGTCACGCACC	4B	44.199
1132999	TGCAGCTGATGGATCGTGTTACCACCGCCAAGCGAGGAGGATGCCCCCTGGTATCCGTAGACGGGAGAA	4B	45.497
3958866	TGCAGGATGCCGTGCCGCGCCAGCAGGGCCTCGGACGCGAACCCG	4B	46.52
1121076	TGCAGATGCCGCGGCCGTCCTCCCCTTCGCCGTTGCTGCCCTAGCGTTGGCCCCG	4B	47.353
4990289	TGCAGCTTCACTTGTTGAACCCTGCTGCACTCCG	4B	48.077
2276991	TGCAGGGCAGATATCATCGATAACAAACAACATCGCGCACCGTTTGACGGAGCGAGCGAGCCG	4B	48.115
5324421	TGCAGCCGACTCGCCTTTGCCG	4B	50.943
1094306	TGCAGCACGGCGAAGAGCGAGCGCCTCAGCCAACTCCGTGGACGAGACTCCCG	4B	51.35
3533706	TGCAGCGGCGAATCCAGCAGCATCAGGTCACGTTGCAGCCG	4B	52.075
3938128	TGCAGTTTCAGAGCGACGAGAGAGTGCGACACCACCG	4B	52.134
3022528	TGCAGTAGACATGTCCAAGCAGTACTACCGCTTTGGACACCG	4B	52.83
1028824	TGCAGCATCCCGTCGCTCATACCCACCGACGGTGGCGGGCATGGTACTGCACGGCTTGCCCACTGTCTC	4B	53.943
1012604	TGCAGCCGCCACCACCGCGTCAGGCGAGGAGCTGTATGCGTCCCTGCTCTCGCGCCTGGTGGCGGAGCC	4B	57.031
1863994|F|0-40:A>G-40:A>G	TGCAGGAGTCGTAGCCAGCCTTGCTGACCTCGACCACATCATGCGCCGCGGGGGAGTACTTGAAGATGA	4B	58.159
1132777|F|0-49:G>A-49:G>A	TGCAGCTCTCACCTTTGCTTGCAGATGCATATGCAGATGGCCAATCTCGGCCGTCCG	4B	59.406
4909943|F|0-10:A>G-10:A>G	TGCAGGAAGAACACCTCGTGGGTGTCCG	4B	59.406
1203546	TGCAGCTAGATGGGCTTGCCTTCAAGGTGGTCAGGCTTGAGCTAGGTCAGATCAACCGCCG	4B	59.538
2294704	TGCAGCATCGACGGCGCCATCAACACCTTCAAATCTGGCAACGACGTCATCCCCCTCAGCGCCACCGAG	4B	59.807
1105545|F|0-37:A>G-37:A>G	TGCAGCGCCAAATAGGAAATGCCCGAATAACACCCTCACGCAGTTCTTTTGCAGGGTAAACATAAAAAA	4B	61.01
2291372	TGCAGACGCTGGACCACAGACCGCAACGGGAACCCAAAAAAGGCAGTCGAAGAAGAAGGGGACATCAAG	4B	64.834
7865040|F|0-11:C>G-11:C>G	TGCAGCTTCCTCGCGCGCTCGGTTTCACTCCACCCG	4B	68.583
4988954|F|0-40:T>G-40:T>G	TGCAGTGGAGGATGAGGGCCAGACGGGGTATGGCGGCAGATGCGGCGGCGATTTCCG	4B	68.957
1107781|F|0-5:C>T-5:C>T	TGCAGCCGTCCGCCATGACCCGCGTGAGGTCTCCTACGTTGGGGACACCGCCACCG	4B	70.65
1056645|F|0-16:G>A-16:G>A	TGCAGGGTGAAATTAAGGCACTGCTAGCTGCTAGTACGAAACAAGATGCATGTTCAGCGTTAGTTGGAG	4B	71.625
1235063|F|0-19:G>T-19:G>T	TGCAGAAACTTTTCACGCTGAAGAGCCCCTTTCACACGCGCCGCTATATTATTTGCGCTTCGTAGCTTT	4B	73.95
987732	TGCAGAACTGCTCGGCGACCAGGTACTGGTCACGTATCACCACCACGAGGGCGCCTTAGAGAGTGCACC	4B	74.894
1241067	TGCAGGAAACCGCGTAGGTTGGCATAATTTTTTGAAGCTCTATATAAGCAACCCCGACGGTCCG	4B	76.13
1209504|F|0-44:G>A-44:G>A	TGCAGGAAACCGCGTAGGCGTAGCTTGAAATCACTGTAAGCTCTGTATAAGCCACCCCG	4B	76.662
1248218|F|0-6:C>T-6:C>T	TGCAGACGATGCTCTTAGACGACGCATGACACCAGCTAGCTGTCCCCGCGCCCGTCCG	4B	78.908
3943254	TGCAGTTCGCCATGAACCATGGTCCGTGGACCCG	4B	79.036
5581532|F|0-26:C>G-26:C>G	TGCAGGTACGGCAGCGCCGGCAGGGACGACTCGGCGACCG	4B	79.657
1082537|F|0-55:C>T-55:C>T	TGCAGCCACGTCCACTGCGGCGTGTACTTGCCGTAGGCGGAGTAGGAGGAGAGCACGATCACGTGCGCC	4B	81.052
7343164|F|0-44:G>T-44:G>T	TGCAGATTGTTTGCTTCGTTCTCCCCTCTCTTGATCCTCATGTCGAACTCAACCAGCTGCTTGACATAC	4B	81.801
3021596	TGCAGTTTCACCATCTCATATATGTCACTTGTCGACCG	4B	82.358
3958039	TGCAGTCTGCGCCGCCGTGCTAGTTCTGTTGCTGCTCGCCG	4B	82.519
1215714	TGCAGGGCTTTAGCCGTTGCCTTCAGCTTGTTGTGTAGTGTAAGATAGACCG	4B	82.771
1053232	TGCAGAAAAGCAAACACTAGTAGGGAATAATGGCCAACCAAGAAAGGAAGAGATTAATTGCATTCTTCA	4B	83.281
1068795	TGCAGGAGGCAATGGTGCCCTGATGTTCCAGGTGAACATGAGGAGGACGCCGCGAAGAAAAGCATCCGA	4B	83.683
4009211|F|0-20:A>C-20:A>C	TGCAGGCGAGTCGTGTGGTAAGGCTCGATGCGAGCGGCACATAGCCGCGCCTGGGCACACAACGGCCTT	4B	84.319
5332319	TGCAGGCCTGGGACCTCGAGCCG	4B	84.89
1203145	TGCAGCAGCTGGGAGTGGGAGTGGAACCTGGCGCAGGCCGCGCGGAGGATGGCTGCCGCTGCCG	4B	88.249
4989257	TGCAGCGGGAGAGCGGCCAGGTCAACTCAGGCCG	4B	89.11
4541304	TGCAGCACAGGGTCGCCGACGACCCGCCCCG	4B	90.563
3025431|F|0-20:A>C-20:A>C	TGCAGGTAGCGAACAAAATGATCCCCTTCAATCGGCCG	4B	92.576
4393739|F|0-20:A>C-20:A>C	TGCAGGTAGCGAACAAAATGATCCCCTTCAATCGGCCGGCCGCGCCG	4B	92.964
5577968	TGCAGCCTCCCCACGGCGACGTACAACGGCCG	4B	93.747
1210966|F|0-43:A>G-43:A>G	TGCAGCTGGGAAGGCGTGACGTGCAGCCATCGGAGGCCGGCGCAGGTGGTGGCGTTGATATTGAACGGC	4B	94.379
4010019	TGCAGGCGCGGGCAGTTAGGGATCAAGACCCCGAGGTCGACGTTGCAGCCG	4B	96.283
4993374|F|0-17:G>A-17:G>A	TGCAGGCGCGGGCAGTTGGGGATCAAGACCCCGAGGTCGACGTTGCAGCCG	4B	96.668
1694976|F|0-23:A>G-23:A>G	TGCAGCACGGCGTCGACGGAGTTAAGGGAGATGTTGAGCAGCTTGTGTCCG	4B	97.133
1252814	TGCAGGGGCAGCTCCTGTTCCATGGCGACCACGGCAGATCCTGGCCGCCGACCAATCCGCCG	4B	97.156
4004834	TGCAGTACCCGATGAGCGACACCAGGTGCGGGTGCCG	4B	98.252
1112402|F|0-37:C>T-37:C>T	TGCAGCAATTCGTGTGCATGTGTGCAGCCCTTCCCCTCCCCCTTCTCTAGTCTGGTGCTTGGATTCTTC	4B	98.371
4393960|F|0-6:T>C-6:T>C	TGCAGCTGTGAGAGGCTCGCTGGGATGGCGCCCCTGAGTTGGTTGGCGCTGAGGTCGAGCGCGGTCAGA	4B	99.509
1111526|F|0-7:A>G-7:A>G	TGCAGCCACAGAGAAGACCACGACGGCCACAAATTCGCGCACGCGCCATGCTGGGCCG	4B	103.343
3532930	TGCAGATCAAGTAAAGATCAGAGAAAATCATAAAAGAGTAAGATCCG	4B	106.555
3937170	TGCAGATAACTTGTTAGTTCTCCTAGTCCG	4B	107.276
1038350	TGCAGGTGCTGTTTCCGTTCCCGAACGAGACAGCCGATGGGCGACGACGTGCTCCGCCGTGCCTCTGTC	4B	108.032
1133136|F|0-13:G>C-13:G>C	TGCAGGCGAGGATGGACGATGTTGCCGGCCTTGTCGGCCTTGAGGTATTGTCCG	4B	108.805
5411293	TGCAGTGGGAGCACGCTTGCCGTCACGGGCCGTGACAACGTCTTGGCTCCG	4B	109.159
1160733	TGCAGCTGCCAGCCTAGCAGGACCACAGCGGTCTGCAACGCCCGCAGCGGCGCACCG	4B	109.46
1129203|F|0-42:T>C-42:T>C	TGCAGTCCTTGTCCACGCTGCGGCTCAGGGACTGCGGCGTCTTAGGTGCAATACCGTCGCCCATTCAGA	4B	109.567
1091690|F|0-7:T>G-7:T>G	TGCAGAGTACGCTGGACTACGCGTGCGGCCACGGGGCCGACTGCGCCCCGCTGCTCCCCG	4B	109.751
4992771	TGCAGGCGGCGGCGGCGTCGTGACACCG	4B	109.772
3026342|F|0-23:C>G-23:C>G	TGCAGCGCCTCGACCTTCCGCCCCAGCATGCACGCCCG	4B	109.898
1236727|F|0-24:C>T-24:C>T	TGCAGCGGCATTTCCTAACGGGCGCCTTAAGGGGAGCTCCTATACGGCGCATTAAGCGCCG	4B	110.396
4990850|F|0-13:G>C-13:G>C	TGCAGGCGAGGATGGACGATGTTGCCG	4B	110.535
1133705	TGCAGGTCGGCGGTGAGGCCGTTCACCCGCTTCACGTCGGCCACCTGCGAGCCAGACCGACGAACGGAT	4B	110.82
1132850|F|0-28:A>G-28:A>G	TGCAGGCACAAGAGGAGGAGCGGGGGCGACAAATTTGCAGAAGCGGCGCCG	4B	111.848
5350018	TGCAGAATTGAGGTATGTTCCTTGCCTTTGACCCG	4B	112.624
2245409|F|0-68:C>T-68:C>T	TGCAGAGCCATATGGGAATGAGTCGAAGGATGCATTTCACTTGCTCCACTTGGGTGACCGTGTAGAGAC	4B	113.15
3948569	TGCAGGCCAGGGTTGGGGTTGTCGCCG	4D	0
2244432|F|0-53:A>G-53:A>G	TGCAGGCTACATCCCGTGTTGTCAATTCGCAGCTGGTCGAACACGTCTTTCACATCCG	4D	3.311
1130041	TGCAGCAGCGGTAGTATTCGTCGCCGTCGCCACAGCCGCCGTCTCCAGCGCCG	4D	3.895
2322224	TGCAGTCCCGCTGCTGGCTGTGGTGCATGGCCTGGAAGAGGTCGATCTGCGGGCTGATGTTGCGCTGGA	4D	6.647
1100901	TGCAGTGGAGTAATTTTCATCAGCAGGAAATCAAAGCGCGACAGGCCCATCAGCCCG	4D	7.794
2242100|F|0-24:C>T-24:C>T	TGCAGATTTATGTAGGAGGGGTGGCGGCCTGCACTGTGTTAGTTTATACTAATGCGTCGAACTTCTCGG	4D	9.724
4543483	TGCAGGCTTTCCGAGCGGGCCCAGATGCCCG	4D	11.712
3942814	TGCAGCTGGGCAGGGTGTTTGACTGGTAAAAAGGACCAACACCCCG	4D	13.072
1217469	TGCAGGGATAGAGCCGACAAGATTGTTGCTGAAGAGATACAGGATTTGCAGCTTGGCTGCCTTGCCGAG	4D	15.294
1121027	TGCAGACAGAAAGGTGCTGCGTGCAGTAATGACTTTGCGTCTTCCACCACTCAACCATATGTGAATGCC	4D	15.298
1102177|F|0-23:G>T-23:G>T	TGCAGCGTCAAATAGGATTTGCCGATATCTCTCCCGTCGGGGAACCCCAGATGGCCCG	4D	21.733
1098475	TGCAGTCGGAGGTCTTCCCGAGCCAGGAGTATGAGCCGCCGAGCAATGCCG	4D	24.103
4910613	TGCAGCATGGGAGACGGCAGGGCATCGTCTACTACCG	4D	29.043
4539293	TGCAGCTGCCTGGACTCGCTTCTCTGGTTGCCG	4D	29.162
1103640	TGCAGAACACCACCGATGATATGCGAAAGACAAAGCATTCGTAAGTGCTCCAGATCTGATGCCG	4D	34.016
1141680	TGCAGAGCCAGGTGCATGCTTCAGATAACGGCCGCCCCCGATCCATGTTACATTGAGCACCG	4D	37.423
4992109	TGCAGGCACACGGGAGGTAACCGCCAGAGCCG	4D	37.676
3027223	TGCAGTCCTCGACCTGCGCGGCCAGACAAAGTCGCCCCG	4D	43.937
1099368	TGCAGAAATTATCAGCAAATCCATCCACGACTGACGCAGAGGATGACGAAGAACAGGAACCACAGTCCG	4D	47.685
1714669	TGCAGCTACGCGGTGCTCATGGACTCGTCCAACTTCACCTTCTCGACGACCTATGCGACCTCGCCGAGA	4D	51.99
4537728	TGCAGGATCATAGAACTATAGAGGACCG	4D	53.125
1000023	TGCAGTCGCTGGCGTGTGGATCCGCTCGCGGGTGGGCCGCGTTTGTCAATGACCGTGGCTTGGATATGG	4D	55.575
5328849	TGCAGCCACGCGCTCGCCTCCTACGCCCTGCTCCTCCGCCGCGACCGCAGCCTCGCTCTGCTCGCGTCG	4D	58.23
1101297	TGCAGCACCTTGGCAACAAATTTGCACATCATGGCTTTCTTGTGAGCATAGATATCCCTCACGCCAAGT	4D	60.148
3026883	TGCAGTCAACTGTCGATGCATGAAACCACGACAGACCCG	4D	62.051
3938889	TGCAGTCAATGGGCCAGTGCCCTCCACCG	4D	65.156
1253660	TGCAGGGAGAACGAGCAGCGGCGGTCGGAGGAGCAACCTGAGCTGGTGGGGGGCCG	4D	67.39
4993134	TGCAGCATGCATGCAAAGCTCGCGGGCCG	4D	69.745
4990705	TGCAGACATGGGCTCCGATCTGAAGCTCCCG	4D	71.176
1382821	TGCAGGGGCGCGTCACAGGGCACCAGACAGCTCGGAGAGCAGCAGAAGCAGGGGCGACCCG	4D	76.716
1040605	TGCAGAGACTTAAGGGTCACATTACTGACATGTGCATAGCCATCTTTGGTAAGGATAACTTTCTTCACA	4D	79.02
6037441	TGCAGAATCAGAGAAGTTGCAACCGCCG	4D	80.738
3023774	TGCAGGCTTTTATGAGAGGCTTTTCTCGTCAGATGGGTCTACCG	4D	81.38
3022106	TGCAGCAGACTCCTCCTCAACAGAATCTACGCCAGTCCG	4D	82.185
4993145	TGCAGCCCTTGGCAGCCCGTGGAGGCCACTGCGGGGTGCTGGCGCCG	4D	83.074
7488097	TGCAGCTGAAAGTAGCACTGGAGGTGGTGCCCG	4D	83.621
3943178	TGCAGTGTATGGGGATAAGGGATATTCCG	4D	84.253
1237229	TGCAGCTGGTGGGCGCCGCCGTGACCACGACGACCACGACCAAGGCGAAGGCCG	4D	84.886
1107261	TGCAGAGCAACAACAAAAATAAATGGTCATGGGGATGTTGCTGTTACTGCTGCCG	4D	85.279
4990366	TGCAGCAATGCGTTGGAGATGCCG	4D	86.897
4543041	TGCAGGGCTTCGCCTGACTGCTTCCTCCG	4D	90.252
1290450	TGCAGTTCATCAGGATTTGCATGCTGAAGCAGGACAAAGTTGCTGCTAGATTCGCCATCACCG	4D	93.169
3959738	TGCAGCTGCGCCAAACCACTGTTGATGTGGATTCAACCACTGCTCCG	4D	96.435
1102564	TGCAGGGGGAGGCGTGCACGCACCACGCGCCAGTGGGCTTGGACTGTCGCCAGTTCCGCGTTGCTCGCC	4D	98.283
1023076	TGCAGCAACTCCGTTGGCGCAAATCATGCTTGGACAGGAGCAAGCTGCCCAAGCGTTAGGAGTTGAAGT	4D	105.375
3943480	TGCAGCGCAGCACCGACAACGCCG	4D	107.448
4541366	TGCAGAATCACCATGTCATGCTCCTGGCCG	4D	114.973
4004624	TGCAGCAACACCAGCAATGGTCAAATCTGCCACAGCCG	4D	116.911
1132102	TGCAGGGTCGGCCGACGCCACTGTTGCAAGCCGGATGCTTGATGCTGCATGGCCG	4D	118.363
2294370	TGCAGTCCATCGAATTAAGTCTGATCAGATGGTCTTCGAGGCGATCCACGCGCGCAAGAGATGAGCCGA	4D	119.352
3021332	TGCAGGGATCACACATGCTTGTTATTCATCAACATTCCCG	4D	128.92
976946	TGCAGTATTGTTCGGCGATTTGAATTAGTCCTCGTGTTCGGGCCCAGCGTCCG	5A	0
987136	TGCAGCGGTGGTACAGGAAGTGGCATCACGTGATTGGGTTTCAACTATTAGCTAGCCGATGCCTTAGGA	5A	3.146
992301	TGCAGCGATGCCCGTTCGCCAGCAGCTGTGGCACTACGGTGGGAACGTGGATCCATGGTGGGAAGGCAG	5A	11.576
1004831	TGCAGCGGCGTCGGTGGGAAGAGCATGTCGGCGGTTGGGGTGGCGTACTCCTCGGACGTGGCCTCGTAG	5A	16.554
1020403	TGCAGCCATTGTGCTGCTACTCGGTGGCTGCCTGGTGCCCCCAACGTCGTCTCCTTCCCTCATGAGGCG	5A	17.207
1054105	TGCAGCACTGTTATTCTTCAACAGGGTGAATAATTTTAGTACCATCCATCCACAGAATGACCG	5A	17.207
1081724	TGCAGTGTGGGGTGGTCCACTTTGGTCACCACCACGGGCCACGGTGGCCG	5A	17.52
1088200	TGCAGCACAGCAGATGTGCATTTCATATACTCTGAATCGTGGAGCACGCCCACTGTTCCG	5A	18.115
1089517	TGCAGGACGCTGCACCCCTCGGAAGGAATCAGAATACGCTTCCCTCGCGCGAACGCGGACACGCTGCTC	5A	18.507
1090538	TGCAGAGGAAAGCGACATGGCACCCAGGTGGAGGCAGGCGCGGAGTCCAACATGGGCAGGCCG	5A	19.512
1092541	TGCAGTAGCAGTTTTGCAGAGGCAATCGTCGGGAACTGGCGCAGCGCCTCCCAGCAAAGGCGGCAAGCC	5A	20.695
1099530	TGCAGACATTCATGCATTGAAAAAACACAGTTGACACTTGACAGTGAAGGGCCG	5A	21.012
1100393	TGCAGTAGGAGGAGTAGGAGTGAGCGACGCACGTCCAACATACAGTGCATGTCGCATGCACCG	5A	21.898
1108615	TGCAGGTTGGACAATAGAGCACTGACTTCAAGGCGTGTGTGGTGGAGAGCGGCAAGAAAGAAGCAGATC	5A	23.899
1110307	TGCAGGAGAATGAGTTGCCTCCAGTTTCTCTAGTGCGTCCCAATGATCCG	5A	27.1
1113985	TGCAGTAGCAGTTTTGCAGAGGCAATCGTCGCGAACTGGCGCAGCGCCTCCCAGCAAAGGCGGCAAACC	5A	28.735
1115255	TGCAGTGCGTGTTCCCGACGCCATTGCCGACCGTCGGTGCGCCACCGTGCCG	5A	29.239
1126439	TGCAGGTCAGCGTCGCCGTCGCGGAGGAGGGATTCGCCGTCGCGGTCAGGTCACGACTGCCG	5A	32.09
1132489	TGCAGTGGACGCTGTTTCCGGTCAGGCTGCGGCGAACTCTATAGTCAGGGAGGCCACCG	5A	33.054
1132797	TGCAGCAGTGAACACCCCTGCGGAGGAGACGGTGGAGACCTCGGCCAGGAGTATGGCCG	5A	34.199
1159308	TGCAGTCAGAGGGAGAAAATGGGCCGCCCAACCCAACTATCGCGACAACGACCCG	5A	35.033
1209154	TGCAGCAGCGCGACCTTCAATTTTCAAGCTTGCATGAGTCTCTCTCTCCTGGCCGTCGTTGTTCAATCC	5A	35.717
1241780	TGCAGCTCTCCTGCCAGTCTTCTGCTTCTTCTTCTTCTGCTGCTGCTGAGCGTGTCGCCG	5A	36.313
1252666	TGCAGCAGGAGTTCACCACCTTGATTGTCACTCTCTGGGTAATTTGGTATGCTCGCCG	5A	36.926
1261004	TGCAGATCGCCATCCGACTCGTCAGAAAGTGTGATCTTCTTCGGCTGGGCCAGCTGGCCAGCAGGGCCG	5A	36.934
1262290	TGCAGATCGACCACAACGGCTTGCCGCTGCATACGTACGTACGTGGCGCAGTGCATCTAGCGTCACATC	5A	37.168
1283852	TGCAGGCACCTACTGCACGACGCATCCACGGGGAGGGTGCGACCAAGGGTAGCGTACATCCG	5A	37.473
1295856	TGCAGCGATGCCCGTTCACCAGCAGCTATGGCACTACGGTGGGAACGTGGATCCATGGTGGGAAGGCAG	5A	37.873
1379039	TGCAGTTGTTGCGGTGCGGGGGTTACCAGCGGAGCGGGACGGCTTGCGGTAGTGCGTGAGCCG	5A	38.89
1672328	TGCAGATGGTGTGATCTGGGGTTGGCTTTCCATTTATTCCTCGATCGCACCG	5A	42.015
1688383	TGCAGCGCGAGCACTTGGCCAAACCCCACCTACCGCCGCTGGCCGTCCCAAGCACATCCG	5A	42.634
1712553	TGCAGGTTCTTTGTTACTTCAGTTTGGTATGGCCACCACTGTGTCAATTTTGCTCCATCGATTTTTTTT	5A	44.156
1714015	TGCAGTGTCTGCGTAATATATCTGTCGAGTGCGCAGGAGCACGTACGGAAATGTCCG	5A	44.718
2275923	TGCAGCCCTACGAACGAGGAACAAAAACATTCTGCAAAACGCTCGATCCGTCGTCCCACCG	5A	45.386
2276210	TGCAGTCACCCCACTCGACCGATCGAATCTAGATCACCACCACCAAGCCGTCCAGATCTGAATTGAGCA	5A	46.048
2277628	TGCAGCGCGCCAGCCCCGATGGCGAAAAAATGATCAGCTTCGACGTTAAGACCCG	5A	46.795
2278609	TGCAGGCCGATAGGTACACATGGGCGTCGATGCAGGTCGATCGAGGGTAGGCGCGCAGGGCCG	5A	47.208
2303630	TGCAGTTGGCACTTTTGGTCGAGCTCACGGGTTCATCGTCACGGGTTCACGGGATTTTTTTCGATCCCC	5A	47.761
2326786	TGCAGCAGGCGATGGATCGACGGTGATAGCTTGCCGCGCTTCCATGTGCGCCGTACGTATCGGCATCGC	5A	48.147
2328689	TGCAGCCTCTCTCTCTCTCAGGCCATGGCGCTCGAGCTCCACCTCCTCGTCCCCATGCCCGCTACAGCA	5A	48.473
3024552	TGCAGATTAGAACCTCACAAGGGAACATCGTGCACCAGCCACCG	5A	49.098
3025787	TGCAGATGCACCGTCCCCGAGTCAACGCGCTGCACACGTAGCTCCG	5A	49.852
3028129	TGCAGGATGCGTGTTCATGCGGCAGAGCTGATTGGTGCTGTCCTACCG	5A	50.091
3064750	TGCAGCACACGGCGTACATATACTACGGCGACTCCACCATCAACCG	5A	52.14
3384817	TGCAGATGTGCATTGAACCAACCGTCATTCCCAGCCG	5A	56.948
3534205	TGCAGCTAGCGCCAAAATAACTCCGTTCTCTTGTTCATTGTATGTGCCG	5A	57.274
3571376	TGCAGGGAGGGATCCATAGTATAGAGTACCGTAGCAGCTCCG	5A	59.398
3572443	TGCAGGTGAAGACGGAGGAGGGGATGGTCAGGAAGCCG	5A	59.944
3936363	TGCAGTTCTGATGATTAGGTCGACACGAACCG	5A	62.306
3942612	TGCAGCAGGAGTTAATGCGAGTGAATATGAGTATCTTTTCGCAATGACAGATGGCACCTTGACTCCGAG	5A	64.692
3951179	TGCAGCGGGGCCTGCCTCGCCCTTTCCCACGGTCAACCG	5A	67.474
3958880	TGCAGGAGTAGCGGTGGCGGCGCCATCGTCTCCCTTGTCATTTCCG	5A	70.312
4003063	TGCAGGACAAAAGGCTGCCCGAATGGTATCCG	5A	72.255
4003847	TGCAGCAACTGGAAGACGAAGAGCTCGGCGGCCTGGACTCGCCG	5A	74.151
4003881	TGCAGTCCGTCCAGATGGACAGATCGTTCAGCCTCCG	5A	75.377
4005374	TGCAGACTATAACTGAAGCCGACATTCGGAAGAGGCCGCTGTGGCACACGTACCCG	5A	76.028
4009778	TGCAGCGCCACCGCTGCTGTCTCGCGCGCTCGCTGGCGCCACATCCG	5A	77.463
4010136	TGCAGGGGGCACGTCGGGATCGTAGGGCGCCGCCG	5A	80.285
4261603	TGCAGTCCTCAGGGCCACGTCGCCG	5A	80.952
4261703	TGCAGATTCGTCTGACACGCTCCG	5A	84.236
4394579	TGCAGGAGCGTTTCCGTGTGGCACCG	5A	84.5
4406313	TGCAGTGGAGATCTGGACTTCTACGGAGCCG	5A	85.019
4439966	TGCAGATTAGCGAGACCGTCGACAAGCGCGCCG	5A	86.766
4663813	TGCAGCAAATCAAAGGGACCATCCG	5A	87.327
4992364	TGCAGTCGTCTGATATCAAAATAAAAGGACCG	5A	88.956
4992792	TGCAGAAGCTCGCCTCGCGAGGCGGCGGTCTCCG	5A	90.082
4993136	TGCAGTAGGTTGTCGTCGGAGCCG	5A	90.379
4993281	TGCAGGCGGAACAATAGTACAATTTGGAGCTCCG	5A	91.182
4996343	TGCAGCTCGAGGGTGTCCCCGCGGCTGGCCGTCACCCCTCGCCG	5A	91.388
5011550	TGCAGGGACGCAGCAAGGAGCGGGAGCGCGGCGGCCG	5A	96.687
5328644	TGCAGGCACCTACTGCACGACGCATTCCATGGGGAGGGTGCGACCAAGGGTAGCGTACATCCG	5A	97.273
5332908	TGCAGCATGTCATGGCCAGGGCGGCCGTCGGCGCGCGGCGCCG	5A	97.97
5333000	TGCAGGCGGGCGGGGAGCCGTCGGCCG	5A	99.951
5333028	TGCAGGTCGCCGCCCTTCGCCGCGGGAGAGCCG	5A	100.204
5346484	TGCAGGCGACTGTCTTGTCCCCG	5A	100.311
5360315	TGCAGCAGGGTTCGCCGCTGAACCGCCCG	5A	100.539
5363734	TGCAGGAGGCGCCCCACCGCGCCCG	5A	100.736
5364797	TGCAGCGCAGACGTCGCCCGTCGCCG	5A	101.424
5367274	TGCAGGATCTTTGTCTAGTTCAGTTTGTTCGTTCCG	5A	102.629
5563040	TGCAGGGCCAACTCGAGCCGACGGACGACGGAAGCTCAGAGGCAGGCGACGGGCTATTTTAATTGACCC	5A	102.831
5567401	TGCAGGTCCTGTGATGCAGGCGCCCGCCG	5A	103.13
5567420	TGCAGTACATGCCCCCCGCGTCGCTGCCGCCG	5A	103.564
5581384	TGCAGCGCAGGAAGGCACGGCCTGAGCCG	5A	104.726
7351659	TGCAGTTTCTCATAGAGCAAAGTCCGCTCTCAAGCCGCCCCATGTGACTCCGCAACCGAGTCACCCTGG	5A	106.109
7488402	TGCAGTGCAGCGCCATTGTTCAGATCTGGAGGAGATATCATGTGCCGTAAACAAGGGAAAGGAATCTCC	5A	107.618
7488418	TGCAGCCGCCCGCGCAGGGGCTCTGCCTCCG	5A	108.266
12697256	TGCAGCATTCGTCGTCGGATGTGTTTGAGGCATGCTGCCG	5A	108.551
12736957	TGCAGTCGGGGAAGCGCTTGGCATGAATGTCCAACCG	5A	109.247
21743469	TGCAGCGGCGTGTGGAAGCAGGAGGCCG	5A	109.433
1002325|F|0-62:A>G-62:A>G	TGCAGGCTGCGTCATCACGCGCGGCGCACACCGTGTAGTTAGCCACGCACGCGTCCCTATACACACCCG	5A	110.042
1013608|F|0-27:G>A-27:G>A	TGCAGCTTTCGCCGCCGAGGGTTTGCGGCTTTGATTGGCCCGAACGTGGGGGCGTGCGCGCCG	5A	110.362
1035056|F|0-12:G>A-12:G>A	TGCAGTTTCACGGAACATATACGCCCGCAAATCACTAATTAAGCAACGCCCGTGCTTACAAATGCCGTG	5A	110.597
1037130|F|0-56:G>A-56:G>A	TGCAGCCTGCGTCAGTGACAGGGAGATGATGTTTCAATACTCTGGGTTGGAGGGAGGGCGTGGACGTTG	5A	111.199
1051014|F|0-41:C>G-41:C>G	TGCAGACGGATGTAGAAGCAAATTTCGTGGTGAGCGTTGGACATGCCTTTGCATCCTGAAATGCTCTTC	5A	111.221
1067739|F|0-9:A>T-9:A>T	TGCAGGGAGATGGCTCCAAATTTCTGGCGACGACTAGATCTTTCGGGGAGCGACGGCGGCCTGATCTGC	5A	112.014
1072853|F|0-12:A>G-12:A>G	TGCAGGCCAGGGACGACGGATTAGGCGATTAGCACAGTAAACAAGGACTGATTCGCCACTACCAGCACG	5A	112.873
1079681|F|0-43:A>G-43:A>G	TGCAGAGAGCGGTTGTGTTGCACGGTAGACGTTGAAGGATCGCATGGAGGTATAAGTGTCTGTGTTGTA	5A	113.573
1081320|F|0-11:G>A-11:G>A	TGCAGTTTCTCGTAGAGCAAAGTCCGCTCTCAAGCCGCCCCATGTGACTCCGCAACCGAGTCGCCCTGG	5A	113.812
1081407|F|0-5:T>C-5:T>C	TGCAGTCTATGGCTCACTATTATGTGTGTGAAACACCAACCTTTTATCCG	5A	114.533
1094263|F|0-26:C>T-26:C>T	TGCAGGCAGGGGGTCGTGGAACGTCCCGACATGCGTTTTTTATCTGTCATTACCG	5A	117.791
1095135|F|0-52:G>C-52:G>C	TGCAGCAGCAGCGGCCGCACGATGCCATCGGAGGCAAGGAGGAGGAGGAGGAGAAGAAGGACCCCGACG	5A	119.861
1095162|F|0-40:C>A-40:C>A	TGCAGGCCGTTCCCGCAGCCGCCGCTCCTGCCCCTGCCGCCGCACCTCCAGGCCTCGCCGCAGCAGCGG	5A	120.396
1104805|F|0-27:G>C-27:G>C	TGCAGCAGGGCGTCCTCGTTGACGAAGGCCCACAGGAGGCCGAGCATGCCGCCGATCACCGTACCGAGA	5A	120.647
1178475|F|0-31:C>T-31:C>T	TGCAGAAGCTGCCCAAGCTTTGAGGGACCTCCCTCCACTGCTCCACAGCCTGGCTGGATCAGTGGAGCT	5A	121.168
1200982|F|0-30:C>G-30:C>G	TGCAGCCCGATCTTTTCTTGGAAGCTGCTGCCCATGTACGACGTGTAGTAGCTCGTGATGAGCTGCCAC	5A	121.858
1201600|F|0-16:G>T-16:G>T	TGCAGCTGCCGCCATGGAACTGAGCTTAGAGCTCCGCTGCTGCCTTGGTGCTGCTCTGCCCAACTCCTC	5A	122.309
1202759|F|0-52:A>C-52:A>C	TGCAGAGCAGCGGAAGGAACAGCACCTAGCTAGAACCATGGACACAAGACTTAACCG	5A	122.774
1206903|F|0-33:A>T-33:A>T	TGCAGGACGATCACGGAGCCCATCTCCAGCGACACGTCCGACGCGAGGATATCCCCGATTGGGCCCATC	5A	122.908
1208307|F|0-19:G>T-19:G>T	TGCAGCAGCAGTACGCCACGGCACTTCGCTGAGAACCCAAGCCAGGGCGCTTCTCCACTGGAAATCATC	5A	125.175
3064590|F|0-13:T>C-13:T>C	TGCAGAATCAGGTTGTCCACGTCGACGAATCGAACCTGGTGCTGGGCTTCCTCTTTCGCTTGGGCCTTG	5A	125.733
3064620|F|0-13:T>C-13:T>C	TGCAGGACGAACATCATGGCGCATGTTCAATCGACCG	5A	126.138
3222482|F|0-26:T>G-26:T>G	TGCAGAGGCAGAGAGGAGACATGCGATTCACCTGGGCAGACTACGCCG	5A	126.224
3949233|F|0-25:T>C-25:T>C	TGCAGTGGCGCCTGAGATGGAGTGGTCGTGCCCCG	5A	126.573
4005514|F|0-34:G>C-34:G>C	TGCAGCTCGAGGGTGTCCCCGCGGCTGGCCGTCAGTCCTCGCCG	5A	126.892
5325087|F|0-10:C>G-10:C>G	TGCAGATGGGCCACCTGTCAATCTTCTTGAGCGCGAGCTTCAAGCACGCACCATGGAAGACGTGGGCCC	5A	128.876
5374049|F|0-18:G>C-18:G>C	TGCAGGAGCGGGGGCGGCGCCG	5A	135.33
986361|F|0-27:A>G-27:A>G	TGCAGCGAGGTACGTCACGTGACTACGACCCCTTGCTTGCATACAGACTTTCCGAACCTCCG	5A	136.14
995229|F|0-51:T>G-51:T>G	TGCAGCAAGGAATAAACGAGGGTGACGCGACGATTGTATCACCGTTCGCGGTCTACGAGGCAGCCAAGA	5A	137.738
995502|F|0-8:C>T-8:C>T	TGCAGTGCCGTTCTGTTAAGTGCGACGAGATTACGGTCAGAAGTGTTCAGCAGTGCAATGACCCTCAGG	5A	140.43
1005618	TGCAGGACGAGGCAGCCGTCGTCGCCTCCTTCATGCTCGCCTCGGGCTCAGGGCGGATCTCCGCCAAGT	5B	0
3064914|F|0-34:A>G-34:A>G	TGCAGAACCTCTTCTGGAAGGCGGACGGCTGCTCATCGTGCTCCG	5B	0.083
2258574|F|0-10:T>G-10:T>G	TGCAGAGGAATCCAAGCTGTTACTTCAGTTTCTGAGGCAAGACCAAAGCATTGATAAATCGATATGTGA	5B	1.715
1094533|F|0-11:G>C-11:G>C	TGCAGGAACGCGCGCGGCGCCGCGTCCAGGCACGCGACGCGGTAGTCGCCGATGGAGCCCCG	5B	3.587
3943227|F|0-35:T>C-35:T>C	TGCAGCGTGCACCGCTACTCGGAGAAGCACGACTGTGCATTCGACTACAAGACCACCG	5B	4.958
1108889	TGCAGAAGGTGCCCTCGCAGCGGCATCGGAACCCCAGCAGCCCAACCTTCTTGCGGCACGCCGTGCACC	5B	6.076
1108889|F|0-11:C>G-11:C>G	TGCAGAAGGTGCCCTCGCAGCGGCATCGGAACCCCAGCAGCCCAACCTTCTTGCGGCACGCCGCGCACC	5B	7.062
1062230|F|0-44:T>C-44:T>C	TGCAGCAAAACAAGCAATAATTACATCATGCGGAATATTCTTCCTCAGGACCTCAGTACTCCCCAGTAC	5B	7.816
1116493	TGCAGTCTACGGTGTTTGGCTAGTTGATGAATGGAAGAACATGGTTTGACTTGACCTGCTTTAATTGGT	5B	8.879
11913949	TGCAGAACATCAATTTGCAGCTTCAGTATCCG	5B	9.067
1099391|F|0-35:T>C-35:T>C	TGCAGTAGTACGAGTATGTATTTGCGTTGGCACGATGAGGGACCTCGCCG	5B	9.772
2255863|F|0-44:G>T-44:G>T	TGCAGACCCGTCTCCGTTCTCCTCCGACTCTGACTCGAACTCAGGGGGAAACCTGCATGCTCGCAGCGA	5B	10.47
1102774	TGCAGGTCTTCTCAAAAGATGGATGTGCCTTGGGAAAGATGCAAGAGCCG	5B	10.488
4993673|F|0-7:G>A-7:G>A	TGCAGGCGAAGAGCTGCGCAGTCGACATCCTCGAGTGGCTTGTATCCCCG	5B	10.56
3941111	TGCAGTTGCGGTGCTCTGTCTTAACTGCACGTCGTACTATATCCCG	5B	11.307
4394721	TGCAGCCCACCGAACTCGAGGCTGACCCACCGCCCCG	5B	11.989
1077075|F|0-36:A>G-36:A>G	TGCAGAATCACGTTTACTTCTACCACATCTCTCTACATCCTGTGCAATTGGTGGTCGCTTGTACTTCTT	5B	12.438
1097102|F|0-27:A>G-27:A>G	TGCAGTAGACTCAGAGAAGGGTAAATTATGTGTATTACACAAAAACAATTTGCACCAGCCG	5B	13.241
1207474	TGCAGATTGTCTACGACAGCGGCCATGGATATTATCATCCTTCCAGGGCGCATCTCCCATCGCCGAGAT	5B	15.062
1207101	TGCAGACTAAAACCAGCTGAAGAAGCCAGCCGTGTTGCTAACAAGCATCCGATACGGTTCCCGTCCGAG	5B	16.103
1108889|F|0-67:C>A-67:C>A	TGCAGAAGGTGCCCTCGCAGCGGCATCGGAACCCCAGCAGCCCAACCTTCTTGCGGCACGCCGCGCACC	5B	17.5
1083332|F|0-27:A>G-27:A>G	TGCAGTAGACTCAGAGAAGGGTAAATTATGTGTATTACACAAAAACAATTTGCACCAGCCGGGAATCGA	5B	18.047
1125547|F|0-33:G>C-33:G>C	TGCAGACAAGGAAGGAACAAGAGGTGCAACGGTGACTGCGTGACATAGTTACTTGGCCACAAAATGAAG	5B	20.686
4536592	TGCAGGCGCCCGTGGCCGCTGTCAATGCCGCCTGTGCGCACGCACCG	5B	23.325
21743451	TGCAGCTACCACTACTACCACGACGGACACGCCCCG	5B	26.088
5410699|F|0-43:G>A-43:G>A	TGCAGATGTAATTGATCTCGGAGGTGAAATTGAGCTTCTGCCTGGTCATGATCAACTCAATGACACCCA	5B	26.434
3534170	TGCAGCCCTACGAACCAAGAACAAAAACATTCTGCAAAACGCTCGATCCGTCGCCCCACCG	5B	28.151
1263008	TGCAGACATGACACACCGTTCATCGCACGGCTGATGGCGCTCGGAGGCGTCACGTCCACGCCCTCCGCG	5B	28.839
5567203	TGCAGCCTCACACACTTCAGGTTCATGGGGCCG	5B	30.633
1213603	TGCAGGCGGCCATGGCGCCCTGCGCTGACGTCCGTGGGGCAGCAGAGGTGGAGCGGACGGTGGCGCCGA	5B	34.932
4536567	TGCAGGCGGTACCCCGTGTGGAGCTGAAGCCG	5B	36.352
1268175	TGCAGAAAAGAAAGTGATCCTACTAACGACGCTGATGACTTGACTCATTGGATGTCCG	5B	37.1
1221584|F|0-30:C>A-30:C>A	TGCAGCCCCTGCTGCTCCGACCGCGCCATGCTGCAATTGCTGCTGCTGCACAGGGCAACGGGGCGAGTG	5B	39.171
3222405	TGCAGTAAAACCAGGCCGTCCCGTCGAAATCGCCATGCCGTGCTTCCGCCG	5B	40.704
3952559	TGCAGTAGACGAGGAGAGGGTGAAGACGAGCTCCTCCG	5B	41.212
1054614|F|0-33:C>T-33:C>T	TGCAGCCCAAGTGGCACGCTAGAAATACACACGCGCAAAGCAGATCAAAAAGTTGACAGCGAACAAAGT	5B	44.827
4539283	TGCAGATGGGGGGCCGTCGGCGTGGCCGCCG	5B	46.375
3029597	TGCAGAATTGCAGAGTCCAAACCCCAGCGCTCACGCCG	5B	49.188
1264938	TGCAGCTGGGTAGGTGTGGGCTGTGATGGCGCCCATGGTCGTGTCACGGCGCTACGACTCCCCG	5B	52.087
7335753	TGCAGCTTGCGCGACCTGGCCG	5B	57.587
3959844	TGCAGTGTGGCAGCGGGCCTAGCTGGTGCAGGTTGCCGAGCACCG	5B	58.745
1139403|F|0-28:C>T-28:C>T	TGCAGGTGAGAATAAAATTGCCTGCCGCCCTTCTGCCAGTGCTGCACGGTACACACTCTGATTATTTTG	5B	59.888
4262868	TGCAGGAATGGCATTTTTTTTGGGTCCATCCACGCCG	5B	64.044
1202436|F|0-47:C>A-47:C>A	TGCAGCGCTTTCTCTTGCTCCTCCGTGAAGCTTTCCATCCTCCCGTCCGAACTGAATTCAAGTGTGTGG	5B	64.494
1201143|F|0-19:T>C-19:T>C	TGCAGCTTGATCTCGTGAATGAGGCAGAGATCGGCCTGGAGGCGATATATGAGGCACTCGGGCACGGCG	5B	65.495
1103345	TGCAGGTAAACACGCCTCGTGCGGGCAGGGCCTCGCGTAGAACTTGGGGATGTTATCCCCG	5B	68.257
3533652	TGCAGTCAGCTGCTGCCCTCGCTGTCGTCTGCTCGCGCCG	5B	69.004
3952067	TGCAGCAAGAATGCTGGGATGTCTGCCGCCG	5B	72.158
5411786|F|0-6:T>A-6:T>A	TGCAGCTAGAATCCTGGGATGTCTGCCGCCG	5B	73.521
1151573	TGCAGTAGTGACATGAGGATTACTTCCACTATGGAGGTTTGTTCTCCTATAACCAAACAAGGCCTTCTC	5B	78.71
1381775	TGCAGTCGCGACGCGCCACACCTGCCGTGCGCCCCTGTCCTGGGCATGATGCTGCTGCTGCTCGCCTCT	5D	0
1117581	TGCAGAGCGATAACAGATGCTGGGATGCGTTTCATTGTGCGTGCCCCATGCTTGATCAATCTCACACTC	5D	0.263
1207641	TGCAGTAGCACCGCCCCACCTCGCCGCATCTTCAAGCTCGCGCCGCCGTGCGAAGCCCCG	5D	16.834
1297537	TGCAGCCCCGCCGCCACACATGACCAGATCCAGGCCACCGCAAGCCAGATCCG	5D	26.777
1091409	TGCAGGTTAGGGAGGAGGGTCGGGGCAACCACGAATTCCGTCCTGCACTGCTTCAACACCG	5D	28.321
1105309	TGCAGGAAAAAGGTTCCACCTCCACCATCCGAAGACACCAAGGAGGTGTCCG	5D	30.248
1150105	TGCAGTTAGCAGCGGCACAAGCAGCGCAGCAACGGCGACAGTAGCGCCG	5D	32.11
3936114	TGCAGGGGCCACTTTGAGTCGCTGGAGCATTGTGAGTCGCCG	5D	34.178
3953193	TGCAGCGAAGGGCTCGTCGACTGGGTTCATGACCAATGACGCTCCCG	5D	35.667
1160444	TGCAGCCAGTTCAGCGGGCAGCCCACCTGCACATGAAACGCCGCGTCGACCG	5D	37.601
5358036	TGCAGCTGCGGCTCGGCGGGTCAACCCG	5D	39.146
3954621	TGCAGGTCAAGCCAGTCGTTGTGGCCGCTGCGAGCACAAACGCCG	5D	39.247
994953	TGCAGGCAACAACCACGTTTCTTTGCGGCCCAGCTCCATGCCTGTTGGAAACGGCTAGGTTCGCCGAGA	5D	41.575
1122791	TGCAGTCGTATCAGGCAGGGCGGAACCGCTGGCGACCACCGCGCTAGCAACCTCGCGCACCACTGGGGT	5D	42.141
1111147	TGCAGGTTGAGTACTCTAGGTTGCATCCTTTTGTTATGGTATCTGAAATTTTTGGTGTTCCG	5D	44.995
1123304	TGCAGGCACGCACATGAGCATGCAAGGCATGCCTAGGAACACCAGATGCTCTGTGTGCACGCATACTGG	5D	46.242
7348096	TGCAGCTGTCTCCTCCACCCCTCGGCATGCCCG	5D	50.771
[truncated: 1,085 more rows]
